# Supplementary material for: Theoretical insights into the metal-free and formal [2 + 2 + 2] cycloaddition strategy via intramolecular cascade propargylic ene/Diels–Alder reactions with tautomerization
Source: Royal Society of Chemistry journal article supplement (doi:10.1039/c1ob05254c), 2011-01-01
Supplement: c1ob05254c.pdf [file c1ob05254c.pdf]

## Electronic Supporting Information

# Theoretical Insights into the Metal-free and Formal [2+2+2] Cycloaddition Strategy via Intramolecular Cascade Propargylic Ene/Diels-Alder Reactions with Tautomerization

Xinyao Li, and Jiayi Xu\*

*State Key Laboratory of Chemical Resource Engineering, Department of Organic Chemistry,  
Faculty of Science, Beijing University of Chemical Technology, Beijing 100029, P.R. China*

E-mail: jxxu@mail.buct.edu.cn

## Content

|                                                                              |     |
|------------------------------------------------------------------------------|-----|
| 1. The Computed Spin Distributions of the Diradical Species.....             | S2  |
| 2.The Tautomerization Assisted by One or Two Water Molecules.....            | S3  |
| 3. Computed Energy Surface for the Metal-free [2 + 2 + 2] Cycloaddition..... | S4  |
| 4. Computed Energies of All Stationary Points .....                          | S6  |
| 5. Coordinates of All Stationary Points.....                                 | S11 |

## 1. The Computed Spin Distribution of the Diradical Species.

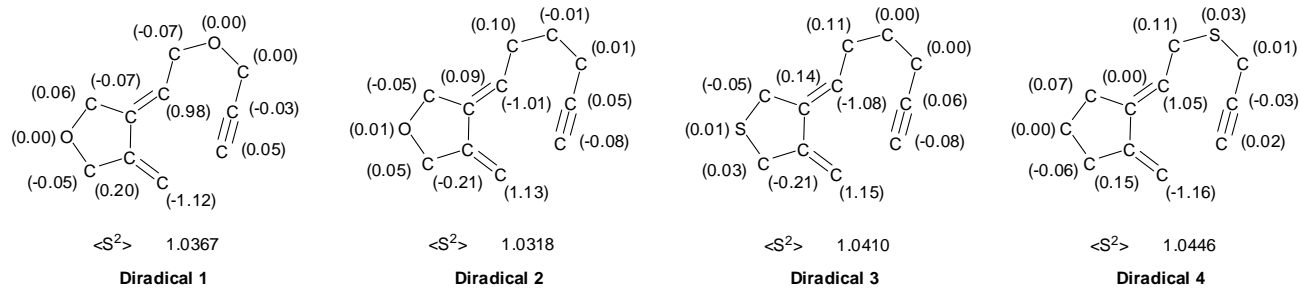

## Singlet and Triplet Diradical Energies and the Spin Correction Energies Using Yamaguchi-Houk Method

|                               | Diradical 1 | Diradical 2  | Diradical 3  | Diradical 4  |
|-------------------------------|-------------|--------------|--------------|--------------|
| $E_{\text{ele}}$<br>(singlet) | -537.367336 | -501.4711351 | -824.4565929 | -824.4534394 |
| $E_{\text{ele}}$<br>(triplet) | -537.366473 | -501.4701311 | -824.4559668 | -824.4527621 |
| $\Delta E$<br>(kcal/mol)      | 38.3        | 39.9         | 42.2         | 43.8         |

## 2.The Tautomerization Assisted by One or Two Water Molecules.

|                    | H-transfer assisted by two water molecules                                          |                                                                                     |                                                                                     | H-transfer assisted by one water molecule                                            |                                                                                       |                                                                                       |
|--------------------|-------------------------------------------------------------------------------------|-------------------------------------------------------------------------------------|-------------------------------------------------------------------------------------|--------------------------------------------------------------------------------------|---------------------------------------------------------------------------------------|---------------------------------------------------------------------------------------|
| structures         | 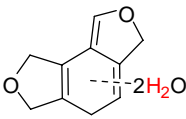   |    |    |    |    |    |
|                    | <b>9-2H<sub>2</sub>O</b>                                                            | <b>TS4</b>                                                                          | <b>TS5</b>                                                                          | <b>9-H<sub>2</sub>O</b>                                                              | <b>TS4-H<sub>2</sub>O</b>                                                             | <b>TS5-H<sub>2</sub>O</b>                                                             |
| $\Delta G$         | -95.0                                                                               | -55.8                                                                               | -51.9                                                                               | -97.1                                                                                | -47.7                                                                                 | -39.4                                                                                 |
| $(\Delta E_0)$     | -110.4                                                                              | -74.5                                                                               | -71.0                                                                               | -109.0                                                                               | -63.3                                                                                 | -55.7                                                                                 |
| $[\Delta G_{sol}]$ | -92.5                                                                               | -57.7                                                                               | -55.1                                                                               | -95.7                                                                                | -49.8                                                                                 | -42.0                                                                                 |
| structures         |    |    |    |    |    |    |
|                    | <b>12-2H<sub>2</sub>O</b>                                                           | <b>TS10</b>                                                                         | <b>TS11</b>                                                                         | <b>12-H<sub>2</sub>O</b>                                                             | <b>TS10-H<sub>2</sub>O</b>                                                            | <b>TS11-H<sub>2</sub>O</b>                                                            |
| $\Delta G$         | -87.0                                                                               | -40.7                                                                               | -47.7                                                                               | -88.7                                                                                | -33.4                                                                                 | -34.6                                                                                 |
| $(\Delta E_0)$     | -102.3                                                                              | -59.9                                                                               | -67.3                                                                               | -101.2                                                                               | -49.5                                                                                 | -51.3                                                                                 |
| $[\Delta G_{sol}]$ | -84.0                                                                               | -42.7                                                                               | -50.4                                                                               | -87.4                                                                                | -35.6                                                                                 | -36.9                                                                                 |
| structures         |   |   |   |   |   |   |
|                    | <b>12-c-2H<sub>2</sub>O</b>                                                         | <b>TS10-c</b>                                                                       | <b>TS11-c</b>                                                                       | <b>12-c-H<sub>2</sub>O</b>                                                           | <b>TS10-c-H<sub>2</sub>O</b>                                                          | <b>TS11-c-H<sub>2</sub>O</b>                                                          |
| $\Delta G$         | -89.1                                                                               | -50.5                                                                               | -45.7                                                                               | -90.6                                                                                | -42.0                                                                                 | -33.7                                                                                 |
| $(\Delta E_0)$     | -104.7                                                                              | -69.7                                                                               | -65.7                                                                               | -103.7                                                                               | -58.3                                                                                 | -50.7                                                                                 |
| $[\Delta G_{sol}]$ | -86.0                                                                               | -52.5                                                                               | -48.5                                                                               | -89.0                                                                                | -44.3                                                                                 | -36.0                                                                                 |
| structures         |  |  |  |  |  |  |
|                    | <b>12-2H<sub>2</sub>O</b>                                                           | <b>TS10</b>                                                                         | <b>TS11</b>                                                                         | <b>12-H<sub>2</sub>O</b>                                                             | <b>TS10-H<sub>2</sub>O</b>                                                            | <b>TS11-H<sub>2</sub>O</b>                                                            |
| $\Delta G$         | -89.6                                                                               | -41.4                                                                               | -48.4                                                                               | -89.6                                                                                | -33.8                                                                                 | -35.4                                                                                 |
| $(\Delta E_0)$     | -101.5                                                                              | -60.1                                                                               | -67.5                                                                               | -101.5                                                                               | -49.5                                                                                 | -51.5                                                                                 |
| $[\Delta G_{sol}]$ | -88.7                                                                               | -46.9                                                                               | -51.4                                                                               | -88.7                                                                                | -36.5                                                                                 | -37.9                                                                                 |
| structures         |  |  |  |  |  |  |
|                    | <b>12-2H<sub>2</sub>O</b>                                                           | <b>TS10</b>                                                                         | <b>TS11</b>                                                                         | <b>12-H<sub>2</sub>O</b>                                                             | <b>TS10-H<sub>2</sub>O</b>                                                            | <b>TS11-H<sub>2</sub>O</b>                                                            |
| $\Delta G$         | -87.5                                                                               | -48.4                                                                               | -48.7                                                                               | -88.8                                                                                | -41.6                                                                                 | -37.9                                                                                 |
| $(\Delta E_0)$     | -103.3                                                                              | -67.4                                                                               | -68.5                                                                               | -102.1                                                                               | -57.5                                                                                 | -54.5                                                                                 |
| $[\Delta G_{sol}]$ | -85.3                                                                               | -50.1                                                                               | -51.5                                                                               | -86.6                                                                                | -43.6                                                                                 | -40.2                                                                                 |

### 3. Computed Energy Surface for the Metal-free [2 + 2 + 2] Cycloaddition

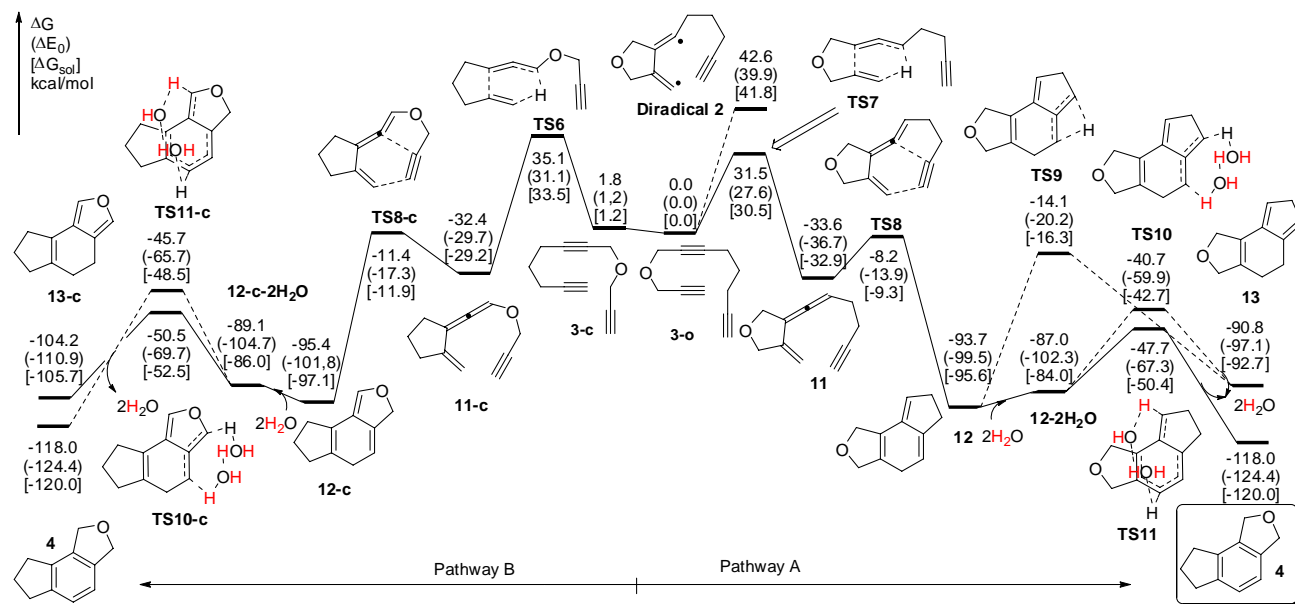

**Figure S1.** DFT computed full energy surface for the metal-free [2 + 2 + 2] cycloaddition of model system II

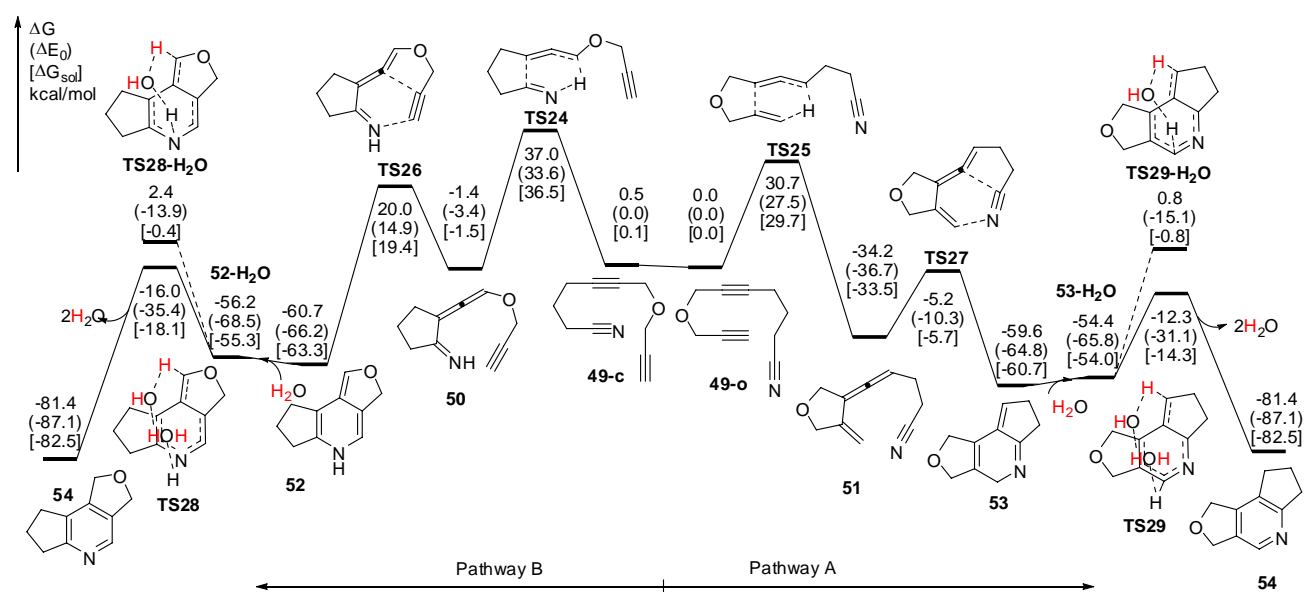

**Figure S2.** DFT computed full energy surface for the metal-free [2 + 2 + 2] cycloaddition of Danheiser's experimental model.

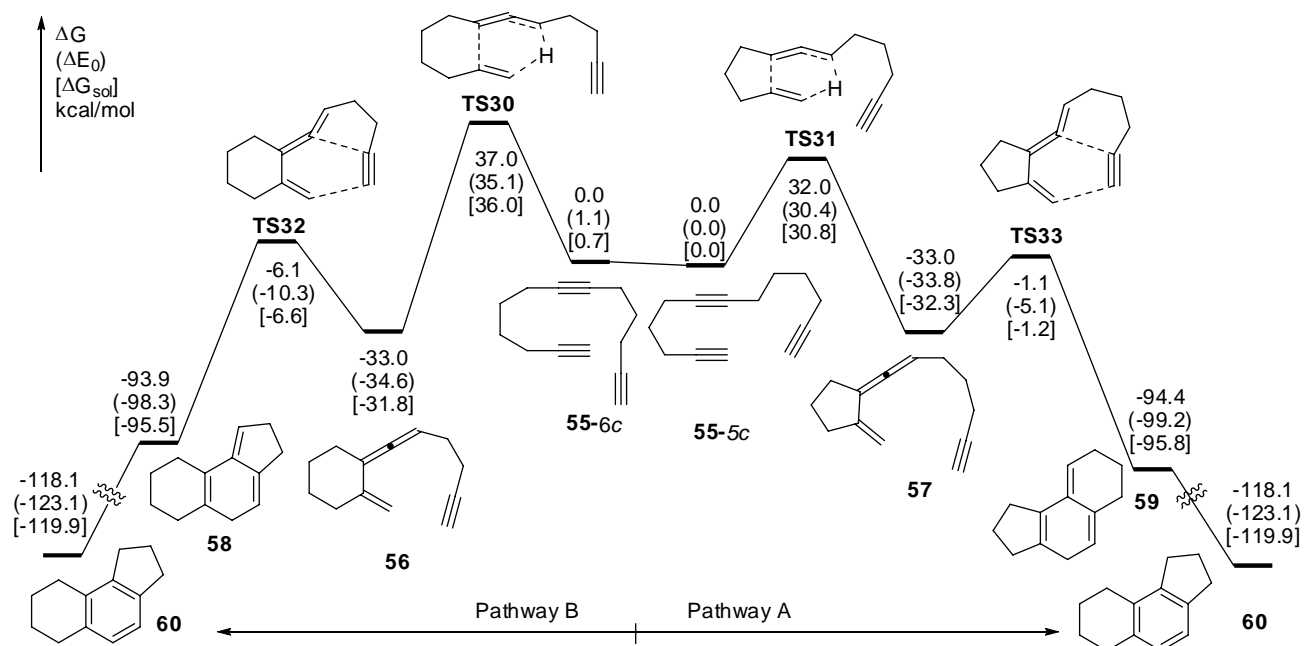

**Figure S3.** DFT computed full energy surface for the metal-free [2 + 2 + 2] cycloaddition of the unsymmetric triyne with five and six-member ring precursors

## 4. Computed Energies of All Stationary Points

**Table S1.** Model system **I**. Sum of electronic and zero-point energies (E, in a.u.), sum of electronic and thermal enthalpies (H, in a.u.), sum of electronic and thermal free energies (G, in a.u.), thermal correction to Gibbs free energy (TCGFE, in a.u.), total free energy in solution (G<sub>s</sub>, which equals to E<sub>s</sub> + TCGFE, in a.u., solvent = toluene)

|                           | <b>E</b>    | <b>H</b>    | <b>G</b>    | <b>TCGFE</b> | <b>G<sub>s</sub></b> |
|---------------------------|-------------|-------------|-------------|--------------|----------------------|
| <b>1</b>                  | -537.259509 | -537.244808 | -537.303902 | 0.124843     | -537.302588          |
| <b>H<sub>2</sub>O</b>     | -76.437180  | -76.433400  | -76.454823  | 0.003640     | -76.460402           |
| <b>2H<sub>2</sub>O</b>    | -152.879954 | -152.873281 | -152.906028 | 0.020198     | -152.914736          |
| <b>Diradical 1</b>        | -537.198498 | -537.185025 | -537.239927 | 0.127409     | -537.238217          |
| <b>TS1</b>                | -537.216699 | -537.203830 | -537.255614 | 0.126805     | -537.255587          |
| <b>8</b>                  | -537.319695 | -537.306549 | -537.360448 | 0.130846     | -537.357981          |
| <b>TS2</b>                | -537.296263 | -537.284720 | -537.332304 | 0.135747     | -537.331796          |
| <b>9</b>                  | -537.430648 | -537.420057 | -537.466048 | 0.142393     | -537.467391          |
| <b>9-H<sub>2</sub>O</b>   | -613.870416 | -613.855726 | -613.913438 | 0.157961     | -613.915573          |
| <b>9-2H<sub>2</sub>O</b>  | -690.315457 | -690.298088 | -690.361302 | 0.180491     | -690.364769          |
| <b>TS5</b>                | -690.252531 | -690.238014 | -690.292713 | 0.179223     | -690.305097          |
| <b>TS5-H<sub>2</sub>O</b> | -613.797638 | -613.785512 | -613.834735 | 0.158270     | -613.842287          |
| <b>TS3</b>                | -537.307550 | -537.296650 | -537.343042 | 0.135405     | -537.344846          |
| <b>2</b>                  | -537.445020 | -537.434750 | -537.479900 | 0.143957     | -537.480950          |
| <b>TS4</b>                | -690.258251 | -690.243783 | -690.29892  | 0.178493     | -690.309237          |
| <b>TS4-H<sub>2</sub>O</b> | -613.785470 | -613.773692 | -613.821569 | 0.159721     | -613.829983          |
| <b>10</b>                 | -537.465439 | -537.455026 | -537.500802 | 0.143442     | -537.502440          |

**Table S2.** Model system **II**. Sum of electronic and zero-point energies (E, in a.u.), sum of electronic and thermal enthalpies (H, in a.u.), sum of electronic and thermal free energies (G, in a.u.), thermal correction to Gibbs free energy (TCGFE, in a.u.), total free energy in solution (G<sub>s</sub>, which equals to E<sub>s</sub> + TCGFE, in a.u., solvent = toluene).

|                            | <b>E</b>    | <b>H</b>    | <b>G</b>    | <b>TCGFE</b> | <b>G<sub>s</sub></b> |
|----------------------------|-------------|-------------|-------------|--------------|----------------------|
| <b>3-o</b>                 | -501.341972 | -501.327033 | -501.387254 | 0.148206     | -501.383886          |
| <b>Diradical 2</b>         | -501.278370 | -501.264671 | -501.319345 | 0.151790     | -501.317268          |
| <b>TS7</b>                 | -501.298056 | -501.284980 | -501.337056 | 0.150977     | -501.335301          |
| <b>11</b>                  | -501.400493 | -501.387209 | -501.440750 | 0.155515     | -501.436382          |
| <b>TS8</b>                 | -501.364177 | -501.352439 | -501.400269 | 0.159407     | -501.398661          |
| <b>12</b>                  | -501.500463 | -501.489551 | -501.536502 | 0.165442     | -501.536173          |
| <b>12-H<sub>2</sub>O</b>   | -577.940450 | -577.925502 | -577.983505 | 0.181729     | -577.983565          |
| <b>12-2H<sub>2</sub>O</b>  | -654.384985 | -654.367014 | -654.431943 | 0.202628     | -654.432437          |
| <b>TS9</b>                 | -501.374230 | -501.363139 | -501.409758 | 0.158784     | -501.409874          |
| <b>TS10</b>                | -654.317385 | -654.302638 | -654.358153 | 0.20112      | -654.366663          |
| <b>TS10-H<sub>2</sub>O</b> | -577.857981 | -577.845533 | -577.895239 | 0.180972     | -577.901000          |
| <b>13</b>                  | -501.496762 | -501.486096 | -501.531919 | 0.166234     | -501.531660          |
| <b>TS11</b>                | -654.329236 | -654.314537 | -654.369376 | 0.203557     | -654.379000          |
| <b>TS11-H<sub>2</sub>O</b> | -577.860923 | -577.848884 | -577.897283 | 0.183190     | -577.903034          |
| <b>4</b>                   | -501.540234 | -501.529768 | -501.575311 | 0.167965     | -501.575063          |
| <b>3-c</b>                 | -501.340123 | -501.325202 | -501.384409 | 0.149073     | -501.382051          |

|                              |             |             |             |          |             |
|------------------------------|-------------|-------------|-------------|----------|-------------|
| <b>TS6</b>                   | -501.292393 | -501.279311 | -501.331375 | 0.150356 | -501.330502 |
| <b>11-c</b>                  | -501.393658 | -501.380350 | -501.434524 | 0.154735 | -501.430377 |
| <b>TS8-c</b>                 | -501.369604 | -501.357977 | -501.405456 | 0.160036 | -501.402845 |
| <b>12-c</b>                  | -501.504249 | -501.493609 | -501.539344 | 0.166981 | -501.538604 |
| <b>12-c-H<sub>2</sub>O</b>   | -577.944343 | -577.929710 | -577.986466 | 0.183305 | -577.986144 |
| <b>12-c-2H<sub>2</sub>O</b>  | -654.388809 | -654.370975 | -654.435235 | 0.203588 | -654.435711 |
| <b>TS10-c</b>                | -654.333074 | -654.318413 | -654.37378  | 0.202878 | -654.382364 |
| <b>TS10-c-H<sub>2</sub>O</b> | -577.872040 | -577.859784 | -577.908982 | 0.182836 | -577.914918 |
| <b>13-c</b>                  | -501.518656 | -501.508303 | -501.553330 | 0.168382 | -501.552276 |
| <b>TS11-c</b>                | -654.326624 | -654.312134 | -654.366143 | 0.203585 | -654.375848 |
| <b>TS11-c-H<sub>2</sub>O</b> | -577.859995 | -577.848137 | -577.895857 | 0.183859 | -577.901708 |

**Table S3.** Model system **III**. Sum of electronic and zero-point energies (E, in a.u.), sum of electronic and thermal enthalpies (H, in a.u.), sum of electronic and thermal free energies (G, in a.u.), thermal correction to Gibbs free energy (TCGFE, in a.u.), total free energy in solution (G<sub>s</sub>, which equals to E<sub>s</sub> + TCGFE, in a.u., solvent = toluene).

|                            | <b>E</b>    | <b>H</b>    | <b>G</b>    | <b>TCGFE</b> | <b>G<sub>s</sub></b> |
|----------------------------|-------------|-------------|-------------|--------------|----------------------|
| <b>5-s</b>                 | -824.334299 | -824.318704 | -824.379758 | 0.144258     | -824.376758          |
| <b>Diradical 3</b>         | -824.267044 | -824.252799 | -824.309478 | 0.147115     | -824.308246          |
| <b>TS13</b>                | -824.284690 | -824.270985 | -824.324775 | 0.145839     | -824.324087          |
| <b>15</b>                  | -824.389516 | -824.375725 | -824.431057 | 0.151020     | -824.427418          |
| <b>TS15</b>                | -824.353960 | -824.341779 | -824.390987 | 0.155468     | -824.390231          |
| <b>17</b>                  | -824.493105 | -824.481738 | -824.530109 | 0.161493     | -824.530772          |
| <b>17-H<sub>2</sub>O</b>   | -900.933167 | -900.917719 | -900.977436 | 0.177419     | -900.978444          |
| <b>17-2H<sub>2</sub>O</b>  | -977.37799  | -977.36037  | -977.424308 | 0.2001       | -977.425916          |
| <b>TS17</b>                | -977.310053 | -977.294851 | -977.351707 | 0.197198     | -977.366183          |
| <b>TS17-H<sub>2</sub>O</b> | -900.850422 | -900.837551 | -900.888489 | 0.177214     | -900.895256          |
| <b>19</b>                  | -824.489399 | -824.478317 | -824.525367 | 0.162496     | -824.526075          |
| <b>TS19</b>                | -977.321883 | -977.306739 | -977.362882 | 0.199701     | -977.373367          |
| <b>TS19-H<sub>2</sub>O</b> | -900.853590 | -900.841059 | -900.890986 | 0.179196     | -900.897575          |
| <b>6</b>                   | -824.532408 | -824.521461 | -824.568589 | 0.163778     | -824.569345          |
| <b>5-c</b>                 | -824.331942 | -824.316344 | -824.377296 | 0.144371     | -824.374913          |
| <b>Diradical 4</b>         | -824.264552 | -824.250138 | -824.307779 | 0.145660     | -824.304647          |
| <b>TS12</b>                | -824.284954 | -824.271128 | -824.325477 | 0.144954     | -824.324530          |
| <b>14</b>                  | -824.386559 | -824.372660 | -824.428081 | 0.150556     | -824.423704          |
| <b>TS14</b>                | -824.353844 | -824.341666 | -824.390594 | 0.155649     | -824.389029          |
| <b>16</b>                  | -824.494160 | -824.482947 | -824.530533 | 0.162373     | -824.530853          |
| <b>16-H<sub>2</sub>O</b>   | -900.934114 | -900.919197 | -900.976048 | 0.180556     | -900.975177          |
| <b>16-2H<sub>2</sub>O</b>  | -977.378867 | -977.360889 | -977.425298 | 0.200825     | -977.427366          |
| <b>TS18</b>                | -977.321588 | -977.306516 | -977.362895 | 0.198404     | -977.37141           |
| <b>TS18-H<sub>2</sub>O</b> | -900.863139 | -900.850379 | -900.900872 | 0.178181     | -900.906588          |
| <b>7</b>                   | -824.509911 | -824.499094 | -824.545306 | 0.164288     | -824.545245          |
| <b>TS16</b>                | -977.32334  | -977.308449 | -977.363461 | 0.201342     | -977.373508          |
| <b>TS16-H<sub>2</sub>O</b> | -900.858344 | -900.846036 | -900.894965 | 0.180666     | -900.901152          |

**Table S4.** Intramolecular propargylic ene reactions with different diynes. Sum of electronic and zero-point energies (E, in a.u.), sum of electronic and thermal enthalpies (H, in a.u.), sum of electronic and thermal free energies (G, in a.u.).

|               | <b>E</b>    | <b>H</b>    | <b>G</b>    |
|---------------|-------------|-------------|-------------|
| <b>20</b>     | -271.386964 | -271.377435 | -271.421428 |
| <b>TS(20)</b> | -271.311587 | -271.303903 | -271.341891 |
| <b>21</b>     | -310.680069 | -310.669198 | -310.716767 |
| <b>TS(21)</b> | -310.630011 | -310.621434 | -310.661398 |
| <b>22</b>     | -349.973377 | -349.961242 | -350.011696 |
| <b>TS(22)</b> | -349.917034 | -349.907156 | -349.950371 |
| <b>23</b>     | -389.269803 | -389.256405 | -389.309887 |
| <b>TS(23)</b> | -389.203616 | -389.192445 | -389.238615 |
| <b>24</b>     | -77.329619  | -77.325876  | -77.349225  |
|               | -116.637296 | -116.632410 | -116.661494 |
| <b>TS(24)</b> | -193.913763 | -193.907225 | -193.941705 |
| <b>25</b>     | -389.273413 | -389.259889 | -389.312279 |
| <b>TS(25)</b> | -389.225591 | -389.214217 | -389.260016 |
| <b>26</b>     | -384.734866 | -384.723348 | -384.773257 |
| <b>TS(26)</b> | -384.684526 | -384.675024 | -384.718318 |
| <b>27</b>     | -366.009928 | -365.997855 | -366.047740 |
| <b>TS(27)</b> | -365.962244 | -365.952362 | -365.995235 |
| <b>28</b>     | -346.600107 | -346.589466 | -346.636750 |
| <b>TS(28)</b> | -346.554565 | -346.546177 | -346.585895 |
| <b>29</b>     | -669.592483 | -669.581148 | -669.630307 |
| <b>TS(29)</b> | -669.541138 | -669.532151 | -669.573546 |
| <b>30</b>     | -464.487916 | -464.474326 | -464.528927 |
| <b>TS(30)</b> | -464.444087 | -464.431419 | -464.482123 |
| <b>31</b>     | -499.245954 | -499.232101 | -499.289332 |
| <b>TS(31)</b> | -499.206083 | -499.193981 | -499.243452 |
| <b>32</b>     | -577.622676 | -577.607945 | -577.667179 |
| <b>TS(32)</b> | -577.582597 | -577.569581 | -577.621855 |
| <b>33</b>     | -422.743566 | -422.731284 | -422.783302 |
| <b>TS(33)</b> | -422.703530 | -422.693014 | -422.738131 |
| <b>34</b>     | -445.865676 | -445.854562 | -445.903871 |
| <b>TS(34)</b> | -445.821304 | -445.812122 | -445.854337 |
| <b>35</b>     | -551.151396 | -551.138575 | -551.193440 |
| <b>TS(35)</b> | -551.109198 | -551.098120 | -551.145681 |
| <b>36</b>     | -692.389122 | -692.370198 | -692.439713 |
| <b>TS(36)</b> | -692.347477 | -692.330009 | -692.393917 |
| <b>37</b>     | -695.527009 | -695.507993 | -695.578554 |
| <b>TS(37)</b> | -695.479565 | -695.462021 | -695.526222 |
| <b>38</b>     | -949.311695 | -949.287461 | -949.369416 |
| <b>TS(38)</b> | -949.268233 | -949.245336 | -949.321873 |
| <b>39</b>     | -460.882933 | -460.871257 | -460.921570 |
| <b>TS(39)</b> | -460.869471 | -460.859104 | -460.904382 |



|               |             |             |             |
|---------------|-------------|-------------|-------------|
| <b>40</b>     | -500.183626 | -500.170592 | -500.224512 |
| <b>TS(40)</b> | -500.170993 | -500.159829 | -500.206703 |
| <b>41</b>     | -463.253497 | -463.240753 | -463.293039 |
| <b>TS(41)</b> | -463.237829 | -463.226766 | -463.273038 |
| <b>42</b>     | -502.545447 | -502.531345 | -502.587175 |
| <b>TS(42)</b> | -502.523791 | -502.511680 | -502.560306 |

**Table S5.** Our designed model systems. Sum of electronic and zero-point energies (E, in a.u.), sum of electronic and thermal enthalpies (H, in a.u.), sum of electronic and thermal free energies (G, in a.u.).

|             | <b>E</b>    | <b>H</b>    | <b>G</b>    |
|-------------|-------------|-------------|-------------|
| <b>43</b>   | -690.843515 | -690.826418 | -690.891774 |
| <b>TS20</b> | -690.828871 | -690.813232 | -690.872371 |
| <b>44</b>   | -690.977640 | -690.962430 | -691.021205 |
| <b>TS21</b> | -690.946182 | -690.932183 | -690.985679 |
| <b>45</b>   | -691.037225 | -691.024514 | -691.074906 |
| <b>46</b>   | -653.912975 | -653.896158 | -653.960020 |
| <b>TS22</b> | -653.896102 | -653.880571 | -653.939347 |
| <b>47</b>   | -654.028377 | -654.013176 | -654.072208 |
| <b>TS23</b> | -654.002128 | -653.988515 | -654.040773 |
| <b>48</b>   | -654.134461 | -654.122043 | -654.171780 |

**Table S6.** Danheiser's experimental model. Sum of electronic and zero-point energies (E, in a.u.), sum of electronic and thermal enthalpies (H, in a.u.), sum of electronic and thermal free energies (G, in a.u.), thermal correction to Gibbs free energy (TCGFE, in a.u.), total free energy in solution (G<sub>s</sub>, which equals to E<sub>s</sub> + TCGFE, in a.u., solvent = toluene).

|                          | <b>E</b>    | <b>H</b>    | <b>G</b>    | <b>TCGFE</b> | <b>G<sub>s</sub></b> |
|--------------------------|-------------|-------------|-------------|--------------|----------------------|
| <b>49-o</b>              | -517.455302 | -517.440716 | -517.499342 | 0.139141     | -517.498919          |
| <b>TS25</b>              | -517.411478 | -517.398698 | -517.450398 | 0.140623     | -517.451581          |
| <b>51</b>                | -517.513722 | -517.500753 | -517.553846 | 0.145301     | -517.552331          |
| <b>TS27</b>              | -517.471660 | -517.460276 | -517.507644 | 0.149269     | -517.508023          |
| <b>53</b>                | -517.558565 | -517.547845 | -517.594273 | 0.154393     | -517.595657          |
| <b>53-H<sub>2</sub>O</b> | -593.997273 | -593.982069 | -594.040865 | 0.169292     | -594.045447          |
| <b>TS29</b>              | -593.916560 | -593.904696 | -593.952869 | 0.171954     | -593.960659          |
| <b>54</b>                | -517.594156 | -517.583836 | -517.629137 | 0.156387     | -517.630376          |
| <b>49-c</b>              | -517.455305 | -517.440793 | -517.498496 | 0.139991     | -517.498817          |
| <b>TS24</b>              | -517.401804 | -517.389182 | -517.440418 | 0.140503     | -517.440758          |
| <b>50</b>                | -517.460725 | -517.447634 | -517.501538 | 0.144032     | -517.501297          |
| <b>TS26</b>              | -517.431499 | -517.420010 | -517.467390 | 0.148826     | -517.467981          |
| <b>52</b>                | -517.560773 | -517.549981 | -517.596024 | 0.155338     | -517.599841          |
| <b>52-H<sub>2</sub>O</b> | -594.001593 | -593.986818 | -594.043686 | 0.171917     | -594.047466          |
| <b>TS28</b>              | -593.914677 | -593.903083 | -593.950370 | 0.174417     | -593.959977          |

**Table S7.** The unsymmetric triyne with five and six-member ring precursors. Sum of electronic and zero-point energies (E, in a.u.), sum of electronic and thermal enthalpies (H, in a.u.), sum of electronic and thermal free energies (G, in a.u.), thermal correction to Gibbs free energy (TCGFE, in a.u.), total free energy in solution (G<sub>s</sub>, which equals to E<sub>s</sub> +

TCGFE, in a.u., solvent = toluene).

|              | <b>E</b>    | <b>H</b>    | <b>G</b>    | <b>TCGFE</b> | <b>G<sub>s</sub></b> |
|--------------|-------------|-------------|-------------|--------------|----------------------|
| <b>55-5c</b> | -504.716780 | -504.701146 | -504.760689 | 0.201969     | -504.756017          |
| <b>TS31</b>  | -504.668276 | -504.653586 | -504.709713 | 0.200411     | -504.706940          |
| <b>57</b>    | -504.770658 | -504.755778 | -504.813199 | 0.205502     | -504.807441          |
| <b>TS33</b>  | -504.724921 | -504.711845 | -504.762479 | 0.210735     | -504.757960          |
| <b>59</b>    | -504.874892 | -504.863147 | -504.911104 | 0.219132     | -504.908643          |
| <b>60</b>    | -504.913029 | -504.901523 | -504.948942 | 0.220529     | -504.947018          |
| <b>55-6c</b> | -504.714961 | -504.698596 | -504.760749 | 0.200428     | -504.754980          |
| <b>TS30</b>  | -504.660808 | -504.646187 | -504.701784 | 0.200782     | -504.698644          |
| <b>56</b>    | -504.771996 | -504.757611 | -504.813351 | 0.207819     | -504.806694          |
| <b>TS32</b>  | -504.733201 | -504.720375 | -504.770445 | 0.211609     | -504.766592          |
| <b>58</b>    | -504.873444 | -504.861526 | -504.910360 | 0.218090     | -504.908236          |

## 5. Coordinates of All Stationary Points [imaginary frequencies (in brackets, $\text{cm}^{-1}$ ) for the transition states occurring in the thermal cycloaddition]

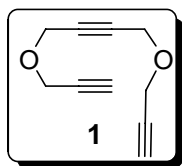

(Nimag=0)

| Center Number | Atomic Number | Atomic Type | Coordinates (Angstroms) |           |           |
|---------------|---------------|-------------|-------------------------|-----------|-----------|
|               |               |             | X                       | Y         | Z         |
| 1             | 6             | 0           | 3.193641                | 1.381209  | 0.191817  |
| 2             | 6             | 0           | 2.712758                | 2.476410  | 0.073519  |
| 3             | 1             | 0           | 2.272468                | 3.437244  | -0.036000 |
| 4             | 6             | 0           | 3.858138                | 0.082677  | 0.336752  |
| 5             | 1             | 0           | 3.834965                | -0.228880 | 1.390315  |
| 6             | 1             | 0           | 4.907678                | 0.192885  | 0.050488  |
| 7             | 6             | 0           | 2.264848                | -1.705598 | 0.053353  |
| 8             | 1             | 0           | 2.178004                | -2.582962 | -0.592133 |
| 9             | 1             | 0           | 2.534841                | -2.060265 | 1.058850  |
| 10            | 6             | 0           | 0.975075                | -1.019052 | 0.106900  |
| 11            | 6             | 0           | -0.111368               | -0.503069 | 0.145508  |
| 12            | 6             | 0           | -1.396662               | 0.171656  | 0.219333  |
| 13            | 1             | 0           | -1.238017               | 1.261109  | 0.201261  |
| 14            | 1             | 0           | -1.897223               | -0.073255 | 1.165526  |
| 15            | 6             | 0           | -3.460478               | 0.462896  | -0.929019 |
| 16            | 1             | 0           | -3.918840               | 0.170187  | -1.876038 |
| 17            | 1             | 0           | -3.301793               | 1.551430  | -0.957310 |
| 18            | 6             | 0           | -4.363218               | 0.133168  | 0.179234  |
| 19            | 6             | 0           | -5.109368               | -0.136334 | 1.082698  |
| 20            | 1             | 0           | -5.768745               | -0.378779 | 1.880338  |
| 21            | 8             | 0           | 3.341891                | -0.950370 | -0.496027 |
| 22            | 8             | 0           | -2.214833               | -0.218691 | -0.884706 |

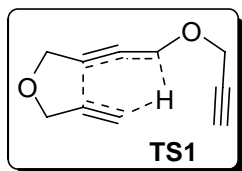

(Nimag=1)

-789.3510

| Center Number | Atomic Number | Atomic Type | Coordinates (Angstroms) |   |   |
|---------------|---------------|-------------|-------------------------|---|---|
|               |               |             | X                       | Y | Z |

|    |   |   |           |           |           |
|----|---|---|-----------|-----------|-----------|
| 1  | 6 | 0 | -1.756237 | 1.101152  | -0.187609 |
| 2  | 6 | 0 | -0.737958 | 1.811885  | -0.269039 |
| 3  | 1 | 0 | -0.262406 | 2.767999  | -0.333619 |
| 4  | 6 | 0 | -3.237689 | 0.948344  | -0.170151 |
| 5  | 1 | 0 | -3.610338 | 1.069378  | -1.198653 |
| 6  | 1 | 0 | -3.694632 | 1.713654  | 0.458860  |
| 7  | 6 | 0 | -2.834683 | -1.347836 | -0.166769 |
| 8  | 1 | 0 | -3.007436 | -2.229527 | 0.451464  |
| 9  | 1 | 0 | -3.126071 | -1.579493 | -1.202367 |
| 10 | 6 | 0 | -1.422212 | -0.926231 | -0.122001 |
| 11 | 6 | 0 | -0.193172 | -1.100203 | -0.076673 |
| 12 | 6 | 0 | 0.999163  | -0.360074 | -0.160016 |
| 13 | 1 | 0 | 0.448034  | 0.757416  | -0.238373 |
| 14 | 1 | 0 | 1.562024  | -0.470482 | -1.094138 |
| 15 | 6 | 0 | 2.970061  | 0.443819  | 0.893699  |
| 16 | 1 | 0 | 3.443051  | 0.380075  | 1.875552  |
| 17 | 1 | 0 | 2.658335  | 1.485930  | 0.740245  |
| 18 | 6 | 0 | 3.931337  | 0.062359  | -0.144831 |
| 19 | 6 | 0 | 4.729403  | -0.244500 | -0.989901 |
| 20 | 1 | 0 | 5.434453  | -0.520952 | -1.735799 |
| 21 | 8 | 0 | -3.647862 | -0.304688 | 0.357624  |
| 22 | 8 | 0 | 1.831226  | -0.408598 | 0.971947  |

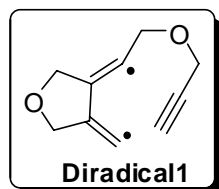

(Nimag=0)

| Center Number | Atomic Number | Atomic Type | Coordinates (Angstroms) |           |           |
|---------------|---------------|-------------|-------------------------|-----------|-----------|
|               |               |             | X                       | Y         | Z         |
| 1             | 6             | 0           | -1.816519               | 0.932262  | 0.282227  |
| 2             | 6             | 0           | -1.555963               | 2.117264  | 0.778428  |
| 3             | 1             | 0           | -2.053458               | 3.063468  | 0.921139  |
| 4             | 6             | 0           | -3.143083               | 0.498805  | -0.362592 |
| 5             | 1             | 0           | -3.174149               | 0.832493  | -1.410337 |
| 6             | 1             | 0           | -4.023876               | 0.869197  | 0.160849  |
| 7             | 6             | 0           | -1.796986               | -1.353169 | -0.459126 |
| 8             | 1             | 0           | -1.696170               | -2.339215 | -0.005383 |
| 9             | 1             | 0           | -1.543537               | -1.419453 | -1.527422 |
| 10            | 6             | 0           | -0.941154               | -0.269570 | 0.214701  |
| 11            | 6             | 0           | 0.300264                | -0.401029 | 0.625995  |

|    |   |   |           |           |           |
|----|---|---|-----------|-----------|-----------|
| 12 | 6 | 0 | 1.347780  | -1.434912 | 0.697309  |
| 13 | 1 | 0 | 0.909353  | -2.429485 | 0.532667  |
| 14 | 1 | 0 | 1.808178  | -1.443463 | 1.696733  |
| 15 | 6 | 0 | 3.315220  | -0.283779 | -0.070227 |
| 16 | 1 | 0 | 4.148511  | -0.503731 | -0.741836 |
| 17 | 1 | 0 | 3.694304  | -0.339682 | 0.960681  |
| 18 | 6 | 0 | 2.823839  | 1.071314  | -0.334379 |
| 19 | 6 | 0 | 2.467358  | 2.197107  | -0.560344 |
| 20 | 1 | 0 | 2.127599  | 3.185523  | -0.751910 |
| 21 | 8 | 0 | -3.141297 | -0.920984 | -0.289777 |
| 22 | 8 | 0 | 2.366137  | -1.319192 | -0.298614 |

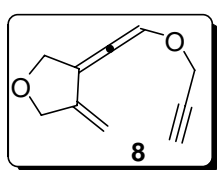

(Nimag=0)

| Center Number | Atomic Number | Atomic Type | Coordinates (Angstroms) |           |           |
|---------------|---------------|-------------|-------------------------|-----------|-----------|
|               |               |             | X                       | Y         | Z         |
| 1             | 6             | 0           | -2.380233               | 0.795846  | -0.221997 |
| 2             | 6             | 0           | -2.221814               | 2.112733  | -0.359173 |
| 3             | 1             | 0           | -3.072340               | 2.782592  | -0.417198 |
| 4             | 6             | 0           | -3.695316               | 0.044889  | -0.136712 |
| 5             | 1             | 0           | -4.118665               | -0.108390 | -1.141730 |
| 6             | 1             | 0           | -4.441720               | 0.540046  | 0.485808  |
| 7             | 6             | 0           | -2.061404               | -1.566632 | 0.050953  |
| 8             | 1             | 0           | -1.623474               | -2.212040 | 0.811943  |
| 9             | 1             | 0           | -2.087821               | -2.108624 | -0.906643 |
| 10            | 6             | 0           | -1.326023               | -0.240163 | -0.114920 |
| 11            | 6             | 0           | -0.028118               | -0.080731 | -0.145575 |
| 12            | 6             | 0           | 1.270573                | 0.036804  | -0.219314 |
| 13            | 1             | 0           | -1.234390               | 2.556580  | -0.416086 |
| 14            | 1             | 0           | 1.801094                | -0.034391 | -1.167055 |
| 15            | 6             | 0           | 3.359595                | 0.753769  | 0.645997  |
| 16            | 1             | 0           | 3.791166                | 0.915858  | 1.635217  |
| 17            | 1             | 0           | 3.266726                | 1.730507  | 0.154677  |
| 18            | 6             | 0           | 4.231216                | -0.118549 | -0.141620 |
| 19            | 6             | 0           | 4.959771                | -0.826626 | -0.783928 |
| 20            | 1             | 0           | 5.600871                | -1.458357 | -1.349509 |
| 21            | 8             | 0           | -3.379399               | -1.212220 | 0.461761  |
| 22            | 8             | 0           | 2.063032                | 0.203244  | 0.896777  |

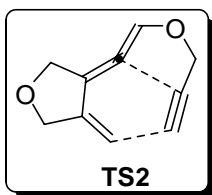

(Nimag=1) -464.6927

| Center Number | Atomic Number | Atomic Type | Coordinates (Angstroms) |           |           |
|---------------|---------------|-------------|-------------------------|-----------|-----------|
|               |               |             | X                       | Y         | Z         |
| 1             | 6             | 0           | -2.815698               | 0.372205  | -0.115927 |
| 2             | 6             | 0           | -1.605353               | -1.614336 | -0.307645 |
| 3             | 1             | 0           | -3.597360               | 0.309754  | 0.655472  |
| 4             | 1             | 0           | -3.101813               | 1.149064  | -0.830895 |
| 5             | 1             | 0           | -1.121689               | -2.131738 | -1.138773 |
| 6             | 1             | 0           | -1.948808               | -2.366870 | 0.418613  |
| 7             | 6             | 0           | -0.708802               | -0.590198 | 0.364607  |
| 8             | 6             | 0           | -1.457455               | 0.606152  | 0.508595  |
| 9             | 6             | 0           | -0.951094               | 1.792797  | 0.952250  |
| 10            | 1             | 0           | -0.085702               | 1.817482  | 1.597528  |
| 11            | 1             | 0           | -1.538839               | 2.703589  | 0.893759  |
| 12            | 6             | 0           | 0.634633                | -0.651298 | 0.482187  |
| 13            | 6             | 0           | 1.782060                | -1.194726 | 0.841058  |
| 14            | 1             | 0           | 1.928016                | -1.883088 | 1.664437  |
| 15            | 6             | 0           | 2.716536                | 0.084306  | -0.831600 |
| 16            | 1             | 0           | 3.639903                | 0.649365  | -0.958593 |
| 17            | 1             | 0           | 2.506757                | -0.485471 | -1.744208 |
| 18            | 6             | 0           | 1.564631                | 0.964154  | -0.531838 |
| 19            | 6             | 0           | 0.959520                | 2.037503  | -0.566895 |
| 20            | 1             | 0           | 0.691667                | 3.048365  | -0.764010 |
| 21            | 8             | 0           | -2.717017               | -0.872020 | -0.815035 |
| 22            | 8             | 0           | 2.956267                | -0.834205 | 0.244774  |

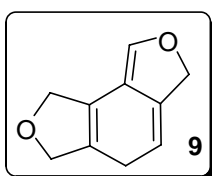

(Nimag=0)

| Center Number | Atomic Number | Atomic Type | Coordinates (Angstroms) |           |          |
|---------------|---------------|-------------|-------------------------|-----------|----------|
|               |               |             | X                       | Y         | Z        |
| 1             | 6             | 0           | 2.821625                | 0.465579  | 0.000211 |
| 2             | 6             | 0           | 1.704517                | -1.608331 | 0.000164 |

|    |   |   |           |           |           |
|----|---|---|-----------|-----------|-----------|
| 3  | 1 | 0 | 3.314782  | 0.889498  | -0.886655 |
| 4  | 1 | 0 | 3.314648  | 0.889529  | 0.887137  |
| 5  | 1 | 0 | 1.620143  | -2.249114 | 0.888200  |
| 6  | 1 | 0 | 1.620277  | -2.249151 | -0.887857 |
| 7  | 6 | 0 | 0.704208  | -0.487284 | 0.000066  |
| 8  | 6 | 0 | 1.339341  | 0.694601  | 0.000094  |
| 9  | 6 | 0 | 0.664647  | 2.035327  | 0.000019  |
| 10 | 1 | 0 | 0.998469  | 2.622674  | -0.870233 |
| 11 | 1 | 0 | 0.998333  | 2.622703  | 0.870304  |
| 12 | 6 | 0 | -0.736146 | -0.542410 | -0.000049 |
| 13 | 6 | 0 | -1.652419 | -1.530593 | -0.000111 |
| 14 | 1 | 0 | -1.537584 | -2.604487 | -0.000089 |
| 15 | 6 | 0 | -2.923364 | 0.362136  | -0.000224 |
| 16 | 1 | 0 | -3.458559 | 0.700873  | -0.890603 |
| 17 | 1 | 0 | -3.458682 | 0.700863  | 0.890084  |
| 18 | 6 | 0 | -1.457658 | 0.732486  | -0.000123 |
| 19 | 8 | 0 | 2.984609  | -0.959707 | 0.000249  |
| 20 | 6 | 0 | -0.846617 | 1.922956  | -0.000096 |
| 21 | 1 | 0 | -1.414981 | 2.848086  | -0.000154 |
| 22 | 8 | 0 | -2.947815 | -1.095077 | -0.000229 |

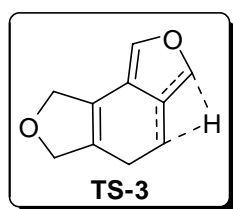

(Nimag=1) -879.5818

| Center Number | Atomic Number | Atomic Type | Coordinates (Angstroms) |           |           |
|---------------|---------------|-------------|-------------------------|-----------|-----------|
|               |               |             | X                       | Y         | Z         |
| 1             | 6             | 0           | 0.763928                | -0.550056 | 0.039133  |
| 2             | 6             | 0           | -0.671661               | -0.493298 | 0.022870  |
| 3             | 6             | 0           | -1.319745               | 0.682985  | 0.018701  |
| 4             | 6             | 0           | -0.682250               | 2.044075  | 0.079463  |
| 5             | 6             | 0           | 0.803373                | 1.987711  | -0.203030 |
| 6             | 6             | 0           | 1.510956                | 0.749758  | 0.012374  |
| 7             | 6             | 0           | 1.676569                | -1.541703 | 0.016267  |
| 8             | 6             | 0           | 2.893046                | 0.307753  | -0.080946 |
| 9             | 6             | 0           | -1.657458               | -1.628022 | -0.025738 |
| 10            | 6             | 0           | -2.796525               | 0.430395  | -0.021838 |
| 11            | 1             | 0           | 3.821681                | 0.841545  | 0.020197  |
| 12            | 1             | 0           | 1.588784                | -2.615817 | 0.022090  |
| 13            | 1             | 0           | -3.320478               | 0.854028  | 0.846824  |

|    |   |   |           |           |           |
|----|---|---|-----------|-----------|-----------|
| 14 | 1 | 0 | -3.262318 | 0.848897  | -0.926042 |
| 15 | 1 | 0 | -1.578163 | -2.297513 | 0.840987  |
| 16 | 1 | 0 | -1.551436 | -2.237039 | -0.934096 |
| 17 | 1 | 0 | -0.934009 | 2.504227  | 1.056502  |
| 18 | 1 | 0 | 1.788898  | 1.005471  | 1.101769  |
| 19 | 1 | 0 | 1.360095  | 2.916050  | -0.239501 |
| 20 | 1 | 0 | -1.167401 | 2.703140  | -0.656930 |
| 21 | 8 | 0 | -2.944596 | -0.995845 | -0.017318 |
| 22 | 8 | 0 | 2.961214  | -1.061728 | -0.017097 |

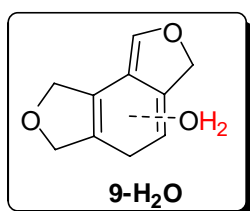

(Nimag=0)

| Center Number | Atomic Number | Atomic Type | Coordinates (Angstroms) |           |           |
|---------------|---------------|-------------|-------------------------|-----------|-----------|
|               |               |             | X                       | Y         | Z         |
| 1             | 6             | 0           | -2.940943               | 0.745891  | -0.101645 |
| 2             | 6             | 0           | -2.151827               | -1.353832 | 0.617771  |
| 3             | 1             | 0           | -3.207457               | 1.569553  | 0.575943  |
| 4             | 1             | 0           | -3.514539               | 0.882501  | -1.030046 |
| 5             | 1             | 0           | -2.323401               | -2.279698 | 0.052120  |
| 6             | 1             | 0           | -2.002574               | -1.625120 | 1.671390  |
| 7             | 6             | 0           | -1.015985               | -0.542869 | 0.060877  |
| 8             | 6             | 0           | -1.464024               | 0.654191  | -0.348470 |
| 9             | 6             | 0           | -0.616339               | 1.724851  | -0.972843 |
| 10            | 1             | 0           | -0.715950               | 2.664770  | -0.408043 |
| 11            | 1             | 0           | -1.000426               | 1.968356  | -1.976216 |
| 12            | 6             | 0           | 0.378113                | -0.886773 | -0.071077 |
| 13            | 6             | 0           | 1.128104                | -1.969019 | 0.221997  |
| 14            | 1             | 0           | 0.856590                | -2.918904 | 0.658816  |
| 15            | 6             | 0           | 2.639372                | -0.513858 | -0.665304 |
| 16            | 1             | 0           | 3.366498                | 0.016167  | -0.046383 |
| 17            | 1             | 0           | 3.046684                | -0.647212 | -1.670084 |
| 18            | 6             | 0           | 1.266524                | 0.119879  | -0.654629 |
| 19            | 8             | 0           | -3.301213               | -0.503282 | 0.504353  |
| 20            | 6             | 0           | 0.843744                | 1.324375  | -1.066956 |
| 21            | 1             | 0           | 1.530822                | 2.041207  | -1.506483 |
| 22            | 8             | 0           | 2.448039                | -1.839124 | -0.088508 |
| 23            | 8             | 0           | 2.331587                | 2.196220  | 1.812234  |
| 24            | 1             | 0           | 1.966193                | 1.838376  | 2.627053  |



25            1            0            1.769828    1.842467    1.108977

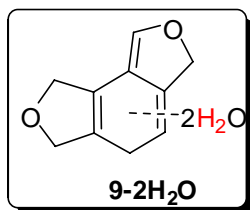

(Nimag=0)

| Center Number | Atomic Number | Atomic Type | Coordinates (Angstroms) |           |           |
|---------------|---------------|-------------|-------------------------|-----------|-----------|
|               |               |             | X                       | Y         | Z         |
| 1             | 6             | 0           | -0.198546               | 1.043801  | 0.062685  |
| 2             | 6             | 0           | -1.503175               | 0.465745  | -0.142851 |
| 3             | 6             | 0           | -1.810153               | -0.729711 | 0.383795  |
| 4             | 6             | 0           | -0.883762               | -1.566658 | 1.218518  |
| 5             | 6             | 0           | 0.496194                | -0.945099 | 1.349486  |
| 6             | 6             | 0           | 0.769787                | 0.265734  | 0.834491  |
| 7             | 6             | 0           | 0.408034                | 2.192157  | -0.306717 |
| 8             | 6             | 0           | 2.014665                | 1.120411  | 0.900806  |
| 9             | 6             | 0           | -2.679499               | 1.008681  | -0.903482 |
| 10            | 6             | 0           | -3.222117               | -1.087158 | 0.024505  |
| 11            | 1             | 0           | 2.902808                | 0.661550  | 0.460685  |
| 12            | 1             | 0           | 2.241300                | 1.451162  | 1.917632  |
| 13            | 1             | 0           | 0.040971                | 3.025052  | -0.889086 |
| 14            | 1             | 0           | -3.288785               | -2.016319 | -0.560069 |
| 15            | 1             | 0           | -3.865217               | -1.206601 | 0.908814  |
| 16            | 1             | 0           | -2.458771               | 1.162985  | -1.968029 |
| 17            | 1             | 0           | -3.043804               | 1.959810  | -0.492301 |
| 18            | 1             | 0           | -0.814315               | -2.583579 | 0.800161  |
| 19            | 8             | 0           | 2.064669                | -2.041353 | -1.359052 |
| 20            | 1             | 0           | 1.884279                | -2.986344 | -1.363187 |
| 21            | 1             | 0           | 1.484673                | -1.662550 | -0.678513 |
| 22            | 1             | 0           | 1.235375                | -1.483058 | 1.935734  |
| 23            | 1             | 0           | -1.317998               | -1.718938 | 2.220072  |
| 24            | 8             | 0           | -3.699236               | 0.008253  | -0.768424 |
| 25            | 8             | 0           | 1.689724                | 2.314407  | 0.121931  |
| 26            | 8             | 0           | 4.432754                | -0.720111 | -0.564372 |
| 27            | 1             | 0           | 3.742860                | -1.267293 | -0.978532 |
| 28            | 1             | 0           | 5.004770                | -0.432863 | -1.281448 |

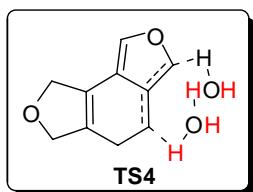

(Nimag=1) -1239.4115

| Center Number | Atomic Number | Atomic Type | Coordinates (Angstroms) |           |           |
|---------------|---------------|-------------|-------------------------|-----------|-----------|
|               |               |             | X                       | Y         | Z         |
| 1             | 6             | 0           | -0.072591               | 1.039876  | 0.143728  |
| 2             | 6             | 0           | -1.404138               | 0.519343  | -0.093264 |
| 3             | 6             | 0           | -1.737576               | -0.696301 | 0.357698  |
| 4             | 6             | 0           | -0.835384               | -1.597028 | 1.151244  |
| 5             | 6             | 0           | 0.647966                | -1.171845 | 1.073865  |
| 6             | 6             | 0           | 0.886309                | 0.216492  | 0.782210  |
| 7             | 6             | 0           | 0.566549                | 2.227892  | -0.133412 |
| 8             | 6             | 0           | 2.145174                | 0.941512  | 0.779259  |
| 9             | 6             | 0           | -2.560437               | 1.142627  | -0.821824 |
| 10            | 6             | 0           | -3.157968               | -0.990338 | -0.023900 |
| 11            | 1             | 0           | 2.872051                | 0.386116  | 0.014470  |
| 12            | 1             | 0           | 2.699115                | 1.047927  | 1.711419  |
| 13            | 1             | 0           | 0.204344                | 3.123457  | -0.619435 |
| 14            | 1             | 0           | -3.230318               | -1.850927 | -0.704251 |
| 15            | 1             | 0           | -3.798838               | -1.195452 | 0.844249  |
| 16            | 1             | 0           | -2.343449               | 1.308298  | -1.886671 |
| 17            | 1             | 0           | -2.875523               | 2.101103  | -0.387915 |
| 18            | 1             | 0           | -0.930524               | -2.628641 | 0.794557  |
| 19            | 8             | 0           | 1.869827                | -2.150945 | -1.164711 |
| 20            | 1             | 0           | 2.139499                | -3.073605 | -1.204984 |
| 21            | 1             | 0           | 1.146922                | -1.686178 | 0.105808  |
| 22            | 1             | 0           | 1.254933                | -1.563794 | 1.892746  |
| 23            | 1             | 0           | -1.182895               | -1.612084 | 2.194590  |
| 24            | 8             | 0           | -3.625436               | 0.194049  | -0.685043 |
| 25            | 8             | 0           | 1.834161                | 2.253275  | 0.255529  |
| 26            | 8             | 0           | 3.700532                | -0.604801 | -0.823640 |
| 27            | 1             | 0           | 2.868536                | -1.407156 | -1.059681 |
| 28            | 1             | 0           | 4.076044                | -0.275058 | -1.645599 |

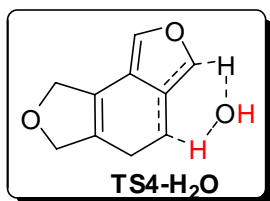

(Nimag=1) -1710.1429

| Center<br>Number | Atomic<br>Number | Atomic<br>Type | Coordinates (Angstroms) |           |           |
|------------------|------------------|----------------|-------------------------|-----------|-----------|
|                  |                  |                | X                       | Y         | Z         |
| 1                | 6                | 0              | -0.291568               | 0.890208  | -0.203358 |
| 2                | 6                | 0              | 1.098837                | 0.518446  | -0.031071 |
| 3                | 6                | 0              | 1.473109                | -0.762178 | -0.157942 |
| 4                | 6                | 0              | 0.568871                | -1.908498 | -0.516840 |
| 5                | 6                | 0              | -0.915624               | -1.509182 | -0.596204 |
| 6                | 6                | 0              | -1.213405               | -0.116947 | -0.607433 |
| 7                | 6                | 0              | -1.037868               | 2.014596  | 0.046560  |
| 8                | 6                | 0              | -2.535166               | 0.439903  | -0.443299 |
| 9                | 6                | 0              | 2.280523                | 1.375216  | 0.322744  |
| 10               | 6                | 0              | 2.949048                | -0.870570 | 0.091253  |
| 11               | 1                | 0              | -2.847124               | -0.280161 | 0.520308  |
| 12               | 1                | 0              | -3.326832               | 0.316861  | -1.177777 |
| 13               | 1                | 0              | -0.744830               | 3.001521  | 0.375043  |
| 14               | 1                | 0              | 3.181397                | -1.517996 | 0.948646  |
| 15               | 1                | 0              | 3.495275                | -1.262254 | -0.778374 |
| 16               | 1                | 0              | 2.169746                | 1.866137  | 1.299902  |
| 17               | 1                | 0              | 2.477197                | 2.155364  | -0.425126 |
| 18               | 1                | 0              | 0.699357                | -2.722241 | 0.208539  |
| 19               | 8                | 0              | -2.850935               | -1.591126 | 1.233487  |
| 20               | 1                | 0              | -2.621888               | -1.453968 | 2.159352  |
| 21               | 1                | 0              | -1.644431               | -1.705357 | 0.436576  |
| 22               | 1                | 0              | -1.505132               | -2.121730 | -1.281509 |
| 23               | 1                | 0              | 0.902139                | -2.328879 | -1.476276 |
| 24               | 8                | 0              | 3.388090                | 0.467140  | 0.366672  |
| 25               | 8                | 0              | -2.349082               | 1.827329  | -0.129629 |

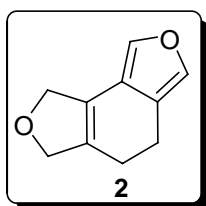

(Nimag=0)

| Center<br>Number | Atomic<br>Number | Atomic<br>Type | Coordinates (Angstroms) |           |           |
|------------------|------------------|----------------|-------------------------|-----------|-----------|
|                  |                  |                | X                       | Y         | Z         |
| 1                | 6                | 0              | 2.779823                | 0.460117  | -0.088668 |
| 2                | 6                | 0              | 1.681661                | -1.611932 | 0.143803  |
| 3                | 1                | 0              | 3.249510                | 0.782320  | -1.029987 |
| 4                | 1                | 0              | 3.288149                | 0.987434  | 0.731118  |

|    |   |   |           |           |           |
|----|---|---|-----------|-----------|-----------|
| 5  | 1 | 0 | 1.608965  | -2.167204 | 1.088067  |
| 6  | 1 | 0 | 1.598825  | -2.334802 | -0.679672 |
| 7  | 6 | 0 | 0.672161  | -0.504545 | 0.040796  |
| 8  | 6 | 0 | 1.295433  | 0.675868  | -0.085349 |
| 9  | 6 | 0 | 0.581883  | 1.983779  | -0.291638 |
| 10 | 1 | 0 | 0.516344  | 2.182191  | -1.370869 |
| 11 | 1 | 0 | 1.157141  | 2.812618  | 0.133243  |
| 12 | 6 | 0 | -0.773851 | -0.572104 | 0.021099  |
| 13 | 6 | 0 | -1.686359 | -1.575453 | -0.108251 |
| 14 | 1 | 0 | -1.612938 | -2.644565 | -0.214313 |
| 15 | 6 | 0 | -2.833640 | 0.299278  | 0.004230  |
| 16 | 1 | 0 | -3.761617 | 0.846118  | 0.017983  |
| 17 | 6 | 0 | -1.530336 | 0.657951  | 0.094943  |
| 18 | 6 | 0 | -0.839541 | 1.972875  | 0.326199  |
| 19 | 1 | 0 | -1.426570 | 2.808218  | -0.063309 |
| 20 | 1 | 0 | -0.745522 | 2.130417  | 1.407967  |
| 21 | 8 | 0 | -2.950245 | -1.060736 | -0.121105 |
| 22 | 8 | 0 | 2.955784  | -0.953983 | 0.075703  |

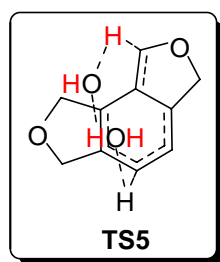

(Nimag=1) -984.3528

| Center Number | Atomic Number | Atomic Type | Coordinates (Angstroms) |           |           |
|---------------|---------------|-------------|-------------------------|-----------|-----------|
|               |               |             | X                       | Y         | Z         |
| 1             | 6             | 0           | 0.622898                | -0.741955 | -0.384190 |
| 2             | 6             | 0           | -0.797876               | -0.723034 | -0.301714 |
| 3             | 6             | 0           | -1.483878               | 0.421619  | -0.618646 |
| 4             | 6             | 0           | -0.832191               | 1.633527  | -0.988160 |
| 5             | 6             | 0           | 0.569429                | 1.527930  | -1.315931 |
| 6             | 6             | 0           | 1.262752                | 0.394995  | -1.009120 |
| 7             | 6             | 0           | 1.608294                | -1.541393 | 0.174329  |
| 8             | 6             | 0           | 2.737990                | 0.063839  | -1.075155 |
| 9             | 6             | 0           | -1.752036               | -1.777518 | 0.174395  |
| 10            | 6             | 0           | -2.951238               | 0.177747  | -0.396715 |
| 11            | 1             | 0           | 3.386224                | 0.864142  | -0.701050 |
| 12            | 1             | 0           | 3.071111                | -0.195745 | -2.090319 |
| 13            | 1             | 0           | 1.566805                | -2.589474 | 0.438218  |
| 14            | 1             | 0           | -3.383888               | 0.863970  | 0.343609  |

|    |   |   |           |           |           |
|----|---|---|-----------|-----------|-----------|
| 15 | 1 | 0 | -3.530391 | 0.275395  | -1.324544 |
| 16 | 1 | 0 | -1.567082 | -2.082020 | 1.214903  |
| 17 | 1 | 0 | -1.734977 | -2.683226 | -0.446535 |
| 18 | 1 | 0 | -0.522021 | 1.953358  | 0.601340  |
| 19 | 1 | 0 | 0.251239  | 2.846454  | 1.778609  |
| 20 | 8 | 0 | -0.220161 | 2.013661  | 1.652735  |
| 21 | 1 | 0 | 1.261918  | -0.617769 | 1.620515  |
| 22 | 1 | 0 | 1.074116  | 2.387446  | -1.748979 |
| 23 | 1 | 0 | -1.411703 | 2.459950  | -1.386992 |
| 24 | 8 | 0 | -3.052136 | -1.169134 | 0.085696  |
| 25 | 8 | 0 | 2.898674  | -1.096572 | -0.227847 |
| 26 | 8 | 0 | 1.047743  | 0.073902  | 2.391207  |
| 27 | 1 | 0 | 1.840166  | 0.191377  | 2.926746  |
| 28 | 1 | 0 | 0.400655  | 1.136744  | 2.005593  |

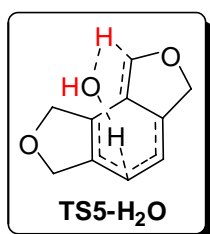

(Nimag=1) -1093.5725

| Center Number | Atomic Number | Atomic Type | Coordinates (Angstroms) |           |           |
|---------------|---------------|-------------|-------------------------|-----------|-----------|
|               |               |             | X                       | Y         | Z         |
| 1             | 6             | 0           | 0.625763                | -0.632317 | -0.346660 |
| 2             | 6             | 0           | -0.796497               | -0.542736 | -0.369371 |
| 3             | 6             | 0           | -1.357723               | 0.699761  | -0.248018 |
| 4             | 6             | 0           | -0.559155               | 1.877828  | -0.112055 |
| 5             | 6             | 0           | 0.801964                | 1.780286  | -0.589216 |
| 6             | 6             | 0           | 1.374420                | 0.553160  | -0.734677 |
| 7             | 6             | 0           | 1.518253                | -1.462363 | 0.315770  |
| 8             | 6             | 0           | 2.819281                | 0.119960  | -0.764833 |
| 9             | 6             | 0           | -1.855036               | -1.595198 | -0.212209 |
| 10            | 6             | 0           | -2.842199               | 0.539353  | -0.066518 |
| 11            | 1             | 0           | 3.518679                | 0.864386  | -0.377149 |
| 12            | 1             | 0           | 3.158892                | -0.196028 | -1.760774 |
| 13            | 1             | 0           | 1.423218                | -2.497480 | 0.613329  |
| 14            | 1             | 0           | -3.170257               | 0.883863  | 0.925592  |
| 15            | 1             | 0           | -3.426810               | 1.077609  | -0.820996 |
| 16            | 1             | 0           | -1.750150               | -2.155546 | 0.731642  |
| 17            | 1             | 0           | -1.882150               | -2.321778 | -1.031464 |
| 18            | 1             | 0           | -0.032036               | 1.263363  | 1.365380  |
| 19            | 1             | 0           | 1.112948                | 0.958593  | 2.599504  |

|    |   |   |           |           |           |
|----|---|---|-----------|-----------|-----------|
| 20 | 8 | 0 | 0.427206  | 0.523166  | 2.072377  |
| 21 | 1 | 0 | 0.853385  | -0.349514 | 1.561361  |
| 22 | 1 | 0 | 1.385521  | 2.688521  | -0.707683 |
| 23 | 1 | 0 | -1.038550 | 2.850035  | -0.078140 |
| 24 | 8 | 0 | -3.092159 | -0.865110 | -0.212136 |
| 25 | 8 | 0 | 2.849064  | -1.044610 | 0.108024  |

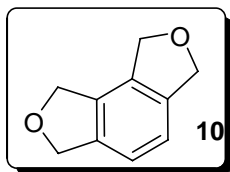

(Nimag=0)

| Center Number | Atomic Number | Atomic Type | Coordinates (Angstroms) |           |           |
|---------------|---------------|-------------|-------------------------|-----------|-----------|
|               |               |             | X                       | Y         | Z         |
| 1             | 6             | 0           | -2.857068               | 0.479723  | 0.063654  |
| 2             | 6             | 0           | -1.692831               | -1.571762 | 0.034655  |
| 3             | 1             | 0           | -3.299921               | 0.763270  | 1.029156  |
| 4             | 1             | 0           | -3.421216               | 0.979336  | -0.730061 |
| 5             | 1             | 0           | -1.559819               | -2.293628 | -0.778078 |
| 6             | 1             | 0           | -1.662810               | -2.122600 | 0.986442  |
| 7             | 6             | 0           | -0.693686               | -0.447003 | 0.007591  |
| 8             | 6             | 0           | -1.379061               | 0.767074  | 0.020379  |
| 9             | 6             | 0           | 0.693691                | -0.447025 | -0.007000 |
| 10            | 6             | 0           | 1.692596                | -1.571925 | -0.033723 |
| 11            | 1             | 0           | 1.560556                | -2.292239 | 0.780597  |
| 12            | 6             | 0           | 2.857062                | 0.479923  | -0.063358 |
| 13            | 1             | 0           | 3.420625                | 0.978309  | 0.731602  |
| 14            | 1             | 0           | 3.300481                | 0.765235  | -1.028027 |
| 15            | 6             | 0           | 1.379064                | 0.767036  | -0.020132 |
| 16            | 6             | 0           | 0.699165                | 1.981995  | -0.011650 |
| 17            | 1             | 0           | 1.241047                | 2.921536  | -0.023731 |
| 18            | 8             | 0           | 2.968960                | -0.938638 | 0.126306  |
| 19            | 6             | 0           | -0.699165               | 1.982020  | 0.011607  |
| 20            | 1             | 0           | -1.241016               | 2.921583  | 0.023347  |
| 21            | 1             | 0           | 1.661102                | -2.124577 | -0.984358 |
| 22            | 8             | 0           | -2.968663               | -0.938432 | -0.128684 |

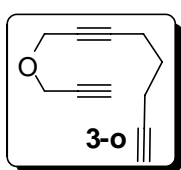

(Nimag=0)

| Center Number | Atomic Number | Atomic Type | Coordinates (Angstroms) |           |           |
|---------------|---------------|-------------|-------------------------|-----------|-----------|
|               |               |             | X                       | Y         | Z         |
| 1             | 6             | 0           | -3.152370               | 1.386627  | -0.274547 |
| 2             | 6             | 0           | -2.671275               | 2.485424  | -0.197386 |
| 3             | 1             | 0           | -2.229271               | 3.449066  | -0.126565 |
| 4             | 6             | 0           | -3.820256               | 0.085579  | -0.369121 |
| 5             | 1             | 0           | -3.722227               | -0.307890 | -1.389818 |
| 6             | 1             | 0           | -4.886988               | 0.225711  | -0.172287 |
| 7             | 6             | 0           | -2.330941               | -1.743371 | 0.133783  |
| 8             | 1             | 0           | -2.261128               | -2.513684 | 0.905460  |
| 9             | 1             | 0           | -2.636114               | -2.238559 | -0.799949 |
| 10            | 6             | 0           | -1.027222               | -1.107092 | -0.055100 |
| 11            | 6             | 0           | 0.056671                | -0.608367 | -0.221545 |
| 12            | 6             | 0           | 1.359190                | 0.025377  | -0.394688 |
| 13            | 6             | 0           | 2.164403                | 0.120022  | 0.914710  |
| 14            | 1             | 0           | 1.210265                | 1.031068  | -0.807802 |
| 15            | 1             | 0           | 1.938870                | -0.528432 | -1.141219 |
| 16            | 6             | 0           | 3.529280                | 0.814766  | 0.733734  |
| 17            | 1             | 0           | 1.584431                | 0.679052  | 1.654273  |
| 18            | 1             | 0           | 2.316734                | -0.883804 | 1.319955  |
| 19            | 1             | 0           | 4.005192                | 0.926774  | 1.713835  |
| 20            | 1             | 0           | 3.377719                | 1.830988  | 0.349839  |
| 21            | 6             | 0           | 4.443696                | 0.101468  | -0.155329 |
| 22            | 6             | 0           | 5.189278                | -0.497740 | -0.884863 |
| 23            | 1             | 0           | 5.852795                | -1.022888 | -1.527486 |
| 24            | 8             | 0           | -3.374125               | -0.877945 | 0.580484  |

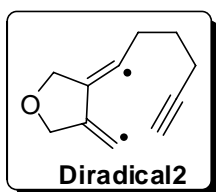

(Nimag=0)

| Center Number | Atomic Number | Atomic Type | Coordinates (Angstroms) |          |           |
|---------------|---------------|-------------|-------------------------|----------|-----------|
|               |               |             | X                       | Y        | Z         |
| 1             | 6             | 0           | 1.754804                | 0.934845 | -0.232895 |
| 2             | 6             | 0           | 1.402931                | 2.129019 | -0.643181 |
| 3             | 1             | 0           | 1.846611                | 3.104349 | -0.766002 |
| 4             | 6             | 0           | 3.143919                | 0.550203 | 0.301483  |
| 5             | 1             | 0           | 3.226630                | 0.833464 | 1.361456  |
| 6             | 1             | 0           | 3.965362                | 0.998630 | -0.256506 |

|    |   |   |           |           |           |
|----|---|---|-----------|-----------|-----------|
| 7  | 6 | 0 | 1.917618  | -1.384077 | 0.383854  |
| 8  | 1 | 0 | 1.844364  | -2.347602 | -0.121461 |
| 9  | 1 | 0 | 1.746685  | -1.528098 | 1.461670  |
| 10 | 6 | 0 | 0.955766  | -0.321243 | -0.171800 |
| 11 | 6 | 0 | -0.296992 | -0.513832 | -0.516333 |
| 12 | 6 | 0 | -1.318375 | -1.567495 | -0.580361 |
| 13 | 1 | 0 | -0.862944 | -2.536528 | -0.313797 |
| 14 | 1 | 0 | -1.666023 | -1.674519 | -1.617025 |
| 15 | 6 | 0 | -2.543288 | -1.343014 | 0.331727  |
| 16 | 1 | 0 | -3.179249 | -2.231739 | 0.266707  |
| 17 | 1 | 0 | -2.216445 | -1.255893 | 1.371598  |
| 18 | 6 | 0 | -3.402886 | -0.116643 | -0.038539 |
| 19 | 1 | 0 | -4.344910 | -0.168944 | 0.518664  |
| 20 | 1 | 0 | -3.673152 | -0.168148 | -1.100339 |
| 21 | 6 | 0 | -2.774795 | 1.173182  | 0.234523  |
| 22 | 6 | 0 | -2.278333 | 2.241707  | 0.476833  |
| 23 | 1 | 0 | -1.815696 | 3.176368  | 0.677945  |
| 24 | 8 | 0 | 3.220819  | -0.862157 | 0.155652  |

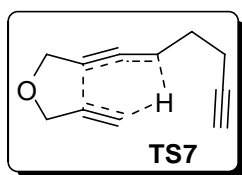

(Nimag=1) -768.1146

| Center Number | Atomic Number | Atomic Type | Coordinates (Angstroms) |           |           |
|---------------|---------------|-------------|-------------------------|-----------|-----------|
|               |               |             | X                       | Y         | Z         |
| 1             | 6             | 0           | -1.694171               | 1.112888  | -0.098749 |
| 2             | 6             | 0           | -0.635135               | 1.769641  | -0.102971 |
| 3             | 1             | 0           | -0.117499               | 2.705103  | -0.060288 |
| 4             | 6             | 0           | -3.183897               | 1.063216  | -0.088463 |
| 5             | 1             | 0           | -3.545511               | 1.279208  | -1.105369 |
| 6             | 1             | 0           | -3.588915               | 1.812747  | 0.592824  |
| 7             | 6             | 0           | -2.946692               | -1.247686 | -0.263033 |
| 8             | 1             | 0           | -3.158624               | -2.155554 | 0.302956  |
| 9             | 1             | 0           | -3.285652               | -1.391242 | -1.300081 |
| 10            | 6             | 0           | -1.509498               | -0.909969 | -0.240330 |
| 11            | 6             | 0           | -0.289691               | -1.147059 | -0.262742 |
| 12            | 6             | 0           | 0.958315                | -0.502622 | -0.247722 |
| 13            | 6             | 0           | 1.886151                | -0.706289 | 0.951933  |
| 14            | 1             | 0           | 0.487190                | 0.649253  | -0.197517 |
| 15            | 1             | 0           | 1.495685                | -0.530662 | -1.200061 |
| 16            | 6             | 0           | 3.058501                | 0.296953  | 0.987394  |



|    |   |   |           |           |           |
|----|---|---|-----------|-----------|-----------|
| 17 | 1 | 0 | 1.308992  | -0.603176 | 1.874889  |
| 18 | 1 | 0 | 2.287708  | -1.723417 | 0.933605  |
| 19 | 1 | 0 | 3.630677  | 0.140007  | 1.907931  |
| 20 | 1 | 0 | 2.667002  | 1.319230  | 1.039231  |
| 21 | 6 | 0 | 3.963748  | 0.189113  | -0.154307 |
| 22 | 6 | 0 | 4.705230  | 0.088040  | -1.096187 |
| 23 | 1 | 0 | 5.363601  | 0.002884  | -1.925781 |
| 24 | 8 | 0 | -3.677726 | -0.192717 | 0.353591  |

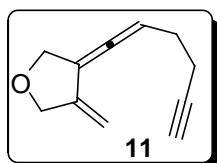

(Nimag=0)

| Center Number | Atomic Number | Atomic Type | Coordinates (Angstroms) |           |           |
|---------------|---------------|-------------|-------------------------|-----------|-----------|
|               |               |             | X                       | Y         | Z         |
| 1             | 6             | 0           | -2.141451               | 0.950076  | -0.061067 |
| 2             | 6             | 0           | -1.684012               | 2.197795  | 0.054543  |
| 3             | 1             | 0           | -2.358666               | 3.036654  | 0.182893  |
| 4             | 6             | 0           | -3.597629               | 0.520810  | -0.049955 |
| 5             | 1             | 0           | -4.055419               | 0.688475  | -1.037293 |
| 6             | 1             | 0           | -4.197456               | 1.029999  | 0.705485  |
| 7             | 6             | 0           | -2.398525               | -1.424474 | -0.309771 |
| 8             | 1             | 0           | -2.125945               | -2.313016 | 0.259572  |
| 9             | 1             | 0           | -2.570691               | -1.710700 | -1.358432 |
| 10            | 6             | 0           | -1.368401               | -0.301892 | -0.225594 |
| 11            | 6             | 0           | -0.069062               | -0.445092 | -0.283441 |
| 12            | 6             | 0           | 1.226215                | -0.592552 | -0.340745 |
| 13            | 6             | 0           | 2.123243                | -0.817095 | 0.855790  |
| 14            | 1             | 0           | -0.622720               | 2.415868  | 0.020610  |
| 15            | 1             | 0           | 1.720045                | -0.552684 | -1.312027 |
| 16            | 6             | 0           | 3.230904                | 0.255592  | 0.995365  |
| 17            | 1             | 0           | 1.524872                | -0.824041 | 1.769519  |
| 18            | 1             | 0           | 2.600940                | -1.799303 | 0.767898  |
| 19            | 1             | 0           | 3.786561                | 0.069279  | 1.920959  |
| 20            | 1             | 0           | 2.769065                | 1.243208  | 1.100458  |
| 21            | 6             | 0           | 4.169986                | 0.278492  | -0.122902 |
| 22            | 6             | 0           | 4.939728                | 0.280542  | -1.047302 |
| 23            | 1             | 0           | 5.623589                | 0.289449  | -1.860460 |
| 24            | 8             | 0           | -3.585020               | -0.873299 | 0.256412  |

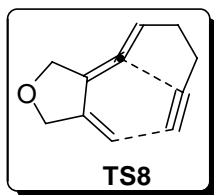

(Nimag=1) -518.9843

| Center Number | Atomic Number | Atomic Type | Coordinates (Angstroms) |           |           |
|---------------|---------------|-------------|-------------------------|-----------|-----------|
|               |               |             | X                       | Y         | Z         |
| 1             | 6             | 0           | -2.815656               | 0.359450  | -0.104407 |
| 2             | 6             | 0           | -1.604059               | -1.622555 | -0.332364 |
| 3             | 1             | 0           | -3.607903               | 0.281345  | 0.654919  |
| 4             | 1             | 0           | -3.090690               | 1.154057  | -0.804651 |
| 5             | 1             | 0           | -1.108407               | -2.112502 | -1.173353 |
| 6             | 1             | 0           | -1.954674               | -2.398324 | 0.365237  |
| 7             | 6             | 0           | -0.721048               | -0.614258 | 0.382386  |
| 8             | 6             | 0           | -1.463103               | 0.576356  | 0.537305  |
| 9             | 6             | 0           | -0.938906               | 1.765872  | 0.969745  |
| 10            | 1             | 0           | -0.106114               | 1.783970  | 1.657081  |
| 11            | 1             | 0           | -1.525674               | 2.677499  | 0.909869  |
| 12            | 6             | 0           | 0.623114                | -0.691574 | 0.504549  |
| 13            | 6             | 0           | 1.771403                | -1.198371 | 0.899503  |
| 14            | 1             | 0           | 1.820476                | -1.888799 | 1.739205  |
| 15            | 6             | 0           | 3.048914                | -0.752873 | 0.234740  |
| 16            | 6             | 0           | 2.668750                | 0.150773  | -0.951548 |
| 17            | 1             | 0           | 3.646471                | -1.606610 | -0.101839 |
| 18            | 1             | 0           | 3.666779                | -0.204669 | 0.957065  |
| 19            | 1             | 0           | 3.507604                | 0.785711  | -1.250661 |
| 20            | 1             | 0           | 2.405696                | -0.473425 | -1.812150 |
| 21            | 6             | 0           | 1.497301                | 0.983680  | -0.596595 |
| 22            | 6             | 0           | 0.841180                | 2.027395  | -0.513161 |
| 23            | 1             | 0           | 0.595935                | 3.051144  | -0.678542 |
| 24            | 8             | 0           | -2.712103               | -0.869095 | -0.830387 |

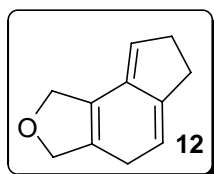

(Nimag=0)

| Center Number | Atomic Number | Atomic Type | Coordinates (Angstroms) |   |   |
|---------------|---------------|-------------|-------------------------|---|---|
|               |               |             | X                       | Y | Z |

|    |   |   |           |           |           |
|----|---|---|-----------|-----------|-----------|
| 1  | 6 | 0 | 2.849186  | 0.432367  | 0.000234  |
| 2  | 6 | 0 | 1.694314  | -1.620704 | 0.000072  |
| 3  | 1 | 0 | 3.348638  | 0.849334  | -0.886281 |
| 4  | 1 | 0 | 3.348122  | 0.848621  | 0.887399  |
| 5  | 1 | 0 | 1.599341  | -2.259587 | 0.888100  |
| 6  | 1 | 0 | 1.599120  | -2.260144 | -0.887504 |
| 7  | 6 | 0 | 0.713836  | -0.482179 | -0.000065 |
| 8  | 6 | 0 | 1.370751  | 0.686668  | 0.000016  |
| 9  | 6 | 0 | 0.712980  | 2.031379  | 0.000057  |
| 10 | 1 | 0 | 1.054984  | 2.613886  | -0.869934 |
| 11 | 1 | 0 | 1.054946  | 2.613829  | 0.870103  |
| 12 | 6 | 0 | -0.733055 | -0.525896 | -0.000058 |
| 13 | 6 | 0 | -1.604896 | -1.554583 | 0.000053  |
| 14 | 1 | 0 | -1.335973 | -2.604455 | 0.000113  |
| 15 | 6 | 0 | -3.038501 | -1.081184 | 0.000216  |
| 16 | 6 | 0 | -2.931465 | 0.473791  | -0.000243 |
| 17 | 1 | 0 | -3.583066 | -1.453213 | 0.875974  |
| 18 | 1 | 0 | -3.583509 | -1.453734 | -0.875037 |
| 19 | 1 | 0 | -3.416664 | 0.907204  | -0.878598 |
| 20 | 1 | 0 | -3.417073 | 0.907830  | 0.877572  |
| 21 | 6 | 0 | -1.439732 | 0.764269  | -0.000065 |
| 22 | 8 | 0 | 2.987234  | -0.994799 | -0.000417 |
| 23 | 6 | 0 | -0.796570 | 1.938444  | 0.000017  |
| 24 | 1 | 0 | -1.347830 | 2.874578  | 0.000021  |

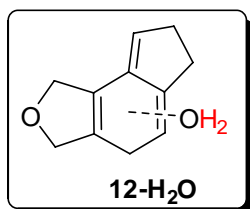

(Nimag=0)

| Center Number | Atomic Number | Atomic Type | Coordinates (Angstroms) |           |           |
|---------------|---------------|-------------|-------------------------|-----------|-----------|
|               |               |             | X                       | Y         | Z         |
| 1             | 6             | 0           | 0.501309                | -0.826520 | -0.079746 |
| 2             | 6             | 0           | -0.924376               | -0.594820 | 0.019563  |
| 3             | 6             | 0           | -1.471618               | 0.552585  | -0.408271 |
| 4             | 6             | 0           | -0.706544               | 1.683971  | -1.021880 |
| 5             | 6             | 0           | 0.778680                | 1.403725  | -1.098978 |
| 6             | 6             | 0           | 1.312485                | 0.248098  | -0.674989 |
| 7             | 6             | 0           | 1.277226                | -1.867542 | 0.284977  |
| 8             | 6             | 0           | 2.756680                | -0.223981 | -0.704639 |
| 9             | 6             | 0           | -1.993298               | -1.501221 | 0.561896  |

|    |   |   |           |           |           |
|----|---|---|-----------|-----------|-----------|
| 10 | 6 | 0 | -2.955459 | 0.513490  | -0.189429 |
| 11 | 1 | 0 | 3.419057  | 0.473813  | -0.187156 |
| 12 | 1 | 0 | 3.113834  | -0.298134 | -1.735226 |
| 13 | 1 | 0 | 0.921938  | -2.780587 | 0.748260  |
| 14 | 1 | 0 | -3.305456 | 1.314493  | 0.476968  |
| 15 | 1 | 0 | -3.519844 | 0.594770  | -1.129713 |
| 16 | 1 | 0 | -1.842548 | -1.749935 | 1.620653  |
| 17 | 1 | 0 | -2.068552 | -2.443044 | 0.002102  |
| 18 | 1 | 0 | -0.888509 | 2.611873  | -0.458424 |
| 19 | 1 | 0 | 1.119299  | 1.698846  | 2.705618  |
| 20 | 8 | 0 | 1.587054  | 2.266697  | 2.085731  |
| 21 | 1 | 0 | 1.407309  | 1.881322  | 1.216896  |
| 22 | 1 | 0 | 1.404203  | 2.175781  | -1.538337 |
| 23 | 1 | 0 | -1.097410 | 1.894884  | -2.029590 |
| 24 | 8 | 0 | -3.213828 | -0.759466 | 0.417600  |
| 25 | 6 | 0 | 2.735347  | -1.620779 | -0.015348 |
| 26 | 1 | 0 | 3.335664  | -1.631312 | 0.902044  |
| 27 | 1 | 0 | 3.152629  | -2.402659 | -0.659681 |

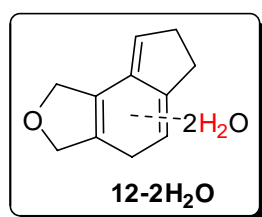

(Nimag=0)

| Center Number | Atomic Number | Atomic Type | Coordinates (Angstroms) |           |           |
|---------------|---------------|-------------|-------------------------|-----------|-----------|
|               |               |             | X                       | Y         | Z         |
| 1             | 6             | 0           | 0.892164                | -0.792328 | 0.039331  |
| 2             | 6             | 0           | -0.542812               | -0.984263 | 0.042300  |
| 3             | 6             | 0           | -1.331366               | -0.292433 | -0.793643 |
| 4             | 6             | 0           | -0.844388               | 0.719860  | -1.779817 |
| 5             | 6             | 0           | 0.662311                | 0.822537  | -1.806575 |
| 6             | 6             | 0           | 1.442782                | 0.132521  | -0.966394 |
| 7             | 6             | 0           | 1.875998                | -1.307201 | 0.811352  |
| 8             | 6             | 0           | 2.956136                | 0.129642  | -0.817830 |
| 9             | 6             | 0           | -1.377067               | -1.886245 | 0.908119  |
| 10            | 6             | 0           | -2.763919               | -0.659979 | -0.548628 |
| 11            | 1             | 0           | 3.342856                | 1.138076  | -0.651923 |
| 12            | 1             | 0           | 3.435114                | -0.249558 | -1.724485 |
| 13            | 1             | 0           | 1.732260                | -2.018124 | 1.617098  |
| 14            | 1             | 0           | -3.352646               | 0.199953  | -0.201237 |
| 15            | 1             | 0           | -3.256575               | -1.068293 | -1.441666 |

|    |   |   |           |           |           |
|----|---|---|-----------|-----------|-----------|
| 16 | 1 | 0 | -1.293066 | -1.643335 | 1.977593  |
| 17 | 1 | 0 | -1.122211 | -2.947246 | 0.786438  |
| 18 | 1 | 0 | -1.272511 | 1.699940  | -1.520308 |
| 19 | 8 | 0 | 0.476888  | 1.752427  | 2.194842  |
| 20 | 1 | 0 | 0.187509  | 1.457825  | 3.064329  |
| 21 | 1 | 0 | 0.777732  | 0.951202  | 1.741149  |
| 22 | 1 | 0 | 1.096555  | 1.508990  | -2.527905 |
| 23 | 1 | 0 | -1.228732 | 0.485531  | -2.783936 |
| 24 | 8 | 0 | -2.725810 | -1.669648 | 0.472220  |
| 25 | 8 | 0 | -1.473734 | 3.071502  | 0.537063  |
| 26 | 1 | 0 | -0.804651 | 2.668337  | 1.117760  |
| 27 | 1 | 0 | -1.365999 | 4.019892  | 0.649736  |
| 28 | 6 | 0 | 3.240350  | -0.804382 | 0.398208  |
| 29 | 1 | 0 | 3.739343  | -0.270420 | 1.215663  |
| 30 | 1 | 0 | 3.905129  | -1.633387 | 0.130153  |

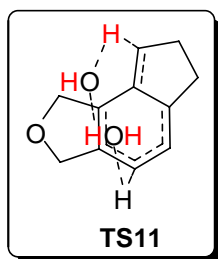

(Nimag=1) -923.7705

| Center Number | Atomic Number | Atomic Type | Coordinates (Angstroms) |           |           |
|---------------|---------------|-------------|-------------------------|-----------|-----------|
|               |               |             | X                       | Y         | Z         |
| 1             | 6             | 0           | 0.638707                | -0.703703 | -0.362631 |
| 2             | 6             | 0           | -0.781889               | -0.717130 | -0.297022 |
| 3             | 6             | 0           | -1.505352               | 0.401197  | -0.629771 |
| 4             | 6             | 0           | -0.883570               | 1.625572  | -0.999713 |
| 5             | 6             | 0           | 0.526931                | 1.561122  | -1.295613 |
| 6             | 6             | 0           | 1.258359                | 0.456535  | -0.962946 |
| 7             | 6             | 0           | 1.602447                | -1.557418 | 0.185651  |
| 8             | 6             | 0           | 2.766646                | 0.266646  | -0.929313 |
| 9             | 6             | 0           | -1.707889               | -1.796874 | 0.180056  |
| 10            | 6             | 0           | -2.966241               | 0.112605  | -0.420344 |
| 11            | 1             | 0           | 3.219482                | 0.988242  | -0.237212 |
| 12            | 1             | 0           | 3.239282                | 0.428369  | -1.901705 |
| 13            | 1             | 0           | 1.381221                | -2.576646 | 0.487630  |
| 14            | 1             | 0           | -3.425011               | 0.784292  | 0.318128  |
| 15            | 1             | 0           | -3.541727               | 0.194807  | -1.351843 |
| 16            | 1             | 0           | -1.530874               | -2.075532 | 1.228596  |
| 17            | 1             | 0           | -1.648377               | -2.711610 | -0.424101 |

|    |   |   |           |           |           |
|----|---|---|-----------|-----------|-----------|
| 18 | 1 | 0 | -0.604104 | 1.938509  | 0.559292  |
| 19 | 1 | 0 | 0.200889  | 2.841019  | 1.727563  |
| 20 | 8 | 0 | -0.299257 | 2.020931  | 1.629892  |
| 21 | 1 | 0 | 1.313445  | -0.592545 | 1.632927  |
| 22 | 1 | 0 | 1.015693  | 2.441750  | -1.705012 |
| 23 | 1 | 0 | -1.480076 | 2.436258  | -1.406635 |
| 24 | 8 | 0 | -3.028831 | -1.238109 | 0.056248  |
| 25 | 8 | 0 | 1.004645  | 0.086542  | 2.382594  |
| 26 | 1 | 0 | 1.660983  | 0.126896  | 3.085041  |
| 27 | 1 | 0 | 0.307220  | 1.175145  | 1.983259  |
| 28 | 6 | 0 | 2.963126  | -1.188649 | -0.404711 |
| 29 | 1 | 0 | 3.790332  | -1.255035 | 0.309369  |
| 30 | 1 | 0 | 3.221530  | -1.858245 | -1.237022 |

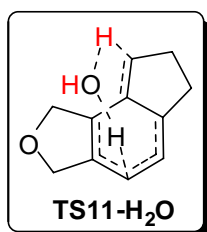

(Nimag=1) -1370.2204

| Center Number | Atomic Number | Atomic Type | Coordinates (Angstroms) |           |           |
|---------------|---------------|-------------|-------------------------|-----------|-----------|
|               |               |             | X                       | Y         | Z         |
| 1             | 6             | 0           | 0.625829                | -0.601290 | -0.344453 |
| 2             | 6             | 0           | -0.795139               | -0.535889 | -0.394998 |
| 3             | 6             | 0           | -1.385229               | 0.692640  | -0.252075 |
| 4             | 6             | 0           | -0.604902               | 1.876080  | -0.083847 |
| 5             | 6             | 0           | 0.757180                | 1.808383  | -0.575212 |
| 6             | 6             | 0           | 1.359626                | 0.595643  | -0.717643 |
| 7             | 6             | 0           | 1.478699                | -1.468981 | 0.342575  |
| 8             | 6             | 0           | 2.833205                | 0.239981  | -0.779586 |
| 9             | 6             | 0           | -1.832088               | -1.610640 | -0.232313 |
| 10            | 6             | 0           | -2.863237               | 0.497030  | -0.054807 |
| 11            | 1             | 0           | 3.471577                | 1.038654  | -0.393239 |
| 12            | 1             | 0           | 3.149413                | 0.051420  | -1.810666 |
| 13            | 1             | 0           | 1.213627                | -2.477424 | 0.642128  |
| 14            | 1             | 0           | -3.182416               | 0.807853  | 0.951594  |
| 15            | 1             | 0           | -3.470339               | 1.043099  | -0.785296 |
| 16            | 1             | 0           | -1.713963               | -2.161452 | 0.715219  |
| 17            | 1             | 0           | -1.846571               | -2.342361 | -1.046733 |
| 18            | 1             | 0           | -0.103622               | 1.270026  | 1.331418  |
| 19            | 1             | 0           | 1.020566                | 0.972755  | 2.623418  |
| 20            | 8             | 0           | 0.380382                | 0.514816  | 2.061372  |

|    |   |   |           |           |           |
|----|---|---|-----------|-----------|-----------|
| 21 | 1 | 0 | 0.864143  | -0.346655 | 1.565458  |
| 22 | 1 | 0 | 1.325084  | 2.728839  | -0.675804 |
| 23 | 1 | 0 | -1.098688 | 2.840532  | -0.028050 |
| 24 | 8 | 0 | -3.085324 | -0.906946 | -0.238462 |
| 25 | 6 | 0 | 2.933179  | -1.077139 | 0.065052  |
| 26 | 1 | 0 | 3.509157  | -0.925765 | 0.985469  |
| 27 | 1 | 0 | 3.458826  | -1.857390 | -0.494359 |

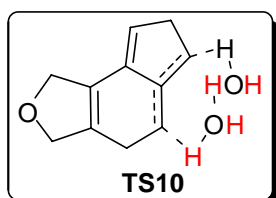

(Nimag=1) -1368.5801

| Center Number | Atomic Number | Atomic Type | Coordinates (Angstroms) |           |           |
|---------------|---------------|-------------|-------------------------|-----------|-----------|
|               |               |             | X                       | Y         | Z         |
| 1             | 6             | 0           | -0.036640               | 1.053490  | 0.113094  |
| 2             | 6             | 0           | -1.370163               | 0.534367  | -0.110432 |
| 3             | 6             | 0           | -1.741143               | -0.655280 | 0.383177  |
| 4             | 6             | 0           | -0.867391               | -1.550076 | 1.205599  |
| 5             | 6             | 0           | 0.618605                | -1.155362 | 1.125888  |
| 6             | 6             | 0           | 0.926172                | 0.202212  | 0.790345  |
| 7             | 6             | 0           | 0.551675                | 2.247146  | -0.169171 |
| 8             | 6             | 0           | 2.213542                | 0.850159  | 0.800514  |
| 9             | 6             | 0           | -2.510183               | 1.161622  | -0.861095 |
| 10            | 6             | 0           | -3.166941               | -0.926084 | 0.004489  |
| 11            | 1             | 0           | 2.836558                | 0.235504  | -0.037390 |
| 12            | 1             | 0           | 2.827495                | 0.710660  | 1.691220  |
| 13            | 1             | 0           | 0.076147                | 3.073398  | -0.684783 |
| 14            | 1             | 0           | -3.257277               | -1.808642 | -0.645198 |
| 15            | 1             | 0           | -3.815770               | -1.085714 | 0.876369  |
| 16            | 1             | 0           | -2.285897               | 1.288606  | -1.929254 |
| 17            | 1             | 0           | -2.800664               | 2.140723  | -0.457997 |
| 18            | 1             | 0           | -0.984242               | -2.589823 | 0.878989  |
| 19            | 8             | 0           | 1.723106                | -2.273947 | -1.111324 |
| 20            | 1             | 0           | 2.015961                | -3.189888 | -1.076060 |
| 21            | 1             | 0           | 1.084809                | -1.703445 | 0.150161  |
| 22            | 1             | 0           | 1.230674                | -1.566283 | 1.931281  |
| 23            | 1             | 0           | -1.217253               | -1.528130 | 2.247851  |
| 24            | 8             | 0           | -3.601079               | 0.244914  | -0.699153 |
| 25            | 8             | 0           | 3.566921                | -0.714735 | -0.966283 |
| 26            | 1             | 0           | 2.677912                | -1.554556 | -1.114733 |

|    |   |   |          |           |           |
|----|---|---|----------|-----------|-----------|
| 27 | 1 | 0 | 3.836177 | -0.356958 | -1.817869 |
| 28 | 6 | 0 | 1.968715 | 2.283277  | 0.311372  |
| 29 | 1 | 0 | 2.660099 | 2.594327  | -0.480977 |
| 30 | 1 | 0 | 2.086200 | 3.017527  | 1.119776  |

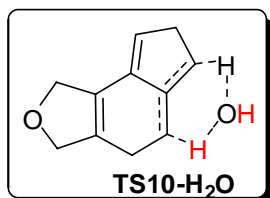

(Nimag=1) -1575.6624

| Center Number | Atomic Number | Atomic Type | Coordinates (Angstroms) |           |           |
|---------------|---------------|-------------|-------------------------|-----------|-----------|
|               |               |             | X                       | Y         | Z         |
| 1             | 6             | 0           | -0.299971               | 0.882709  | -0.221278 |
| 2             | 6             | 0           | 1.095714                | 0.514859  | -0.059943 |
| 3             | 6             | 0           | 1.463140                | -0.773037 | -0.188095 |
| 4             | 6             | 0           | 0.536685                | -1.908911 | -0.534226 |
| 5             | 6             | 0           | -0.948087               | -1.511048 | -0.588366 |
| 6             | 6             | 0           | -1.236500               | -0.116198 | -0.603171 |
| 7             | 6             | 0           | -1.035386               | 2.015244  | 0.030492  |
| 8             | 6             | 0           | -2.554137               | 0.449923  | -0.421592 |
| 9             | 6             | 0           | 2.264392                | 1.426011  | 0.228039  |
| 10            | 6             | 0           | 2.953698                | -0.936382 | -0.017598 |
| 11            | 1             | 0           | -2.861579               | -0.246244 | 0.542388  |
| 12            | 1             | 0           | -3.351580               | 0.330703  | -1.150899 |
| 13            | 1             | 0           | -0.728138               | 3.002188  | 0.345601  |
| 14            | 1             | 0           | 3.211555                | -1.773996 | 0.639321  |
| 15            | 1             | 0           | 3.424572                | -1.150923 | -0.987313 |
| 16            | 1             | 0           | 2.070272                | 2.120669  | 1.052358  |
| 17            | 1             | 0           | 2.497169                | 2.041780  | -0.650806 |
| 18            | 1             | 0           | 0.678490                | -2.726497 | 0.184765  |
| 19            | 8             | 0           | -2.866751               | -1.582286 | 1.277556  |
| 20            | 1             | 0           | -2.620331               | -1.445840 | 2.199088  |
| 21            | 1             | 0           | -1.648525               | -1.702154 | 0.446919  |
| 22            | 1             | 0           | -1.550384               | -2.121380 | -1.265154 |
| 23            | 1             | 0           | 0.852915                | -2.328619 | -1.500486 |
| 24            | 8             | 0           | -2.351891               | 1.839301  | -0.122125 |
| 25            | 6             | 0           | 3.408319                | 0.430340  | 0.558435  |
| 26            | 1             | 0           | 3.515418                | 0.348768  | 1.642935  |
| 27            | 1             | 0           | 4.372092                | 0.754366  | 0.161644  |



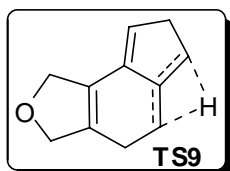

(Nimag=1) -1235.5661

| Center Number | Atomic Number | Atomic Type | Coordinates (Angstroms) |           |           |
|---------------|---------------|-------------|-------------------------|-----------|-----------|
|               |               |             | X                       | Y         | Z         |
| 1             | 6             | 0           | 0.758225                | -0.536874 | -0.019454 |
| 2             | 6             | 0           | -0.683421               | -0.486776 | -0.014708 |
| 3             | 6             | 0           | -1.355830               | 0.674507  | 0.000983  |
| 4             | 6             | 0           | -0.730777               | 2.034296  | 0.004832  |
| 5             | 6             | 0           | 0.772507                | 2.004142  | -0.095131 |
| 6             | 6             | 0           | 1.502799                | 0.773297  | -0.025226 |
| 7             | 6             | 0           | 1.633253                | -1.557783 | -0.010032 |
| 8             | 6             | 0           | 2.898212                | 0.434548  | -0.029205 |
| 9             | 6             | 0           | -1.650249               | -1.638134 | -0.018002 |
| 10            | 6             | 0           | -2.830648               | 0.398343  | 0.013144  |
| 11            | 1             | 0           | 3.707346                | 1.149729  | -0.021430 |
| 12            | 1             | 0           | 1.373934                | -2.609378 | -0.007661 |
| 13            | 1             | 0           | -3.330570               | 0.810118  | 0.901408  |
| 14            | 1             | 0           | -3.339877               | 0.806373  | -0.872171 |
| 15            | 1             | 0           | -1.530895               | -2.292908 | 0.855130  |
| 16            | 1             | 0           | -1.561308               | -2.258352 | -0.919994 |
| 17            | 1             | 0           | -1.076406               | 2.584393  | 0.896877  |
| 18            | 1             | 0           | 1.727101                | 1.138641  | 1.072609  |
| 19            | 1             | 0           | 1.311794                | 2.942638  | -0.128955 |
| 20            | 1             | 0           | -1.137784               | 2.614026  | -0.840564 |
| 21            | 8             | 0           | -2.949823               | -1.030043 | 0.019225  |
| 22            | 6             | 0           | 3.057824                | -1.061192 | 0.007282  |
| 23            | 1             | 0           | 3.604939                | -1.435262 | 0.887473  |
| 24            | 1             | 0           | 3.618934                | -1.439921 | -0.863421 |

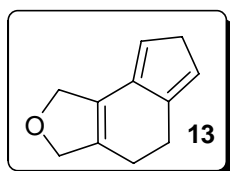

(Nimag=0)

| Center Number | Atomic Number | Atomic Type | Coordinates (Angstroms) |           |           |
|---------------|---------------|-------------|-------------------------|-----------|-----------|
|               |               |             | X                       | Y         | Z         |
| 1             | 6             | 0           | -0.768475               | -0.573272 | -0.037614 |

|    |   |   |           |           |           |
|----|---|---|-----------|-----------|-----------|
| 2  | 6 | 0 | 0.677390  | -0.505790 | -0.052110 |
| 3  | 6 | 0 | 1.318947  | 0.664831  | 0.090830  |
| 4  | 6 | 0 | 0.632973  | 1.985867  | 0.286783  |
| 5  | 6 | 0 | -0.784904 | 1.990609  | -0.335022 |
| 6  | 6 | 0 | -1.521367 | 0.700769  | -0.095408 |
| 7  | 6 | 0 | -1.639132 | -1.602342 | 0.083723  |
| 8  | 6 | 0 | -2.836091 | 0.434659  | 0.012129  |
| 9  | 6 | 0 | 1.674093  | -1.626518 | -0.145603 |
| 10 | 6 | 0 | 2.799684  | 0.426474  | 0.107558  |
| 11 | 1 | 0 | -3.645588 | 1.153098  | -0.007791 |
| 12 | 1 | 0 | -1.397326 | -2.653135 | 0.171507  |
| 13 | 1 | 0 | 3.323078  | 0.957638  | -0.700403 |
| 14 | 1 | 0 | 3.262910  | 0.733357  | 1.057403  |
| 15 | 1 | 0 | 1.600602  | -2.183353 | -1.088387 |
| 16 | 1 | 0 | 1.575046  | -2.345262 | 0.679381  |
| 17 | 1 | 0 | 1.227047  | 2.798911  | -0.144035 |
| 18 | 1 | 0 | -0.675296 | 2.121403  | -1.419379 |
| 19 | 1 | 0 | -1.359700 | 2.847014  | 0.026732  |
| 20 | 1 | 0 | 0.569000  | 2.196719  | 1.363335  |
| 21 | 8 | 0 | 2.958271  | -0.986682 | -0.071743 |
| 22 | 6 | 0 | -3.040637 | -1.054624 | 0.129076  |
| 23 | 1 | 0 | -3.556831 | -1.333612 | 1.058273  |
| 24 | 1 | 0 | -3.663995 | -1.443301 | -0.688731 |

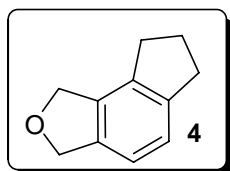

(Nimag=0)

| Center Number | Atomic Number | Atomic Type | Coordinates (Angstroms) |           |           |
|---------------|---------------|-------------|-------------------------|-----------|-----------|
|               |               |             | X                       | Y         | Z         |
| 1             | 6             | 0           | 3.015289                | -0.921288 | 0.264741  |
| 2             | 6             | 0           | 2.857853                | 0.568206  | -0.131074 |
| 3             | 6             | 0           | 1.666902                | -1.587527 | -0.109289 |
| 4             | 1             | 0           | 3.871076                | -1.399839 | -0.215505 |
| 5             | 1             | 0           | 3.163282                | -0.993095 | 1.346327  |
| 6             | 1             | 0           | 3.210959                | 0.739897  | -1.156007 |
| 7             | 1             | 0           | 3.427388                | 1.238935  | 0.517510  |
| 8             | 1             | 0           | 1.406251                | -2.412974 | 0.559090  |
| 9             | 1             | 0           | 1.699627                | -2.001669 | -1.125642 |
| 10            | 6             | 0           | 0.687668                | -0.436037 | -0.047006 |
| 11            | 6             | 0           | 1.362154                | 0.792338  | -0.052631 |

|    |   |   |           |           |           |
|----|---|---|-----------|-----------|-----------|
| 12 | 6 | 0 | -0.700765 | -0.443744 | -0.012954 |
| 13 | 6 | 0 | -1.683312 | -1.582815 | 0.010450  |
| 14 | 1 | 0 | -1.560711 | -2.280393 | -0.825165 |
| 15 | 6 | 0 | -2.876938 | 0.452672  | 0.092894  |
| 16 | 1 | 0 | -3.458654 | 0.947823  | -0.691538 |
| 17 | 1 | 0 | -3.311651 | 0.727182  | 1.064725  |
| 18 | 6 | 0 | -1.403880 | 0.759457  | 0.029064  |
| 19 | 6 | 0 | -0.738999 | 1.981993  | 0.029206  |
| 20 | 1 | 0 | -1.290736 | 2.915458  | 0.066198  |
| 21 | 8 | 0 | -2.974330 | -0.966824 | -0.100774 |
| 22 | 6 | 0 | 0.658961  | 1.995338  | -0.016345 |
| 23 | 1 | 0 | 1.189667  | 2.941808  | -0.020970 |
| 24 | 1 | 0 | -1.621458 | -2.160105 | 0.944830  |

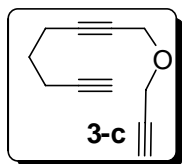

(Nimag=0)

| Center Number | Atomic Number | Atomic Type | Coordinates (Angstroms) |           |           |
|---------------|---------------|-------------|-------------------------|-----------|-----------|
|               |               |             | X                       | Y         | Z         |
| 1             | 6             | 0           | -3.170553               | 1.448994  | -0.159715 |
| 2             | 6             | 0           | -2.543479               | 2.473975  | -0.112839 |
| 3             | 1             | 0           | -1.975210               | 3.370534  | -0.074125 |
| 4             | 6             | 0           | -3.986531               | 0.237716  | -0.203078 |
| 5             | 1             | 0           | -4.209493               | -0.007149 | -1.248864 |
| 6             | 1             | 0           | -4.950895               | 0.466584  | 0.264554  |
| 7             | 6             | 0           | -2.250437               | -1.712746 | -0.261903 |
| 8             | 1             | 0           | -2.110932               | -2.706643 | 0.178951  |
| 9             | 1             | 0           | -2.557728               | -1.886978 | -1.300733 |
| 10            | 6             | 0           | -0.959531               | -1.031020 | -0.248131 |
| 11            | 6             | 0           | 0.123271                | -0.506947 | -0.215382 |
| 12            | 6             | 0           | 1.403832                | 0.180961  | -0.206981 |
| 13            | 1             | 0           | 1.243469                | 1.262631  | -0.076929 |
| 14            | 1             | 0           | 1.917378                | 0.036357  | -1.166720 |
| 15            | 6             | 0           | 3.457646                | 0.363372  | 0.982238  |
| 16            | 1             | 0           | 3.906989                | -0.010607 | 1.904859  |
| 17            | 1             | 0           | 3.294484                | 1.444799  | 1.105257  |
| 18            | 6             | 0           | 4.376733                | 0.137681  | -0.139080 |
| 19            | 6             | 0           | 5.136963                | -0.047728 | -1.052004 |
| 20            | 1             | 0           | 5.807286                | -0.215887 | -1.859485 |
| 21            | 6             | 0           | -3.393519               | -1.004878 | 0.495736  |

|    |   |   |           |           |          |
|----|---|---|-----------|-----------|----------|
| 22 | 1 | 0 | -4.206330 | -1.729360 | 0.608682 |
| 23 | 1 | 0 | -3.059534 | -0.738648 | 1.501669 |
| 24 | 8 | 0 | 2.216767  | -0.315240 | 0.861214 |

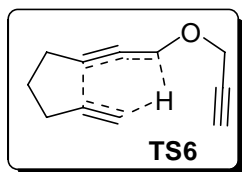

(Nimag=1) -972.9833

| Center Number | Atomic Number | Atomic Type | Coordinates (Angstroms) |           |           |
|---------------|---------------|-------------|-------------------------|-----------|-----------|
|               |               |             | X                       | Y         | Z         |
| 1             | 6             | 0           | -1.741240               | 1.138398  | -0.231527 |
| 2             | 6             | 0           | -0.682453               | 1.795632  | -0.290135 |
| 3             | 1             | 0           | -0.220116               | 2.761391  | -0.338208 |
| 4             | 6             | 0           | -3.223547               | 1.030461  | -0.208208 |
| 5             | 6             | 0           | -3.681442               | -0.294378 | 0.418274  |
| 6             | 1             | 0           | -3.584053               | 1.090678  | -1.242723 |
| 7             | 1             | 0           | -3.643359               | 1.888562  | 0.325150  |
| 8             | 6             | 0           | -2.815473               | -1.414923 | -0.182421 |
| 9             | 1             | 0           | -3.526974               | -0.259282 | 1.500735  |
| 10            | 1             | 0           | -4.744838               | -0.471671 | 0.238704  |
| 11            | 1             | 0           | -2.915513               | -2.348459 | 0.377361  |
| 12            | 1             | 0           | -3.129460               | -1.619261 | -1.213380 |
| 13            | 6             | 0           | -1.414390               | -0.961389 | -0.176644 |
| 14            | 6             | 0           | -0.180054               | -1.100476 | -0.143413 |
| 15            | 6             | 0           | 1.008962                | -0.364657 | -0.202846 |
| 16            | 1             | 0           | 0.430837                | 0.779504  | -0.284959 |
| 17            | 1             | 0           | 1.595660                | -0.460694 | -1.122860 |
| 18            | 6             | 0           | 2.948699                | 0.458296  | 0.891849  |
| 19            | 1             | 0           | 3.388975                | 0.422846  | 1.890429  |
| 20            | 1             | 0           | 2.637698                | 1.494307  | 0.700712  |
| 21            | 6             | 0           | 3.949093                | 0.057319  | -0.102305 |
| 22            | 6             | 0           | 4.779682                | -0.265657 | -0.909293 |
| 23            | 1             | 0           | 5.511954                | -0.556670 | -1.622568 |
| 24            | 8             | 0           | 1.814021                | -0.399126 | 0.951452  |

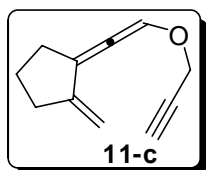

(Nimag=0)

| Center Number | Atomic Number | Atomic Type | Coordinates (Angstroms) |           |           |
|---------------|---------------|-------------|-------------------------|-----------|-----------|
|               |               |             | X                       | Y         | Z         |
| 1             | 6             | 0           | -2.346296               | 0.830685  | -0.237143 |
| 2             | 6             | 0           | -3.717012               | 0.177159  | -0.179442 |
| 3             | 6             | 0           | -3.457335               | -1.189022 | 0.484302  |
| 4             | 1             | 0           | -4.092587               | 0.027980  | -1.199957 |
| 5             | 1             | 0           | -4.450296               | 0.788477  | 0.350372  |
| 6             | 6             | 0           | -2.062642               | -1.588084 | -0.033642 |
| 7             | 1             | 0           | -3.427191               | -1.071781 | 1.572122  |
| 8             | 1             | 0           | -4.224368               | -1.930406 | 0.250550  |
| 9             | 1             | 0           | -1.536097               | -2.292223 | 0.611547  |
| 10            | 1             | 0           | -2.145175               | -2.048375 | -1.025911 |
| 11            | 6             | 0           | -1.327045               | -0.255005 | -0.162451 |
| 12            | 6             | 0           | -0.025111               | -0.108824 | -0.181096 |
| 13            | 6             | 0           | 1.274560                | -0.000709 | -0.235902 |
| 14            | 1             | 0           | 1.820928                | -0.048225 | -1.176071 |
| 15            | 6             | 0           | 3.340250                | 0.712216  | 0.686505  |
| 16            | 1             | 0           | 3.757834                | 0.847359  | 1.685976  |
| 17            | 1             | 0           | 3.230701                | 1.704595  | 0.230681  |
| 18            | 6             | 0           | 4.244468                | -0.107559 | -0.122165 |
| 19            | 6             | 0           | 4.999277                | -0.773132 | -0.779652 |
| 20            | 1             | 0           | 5.662825                | -1.367232 | -1.359756 |
| 21            | 6             | 0           | -2.099897               | 2.140873  | -0.313059 |
| 22            | 1             | 0           | -2.904975               | 2.866377  | -0.344471 |
| 23            | 1             | 0           | -1.084904               | 2.521426  | -0.342903 |
| 24            | 8             | 0           | 2.056751                | 0.121304  | 0.898787  |

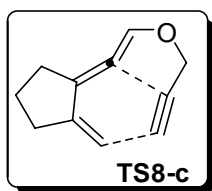

(Nimag=1) -468.8093

| Center Number | Atomic Number | Atomic Type | Coordinates (Angstroms) |           |           |
|---------------|---------------|-------------|-------------------------|-----------|-----------|
|               |               |             | X                       | Y         | Z         |
| 1             | 6             | 0           | 2.727619                | -0.849344 | 0.885216  |
| 2             | 6             | 0           | 2.837809                | 0.437203  | 0.037855  |
| 3             | 6             | 0           | 1.594926                | -1.658545 | 0.216179  |
| 4             | 1             | 0           | 3.668050                | -1.402069 | 0.945380  |
| 5             | 1             | 0           | 2.430864                | -0.589497 | 1.905960  |
| 6             | 1             | 0           | 3.555026                | 0.299858  | -0.781212 |
| 7             | 1             | 0           | 3.176383                | 1.302915  | 0.613416  |

|    |   |   |           |           |           |
|----|---|---|-----------|-----------|-----------|
| 8  | 1 | 0 | 1.055517  | -2.306870 | 0.908906  |
| 9  | 1 | 0 | 1.992628  | -2.298080 | -0.582708 |
| 10 | 6 | 0 | 0.703991  | -0.584544 | -0.398057 |
| 11 | 6 | 0 | 1.443708  | 0.626432  | -0.536422 |
| 12 | 6 | 0 | 0.897106  | 1.803488  | -0.962901 |
| 13 | 1 | 0 | 0.010366  | 1.814434  | -1.579134 |
| 14 | 1 | 0 | 1.468989  | 2.725385  | -0.920809 |
| 15 | 6 | 0 | -0.644012 | -0.635161 | -0.499157 |
| 16 | 6 | 0 | -1.793375 | -1.173540 | -0.859765 |
| 17 | 1 | 0 | -1.950198 | -1.835117 | -1.702893 |
| 18 | 6 | 0 | -2.710415 | 0.052081  | 0.861035  |
| 19 | 1 | 0 | -3.633379 | 0.610572  | 1.018066  |
| 20 | 1 | 0 | -2.484317 | -0.540468 | 1.755408  |
| 21 | 6 | 0 | -1.565117 | 0.941879  | 0.563075  |
| 22 | 6 | 0 | -0.970270 | 2.021562  | 0.606713  |
| 23 | 1 | 0 | -0.713005 | 3.032394  | 0.817626  |
| 24 | 8 | 0 | -2.963594 | -0.837816 | -0.235079 |

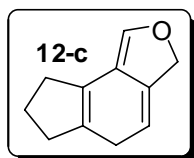

(Nimag=0)

| Center<br>Number | Atomic<br>Number | Atomic<br>Type | Coordinates (Angstroms) |           |           |
|------------------|------------------|----------------|-------------------------|-----------|-----------|
|                  |                  |                | X                       | Y         | Z         |
| 1                | 6                | 0              | -3.042468               | -0.945122 | -0.186007 |
| 2                | 6                | 0              | -2.821775               | 0.565545  | 0.089446  |
| 3                | 6                | 0              | -1.676651               | -1.625286 | 0.096186  |
| 4                | 1                | 0              | -3.853215               | -1.367899 | 0.410721  |
| 5                | 1                | 0              | -3.306609               | -1.085883 | -1.237412 |
| 6                | 1                | 0              | -3.189541               | 0.858622  | 1.083396  |
| 7                | 1                | 0              | -3.348571               | 1.201969  | -0.630729 |
| 8                | 1                | 0              | -1.452399               | -2.419791 | -0.623009 |
| 9                | 1                | 0              | -1.647643               | -2.086832 | 1.092005  |
| 10               | 6                | 0              | -0.700405               | -0.474860 | 0.021508  |
| 11               | 6                | 0              | -1.322586               | 0.719734  | 0.017771  |
| 12               | 6                | 0              | 0.742010                | -0.538568 | 0.008011  |
| 13               | 6                | 0              | 1.642948                | -1.540948 | 0.015551  |
| 14               | 1                | 0              | 1.509722                | -2.612385 | 0.034593  |
| 15               | 6                | 0              | 2.945247                | 0.329031  | -0.030695 |
| 16               | 1                | 0              | 3.499975                | 0.678232  | 0.843798  |
| 17               | 1                | 0              | 3.471197                | 0.644092  | -0.935601 |

|    |   |   |           |           |           |
|----|---|---|-----------|-----------|-----------|
| 18 | 6 | 0 | 1.485462  | 0.722586  | -0.015584 |
| 19 | 6 | 0 | 0.891119  | 1.921260  | -0.017886 |
| 20 | 1 | 0 | 1.471556  | 2.839169  | -0.033849 |
| 21 | 8 | 0 | 2.947720  | -1.126822 | -0.003065 |
| 22 | 6 | 0 | -0.617201 | 2.047306  | 0.002998  |
| 23 | 1 | 0 | -0.957984 | 2.638293  | -0.862759 |
| 24 | 1 | 0 | -0.932454 | 2.642914  | 0.875575  |

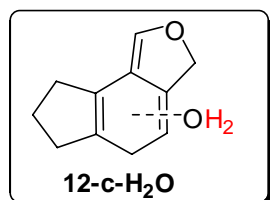

(Nimag=0)

| Center Number | Atomic Number | Atomic Type | Coordinates (Angstroms) |           |           |
|---------------|---------------|-------------|-------------------------|-----------|-----------|
|               |               |             | X                       | Y         | Z         |
| 1             | 6             | 0           | -2.943680               | 0.689190  | -0.262706 |
| 2             | 6             | 0           | -2.056236               | -1.483032 | 0.516150  |
| 3             | 1             | 0           | -3.277595               | 1.632967  | 0.182899  |
| 4             | 1             | 0           | -3.429814               | 0.626929  | -1.246898 |
| 5             | 1             | 0           | -2.231489               | -2.296058 | -0.200553 |
| 6             | 1             | 0           | -1.809536               | -1.957243 | 1.471688  |
| 7             | 6             | 0           | -0.962458               | -0.569876 | 0.014332  |
| 8             | 6             | 0           | -1.444282               | 0.613857  | -0.411902 |
| 9             | 6             | 0           | -0.608630               | 1.703281  | -1.025921 |
| 10            | 1             | 0           | -0.760855               | 2.646038  | -0.477406 |
| 11            | 1             | 0           | -0.976304               | 1.921446  | -2.042098 |
| 12            | 6             | 0           | 0.449214                | -0.857133 | -0.091170 |
| 13            | 6             | 0           | 1.225697                | -1.915518 | 0.219454  |
| 14            | 1             | 0           | 0.973190                | -2.874350 | 0.647598  |
| 15            | 6             | 0           | 2.713980                | -0.412651 | -0.625956 |
| 16            | 1             | 0           | 3.406775                | 0.139250  | 0.013496  |
| 17            | 1             | 0           | 3.154330                | -0.527657 | -1.619207 |
| 18            | 6             | 0           | 1.321023                | 0.175517  | -0.652988 |
| 19            | 6             | 0           | 0.866890                | 1.363067  | -1.080316 |
| 20            | 1             | 0           | 1.539189                | 2.104050  | -1.503117 |
| 21            | 8             | 0           | 2.551520                | -1.744418 | -0.058214 |
| 22            | 8             | 0           | 1.967296                | 2.204470  | 1.999930  |
| 23            | 1             | 0           | 1.601063                | 1.648622  | 2.694527  |
| 24            | 1             | 0           | 1.578662                | 1.863115  | 1.182248  |
| 25            | 6             | 0           | -3.280145               | -0.536083 | 0.627619  |
| 26            | 1             | 0           | -4.214127               | -1.021870 | 0.338818  |

27 1 0 -3.392263 -0.209367 1.664700

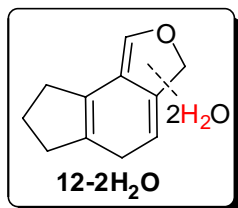

(Nimag=0)

| Center Number | Atomic Number | Atomic Type | Coordinates (Angstroms) |           |           |
|---------------|---------------|-------------|-------------------------|-----------|-----------|
|               |               |             | X                       | Y         | Z         |
| 1             | 6             | 0           | -1.040168               | -0.673803 | -0.144526 |
| 2             | 6             | 0           | 0.374843                | -0.967154 | -0.088053 |
| 3             | 6             | 0           | 1.141763                | -0.394645 | 0.860073  |
| 4             | 6             | 0           | 0.636546                | 0.561028  | 1.902189  |
| 5             | 6             | 0           | -0.857320               | 0.787983  | 1.831510  |
| 6             | 6             | 0           | -1.602561               | 0.212529  | 0.881471  |
| 7             | 6             | 0           | -2.054338               | -1.049872 | -0.953562 |
| 8             | 6             | 0           | -3.083391               | 0.287314  | 0.583127  |
| 9             | 6             | 0           | 1.182136                | -1.821098 | -1.037516 |
| 10            | 6             | 0           | 2.594366                | -0.759937 | 0.694954  |
| 11            | 1             | 0           | -3.433955               | 1.296366  | 0.353011  |
| 12            | 1             | 0           | -3.707603               | -0.135327 | 1.374756  |
| 13            | 1             | 0           | -2.066771               | -1.699914 | -1.816017 |
| 14            | 1             | 0           | 3.145717                | 0.111819  | 0.320382  |
| 15            | 1             | 0           | 3.067203                | -1.050623 | 1.639881  |
| 16            | 1             | 0           | 1.264243                | -1.335281 | -2.019467 |
| 17            | 1             | 0           | 0.730658                | -2.803419 | -1.212853 |
| 18            | 1             | 0           | 1.170168                | 1.517245  | 1.789073  |
| 19            | 8             | 0           | -0.094502               | 2.017539  | -1.931079 |
| 20            | 1             | 0           | -0.102787               | 1.809795  | -2.870613 |
| 21            | 1             | 0           | -0.493711               | 1.249896  | -1.495819 |
| 22            | 1             | 0           | -1.301946               | 1.444745  | 2.573668  |
| 23            | 1             | 0           | 0.915230                | 0.200463  | 2.904860  |
| 24            | 8             | 0           | 2.327135                | 2.588990  | -0.501953 |
| 25            | 1             | 0           | 1.519243                | 2.446251  | -1.025395 |
| 26            | 1             | 0           | 2.478968                | 3.537727  | -0.525409 |
| 27            | 6             | 0           | 2.560959                | -1.923094 | -0.331033 |
| 28            | 1             | 0           | 3.393714                | -1.883610 | -1.035829 |
| 29            | 1             | 0           | 2.627529                | -2.878496 | 0.196213  |
| 30            | 8             | 0           | -3.272998               | -0.529422 | -0.609749 |



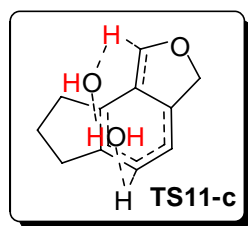

(Nimag=1) -1142.5950

| Center<br>Number | Atomic<br>Number | Atomic<br>Type | Coordinates (Angstroms) |           |           |
|------------------|------------------|----------------|-------------------------|-----------|-----------|
|                  |                  |                | X                       | Y         | Z         |
| 1                | 6                | 0              | 0.602749                | -0.757037 | -0.345350 |
| 2                | 6                | 0              | -0.815176               | -0.707463 | -0.231625 |
| 3                | 6                | 0              | -1.481203               | 0.445083  | -0.588556 |
| 4                | 6                | 0              | -0.793288               | 1.615947  | -1.028978 |
| 5                | 6                | 0              | 0.594417                | 1.456586  | -1.392224 |
| 6                | 6                | 0              | 1.262816                | 0.320804  | -1.044731 |
| 7                | 6                | 0              | 1.578567                | -1.550170 | 0.246477  |
| 8                | 6                | 0              | 2.727001                | -0.054943 | -1.120748 |
| 9                | 6                | 0              | -1.750732               | -1.737823 | 0.351422  |
| 10               | 6                | 0              | -2.959911               | 0.311213  | -0.296385 |
| 11               | 1                | 0              | 3.402076                | 0.745802  | -0.796905 |
| 12               | 1                | 0              | 3.035456                | -0.370107 | -2.127984 |
| 13               | 1                | 0              | 1.507752                | -2.585765 | 0.552519  |
| 14               | 1                | 0              | -3.219519               | 0.884744  | 0.603536  |
| 15               | 1                | 0              | -3.586860               | 0.697463  | -1.105684 |
| 16               | 1                | 0              | -1.649741               | -1.782062 | 1.445887  |
| 17               | 1                | 0              | -1.558249               | -2.749675 | -0.019581 |
| 18               | 1                | 0              | -0.445850               | 1.998168  | 0.501049  |
| 19               | 1                | 0              | 0.379137                | 2.930240  | 1.631957  |
| 20               | 8                | 0              | -0.116744               | 2.105556  | 1.559168  |
| 21               | 1                | 0              | 1.308985                | -0.566051 | 1.625542  |
| 22               | 1                | 0              | 1.109357                | 2.278942  | -1.882177 |
| 23               | 1                | 0              | -1.359589               | 2.438673  | -1.455078 |
| 24               | 8                | 0              | 1.130751                | 0.178595  | 2.371737  |
| 25               | 1                | 0              | 1.943975                | 0.311812  | 2.871088  |
| 26               | 1                | 0              | 0.493392                | 1.237963  | 1.943699  |
| 27               | 6                | 0              | -3.146761               | -1.210185 | -0.067785 |
| 28               | 1                | 0              | -3.441285               | -1.682645 | -1.009043 |
| 29               | 1                | 0              | -3.923567               | -1.433499 | 0.666774  |
| 30               | 8                | 0              | 2.872700                | -1.177409 | -0.222742 |

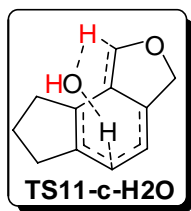

(Nimag=1) -1244.9545

| Center Number | Atomic Number | Atomic Type | Coordinates (Angstroms) |           |           |
|---------------|---------------|-------------|-------------------------|-----------|-----------|
|               |               |             | X                       | Y         | Z         |
| 1             | 6             | 0           | 0.625002                | -0.635822 | -0.332211 |
| 2             | 6             | 0           | -0.798053               | -0.539578 | -0.329461 |
| 3             | 6             | 0           | -1.345382               | 0.717269  | -0.225202 |
| 4             | 6             | 0           | -0.518612               | 1.883188  | -0.128258 |
| 5             | 6             | 0           | 0.831522                | 1.763573  | -0.629542 |
| 6             | 6             | 0           | 1.385998                | 0.526395  | -0.757605 |
| 7             | 6             | 0           | 1.514555                | -1.460092 | 0.345368  |
| 8             | 6             | 0           | 2.824818                | 0.073303  | -0.795037 |
| 9             | 6             | 0           | -1.832627               | -1.618158 | -0.122035 |
| 10            | 6             | 0           | -2.837073               | 0.626404  | 0.008919  |
| 11            | 1             | 0           | 3.538037                | 0.818450  | -0.433941 |
| 12            | 1             | 0           | 3.148913                | -0.269645 | -1.787500 |
| 13            | 1             | 0           | 1.408846                | -2.489611 | 0.659262  |
| 14            | 1             | 0           | -3.065168               | 0.855504  | 1.058651  |
| 15            | 1             | 0           | -3.406555               | 1.336492  | -0.598030 |
| 16            | 1             | 0           | -1.766654               | -2.029844 | 0.897035  |
| 17            | 1             | 0           | -1.722481               | -2.463173 | -0.808053 |
| 18            | 1             | 0           | 0.014524                | 1.304693  | 1.332699  |
| 19            | 1             | 0           | 1.181441                | 1.010120  | 2.560941  |
| 20            | 8             | 0           | 0.480878                | 0.568600  | 2.059495  |
| 21            | 1             | 0           | 0.893436                | -0.328600 | 1.563352  |
| 22            | 1             | 0           | 1.423073                | 2.662715  | -0.776568 |
| 23            | 1             | 0           | -0.984864               | 2.862557  | -0.104618 |
| 24            | 8             | 0           | 2.851027                | -1.070196 | 0.104189  |
| 25            | 6             | 0           | -3.162803               | -0.850296 | -0.329210 |
| 26            | 1             | 0           | -3.459886               | -0.923652 | -1.379025 |
| 27            | 1             | 0           | -3.981972               | -1.250360 | 0.271963  |

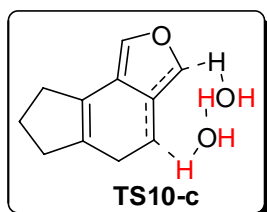

(Nimag=1) -1160.1118

| Center<br>Number | Atomic<br>Number | Atomic<br>Type | Coordinates (Angstroms) |           |           |
|------------------|------------------|----------------|-------------------------|-----------|-----------|
|                  |                  |                | X                       | Y         | Z         |
| 1                | 6                | 0              | -0.074368               | 1.028303  | 0.146918  |
| 2                | 6                | 0              | -1.406396               | 0.504379  | -0.096349 |
| 3                | 6                | 0              | -1.728414               | -0.720532 | 0.352817  |
| 4                | 6                | 0              | -0.803955               | -1.608991 | 1.140139  |
| 5                | 6                | 0              | 0.675742                | -1.172985 | 1.069816  |
| 6                | 6                | 0              | 0.896461                | 0.220062  | 0.781756  |
| 7                | 6                | 0              | 0.550945                | 2.224885  | -0.130350 |
| 8                | 6                | 0              | 2.147240                | 0.962636  | 0.784254  |
| 9                | 6                | 0              | -2.526358               | 1.153314  | -0.872613 |
| 10               | 6                | 0              | -3.134013               | -1.097717 | -0.041724 |
| 11               | 1                | 0              | 2.884280                | 0.424230  | 0.031608  |
| 12               | 1                | 0              | 2.687375                | 1.079798  | 1.723594  |
| 13               | 1                | 0              | 0.175849                | 3.114139  | -0.618077 |
| 14               | 1                | 0              | -3.107226               | -1.872528 | -0.819765 |
| 15               | 1                | 0              | -3.706651               | -1.519413 | 0.791637  |
| 16               | 1                | 0              | -2.289369               | 1.173916  | -1.944307 |
| 17               | 1                | 0              | -2.710484               | 2.190623  | -0.572299 |
| 18               | 1                | 0              | -0.889383               | -2.639679 | 0.777825  |
| 19               | 8                | 0              | 1.931197                | -2.136984 | -1.178110 |
| 20               | 1                | 0              | 2.216043                | -3.054944 | -1.219676 |
| 21               | 1                | 0              | 1.181316                | -1.676881 | 0.110985  |
| 22               | 1                | 0              | 1.283352                | -1.556439 | 1.892722  |
| 23               | 1                | 0              | -1.151792               | -1.636560 | 2.183542  |
| 24               | 8                | 0              | 3.744833                | -0.574319 | -0.813426 |
| 25               | 1                | 0              | 2.920857                | -1.381861 | -1.057889 |
| 26               | 1                | 0              | 4.126233                | -0.246971 | -1.633481 |
| 27               | 8                | 0              | 1.818741                | 2.270033  | 0.258401  |
| 28               | 6                | 0              | -3.738144               | 0.232719  | -0.563342 |
| 29               | 1                | 0              | -4.383849               | 0.088717  | -1.431248 |
| 30               | 1                | 0              | -4.347155               | 0.687568  | 0.221976  |

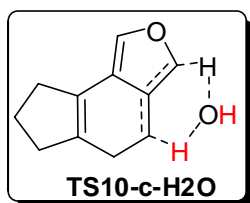

(Nimag=1) -1855.2363

| Center<br>Number | Atomic<br>Number | Atomic<br>Type | Coordinates (Angstroms) |   |   |
|------------------|------------------|----------------|-------------------------|---|---|
|                  |                  |                | X                       | Y | Z |

---

|    |   |   |           |           |           |
|----|---|---|-----------|-----------|-----------|
| 1  | 6 | 0 | -0.306596 | 0.887695  | -0.172090 |
| 2  | 6 | 0 | 1.087620  | 0.526479  | -0.018215 |
| 3  | 6 | 0 | 1.498596  | -0.740618 | -0.179287 |
| 4  | 6 | 0 | 0.623164  | -1.896297 | -0.557779 |
| 5  | 6 | 0 | -0.865662 | -1.533550 | -0.604393 |
| 6  | 6 | 0 | -1.232217 | -0.160441 | -0.586902 |
| 7  | 6 | 0 | -1.002554 | 2.033315  | 0.044577  |
| 8  | 6 | 0 | -2.571701 | 0.322229  | -0.461503 |
| 9  | 6 | 0 | 2.249545  | 1.403261  | 0.353405  |
| 10 | 6 | 0 | 2.977198  | -0.816746 | 0.066365  |
| 11 | 1 | 0 | -2.798460 | -0.447617 | 0.542364  |
| 12 | 1 | 0 | -3.340076 | -0.038113 | -1.144205 |
| 13 | 1 | 0 | -0.580269 | 2.974076  | 0.377395  |
| 14 | 1 | 0 | 3.224367  | -1.471470 | 0.914437  |
| 15 | 1 | 0 | 3.531402  | -1.184101 | -0.808605 |
| 16 | 1 | 0 | 2.132030  | 1.858586  | 1.346523  |
| 17 | 1 | 0 | 2.418134  | 2.212127  | -0.369660 |
| 18 | 1 | 0 | 0.785522  | -2.727455 | 0.141293  |
| 19 | 8 | 0 | -2.739000 | -1.669413 | 1.292548  |
| 20 | 1 | 0 | -2.482364 | -1.461581 | 2.197835  |
| 21 | 1 | 0 | -1.548722 | -1.745789 | 0.456323  |
| 22 | 1 | 0 | -1.463692 | -2.172922 | -1.256822 |
| 23 | 1 | 0 | 0.951948  | -2.281131 | -1.533743 |
| 24 | 8 | 0 | 3.384524  | 0.526316  | 0.357932  |
| 25 | 6 | 0 | -2.473047 | 1.819980  | -0.177040 |
| 26 | 1 | 0 | -2.845080 | 2.429601  | -1.011245 |
| 27 | 1 | 0 | -3.054998 | 2.128725  | 0.701451  |

---

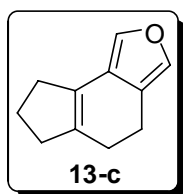

(Nimag=0)

---

| Center Number | Atomic Number | Atomic Type | Coordinates (Angstroms) |           |           |
|---------------|---------------|-------------|-------------------------|-----------|-----------|
|               |               |             | X                       | Y         | Z         |
| 1             | 6             | 0           | 3.014883                | -0.918792 | 0.252703  |
| 2             | 6             | 0           | 2.778296                | 0.550574  | -0.185014 |
| 3             | 6             | 0           | 1.655066                | -1.637408 | 0.049201  |
| 4             | 1             | 0           | 3.829268                | -1.396515 | -0.295675 |
| 5             | 1             | 0           | 3.280437                | -0.940945 | 1.312962  |
| 6             | 1             | 0           | 3.125988                | 0.730371  | -1.212844 |

|    |   |   |           |           |           |
|----|---|---|-----------|-----------|-----------|
| 7  | 1 | 0 | 3.312808  | 1.267461  | 0.448062  |
| 8  | 1 | 0 | 1.442962  | -2.363087 | 0.840867  |
| 9  | 1 | 0 | 1.625879  | -2.190657 | -0.899283 |
| 10 | 6 | 0 | 0.668987  | -0.494008 | 0.018985  |
| 11 | 6 | 0 | 1.278559  | 0.700259  | -0.104055 |
| 12 | 6 | 0 | 0.530916  | 1.995440  | -0.291136 |
| 13 | 1 | 0 | 0.444219  | 2.197372  | -1.369191 |
| 14 | 1 | 0 | 1.101396  | 2.832233  | 0.125075  |
| 15 | 6 | 0 | -0.778989 | -0.569282 | 0.012423  |
| 16 | 6 | 0 | -1.677823 | -1.585079 | -0.119185 |
| 17 | 1 | 0 | -1.588125 | -2.651480 | -0.238658 |
| 18 | 6 | 0 | -2.854397 | 0.268728  | 0.029213  |
| 19 | 1 | 0 | -3.790264 | 0.801447  | 0.059905  |
| 20 | 6 | 0 | -1.555581 | 0.645915  | 0.110224  |
| 21 | 6 | 0 | -0.879331 | 1.965924  | 0.347189  |
| 22 | 1 | 0 | -1.481995 | 2.799268  | -0.023139 |
| 23 | 1 | 0 | -0.770424 | 2.111801  | 1.429482  |
| 24 | 8 | 0 | -2.951957 | -1.091361 | -0.112607 |

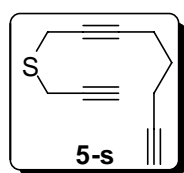

(Nimag=0)

| Center Number | Atomic Number | Atomic Type | Coordinates (Angstroms) |           |           |
|---------------|---------------|-------------|-------------------------|-----------|-----------|
|               |               |             | X                       | Y         | Z         |
| 1             | 6             | 0           | -2.714194               | 1.752789  | -0.327868 |
| 2             | 6             | 0           | -2.051473               | 2.739675  | -0.147955 |
| 3             | 1             | 0           | -1.456720               | 3.604385  | 0.016384  |
| 4             | 6             | 0           | -3.561344               | 0.592627  | -0.547701 |
| 5             | 1             | 0           | -3.436138               | 0.203186  | -1.561320 |
| 6             | 1             | 0           | -4.611441               | 0.874577  | -0.438229 |
| 7             | 6             | 0           | -2.013434               | -1.792471 | -0.219411 |
| 8             | 1             | 0           | -1.964082               | -2.713447 | 0.368358  |
| 9             | 1             | 0           | -2.385450               | -2.064020 | -1.211299 |
| 10            | 6             | 0           | -0.708344               | -1.164481 | -0.305740 |
| 11            | 6             | 0           | 0.373861                | -0.642439 | -0.393679 |
| 12            | 6             | 0           | 1.676781                | 0.010059  | -0.467052 |
| 13            | 6             | 0           | 2.408522                | 0.045365  | 0.888218  |
| 14            | 1             | 0           | 1.541515                | 1.034386  | -0.836400 |
| 15            | 1             | 0           | 2.303273                | -0.502964 | -1.204889 |
| 16            | 6             | 0           | 3.778244                | 0.750163  | 0.813621  |

|    |    |   |           |           |           |
|----|----|---|-----------|-----------|-----------|
| 17 | 1  | 0 | 1.786740  | 0.569275  | 1.619391  |
| 18 | 1  | 0 | 2.542756  | -0.975921 | 1.254191  |
| 19 | 1  | 0 | 4.198096  | 0.821626  | 1.822686  |
| 20 | 1  | 0 | 3.643476  | 1.781123  | 0.464233  |
| 21 | 6  | 0 | 4.744488  | 0.077210  | -0.051694 |
| 22 | 6  | 0 | 5.533633  | -0.488528 | -0.761890 |
| 23 | 1  | 0 | 6.235064  | -0.984284 | -1.387301 |
| 24 | 16 | 0 | -3.324846 | -0.807984 | 0.638818  |

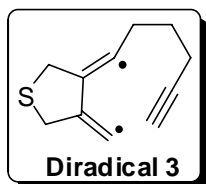

(Nimag=0)

| Center Number | Atomic Number | Atomic Type | Coordinates (Angstroms) |           |           |
|---------------|---------------|-------------|-------------------------|-----------|-----------|
|               |               |             | X                       | Y         | Z         |
| 1             | 6             | 0           | -1.356497               | 1.115540  | 0.267519  |
| 2             | 6             | 0           | -0.864042               | 2.220605  | 0.785519  |
| 3             | 1             | 0           | -1.189612               | 3.232994  | 0.968636  |
| 4             | 6             | 0           | -2.767827               | 1.049837  | -0.322821 |
| 5             | 1             | 0           | -2.750738               | 1.309760  | -1.384996 |
| 6             | 1             | 0           | -3.468785               | 1.705106  | 0.191821  |
| 7             | 6             | 0           | -1.590819               | -1.276745 | -0.411144 |
| 8             | 1             | 0           | -1.463224               | -2.246245 | 0.069901  |
| 9             | 1             | 0           | -1.419471               | -1.391412 | -1.485330 |
| 10            | 6             | 0           | -0.670833               | -0.200858 | 0.179437  |
| 11            | 6             | 0           | 0.569320                | -0.443847 | 0.557223  |
| 12            | 6             | 0           | 1.532892                | -1.547979 | 0.654989  |
| 13            | 1             | 0           | 1.012981                | -2.500719 | 0.457337  |
| 14            | 1             | 0           | 1.901629                | -1.618202 | 1.687456  |
| 15            | 6             | 0           | 2.743167                | -1.454758 | -0.298694 |
| 16            | 1             | 0           | 3.307604                | -2.389156 | -0.216180 |
| 17            | 1             | 0           | 2.392398                | -1.380513 | -1.331752 |
| 18            | 6             | 0           | 3.712657                | -0.291676 | -0.001939 |
| 19            | 1             | 0           | 4.626572                | -0.441601 | -0.587560 |
| 20            | 1             | 0           | 4.016077                | -0.330372 | 1.051465  |
| 21            | 6             | 0           | 3.185560                | 1.037193  | -0.299989 |
| 22            | 6             | 0           | 2.772499                | 2.135995  | -0.561955 |
| 23            | 1             | 0           | 2.384394                | 3.100350  | -0.779848 |
| 24            | 16            | 0           | -3.309143               | -0.694365 | -0.120614 |

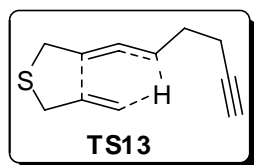

(Nimag=1) -934.9024

| Center Number | Atomic Number | Atomic Type | Coordinates (Angstroms) |           |           |
|---------------|---------------|-------------|-------------------------|-----------|-----------|
|               |               |             | X                       | Y         | Z         |
| 1             | 6             | 0           | -1.303547               | 1.209172  | -0.233679 |
| 2             | 6             | 0           | -0.191535               | 1.772709  | -0.187670 |
| 3             | 1             | 0           | 0.350512                | 2.693523  | -0.103096 |
| 4             | 6             | 0           | -2.777538               | 1.304493  | -0.265812 |
| 5             | 1             | 0           | -3.115294               | 1.428726  | -1.298597 |
| 6             | 1             | 0           | -3.114429               | 2.168749  | 0.310292  |
| 7             | 6             | 0           | -2.563053               | -1.368475 | -0.446825 |
| 8             | 1             | 0           | -2.693185               | -2.334903 | 0.042535  |
| 9             | 1             | 0           | -2.916774               | -1.449837 | -1.478244 |
| 10            | 6             | 0           | -1.164523               | -0.932776 | -0.397310 |
| 11            | 6             | 0           | 0.061951                | -1.124878 | -0.380175 |
| 12            | 6             | 0           | 1.313902                | -0.509389 | -0.306899 |
| 13            | 6             | 0           | 2.170871                | -0.705137 | 0.944177  |
| 14            | 1             | 0           | 0.831846                | 0.674288  | -0.272229 |
| 15            | 1             | 0           | 1.897219                | -0.531857 | -1.231177 |
| 16            | 6             | 0           | 3.347908                | 0.289144  | 1.034823  |
| 17            | 1             | 0           | 1.542835                | -0.587477 | 1.831539  |
| 18            | 1             | 0           | 2.565368                | -1.725365 | 0.960779  |
| 19            | 1             | 0           | 3.866530                | 0.137337  | 1.987438  |
| 20            | 1             | 0           | 2.963221                | 1.315012  | 1.054463  |
| 21            | 6             | 0           | 4.314523                | 0.161795  | -0.053313 |
| 22            | 6             | 0           | 5.106378                | 0.044713  | -0.951320 |
| 23            | 1             | 0           | 5.809342                | -0.054762 | -1.741807 |
| 24            | 16            | 0           | -3.617451               | -0.161353 | 0.462632  |

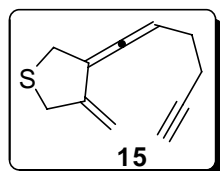

(Nimag=0)

| Center Number | Atomic Number | Atomic Type | Coordinates (Angstroms) |          |           |
|---------------|---------------|-------------|-------------------------|----------|-----------|
|               |               |             | X                       | Y        | Z         |
| 1             | 6             | 0           | -1.722935               | 1.133224 | -0.109083 |

|    |    |   |           |           |           |
|----|----|---|-----------|-----------|-----------|
| 2  | 6  | 0 | -1.115976 | 2.303945  | 0.105498  |
| 3  | 1  | 0 | -1.683062 | 3.205474  | 0.305392  |
| 4  | 6  | 0 | -3.230497 | 0.967346  | -0.110096 |
| 5  | 1  | 0 | -3.645036 | 1.169869  | -1.102332 |
| 6  | 1  | 0 | -3.720557 | 1.619034  | 0.612438  |
| 7  | 6  | 0 | -2.037857 | -1.303160 | -0.565049 |
| 8  | 1  | 0 | -1.678745 | -2.246861 | -0.158076 |
| 9  | 1  | 0 | -2.269369 | -1.440866 | -1.625236 |
| 10 | 6  | 0 | -1.044773 | -0.165079 | -0.365160 |
| 11 | 6  | 0 | 0.252288  | -0.352661 | -0.402383 |
| 12 | 6  | 0 | 1.541836  | -0.548891 | -0.425531 |
| 13 | 6  | 0 | 2.380416  | -0.900148 | 0.783222  |
| 14 | 1  | 0 | -0.035721 | 2.391859  | 0.082745  |
| 15 | 1  | 0 | 2.074712  | -0.458702 | -1.372479 |
| 16 | 6  | 0 | 3.520705  | 0.112466  | 1.049887  |
| 17 | 1  | 0 | 1.744939  | -0.953274 | 1.669922  |
| 18 | 1  | 0 | 2.824045  | -1.891267 | 0.636223  |
| 19 | 1  | 0 | 4.031360  | -0.168893 | 1.977408  |
| 20 | 1  | 0 | 3.091924  | 1.106297  | 1.217592  |
| 21 | 6  | 0 | 4.504316  | 0.186630  | -0.027085 |
| 22 | 16 | 0 | -3.556840 | -0.787887 | 0.335344  |
| 23 | 6  | 0 | 5.310503  | 0.232099  | -0.918717 |
| 24 | 1  | 0 | 6.026796  | 0.278892  | -1.702108 |

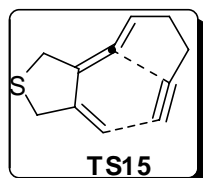

(Nimag=1) -515.1786

| Center Number | Atomic Number | Atomic Type | Coordinates (Angstroms) |           |           |
|---------------|---------------|-------------|-------------------------|-----------|-----------|
|               |               |             | X                       | Y         | Z         |
| 1             | 6             | 0           | 2.529243                | 0.842645  | -0.178858 |
| 2             | 6             | 0           | 1.373865                | -1.564776 | -0.074390 |
| 3             | 1             | 0           | 3.221383                | 0.934331  | -1.020383 |
| 4             | 1             | 0           | 2.716617                | 1.669139  | 0.509309  |
| 5             | 1             | 0           | 0.886411                | -2.200976 | 0.663819  |
| 6             | 1             | 0           | 1.700154                | -2.190430 | -0.910318 |
| 7             | 6             | 0           | 0.467226                | -0.446995 | -0.559283 |
| 8             | 6             | 0           | 1.090912                | 0.821317  | -0.652538 |
| 9             | 6             | 0           | 0.390286                | 1.963172  | -0.953034 |
| 10            | 1             | 0           | -0.504791               | 1.920145  | -1.555709 |
| 11            | 1             | 0           | 0.874344                | 2.932632  | -0.889910 |



|    |    |   |           |           |           |
|----|----|---|-----------|-----------|-----------|
| 12 | 6  | 0 | -0.878211 | -0.600882 | -0.609778 |
| 13 | 6  | 0 | -2.017137 | -1.142102 | -0.984848 |
| 14 | 1  | 0 | -2.087059 | -1.721627 | -1.903573 |
| 15 | 6  | 0 | -3.264567 | -0.892271 | -0.175513 |
| 16 | 6  | 0 | -2.856850 | -0.108453 | 1.085290  |
| 17 | 1  | 0 | -3.763820 | -1.829460 | 0.092614  |
| 18 | 1  | 0 | -3.981738 | -0.316548 | -0.773931 |
| 19 | 1  | 0 | -3.715193 | 0.407434  | 1.525207  |
| 20 | 1  | 0 | -2.470580 | -0.805318 | 1.836581  |
| 21 | 6  | 0 | -1.793404 | 0.862177  | 0.747017  |
| 22 | 6  | 0 | -1.228726 | 1.959706  | 0.712341  |
| 23 | 1  | 0 | -1.038553 | 2.979037  | 0.957812  |
| 24 | 16 | 0 | 2.830437  | -0.746224 | 0.708128  |

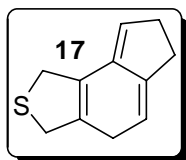

(Nimag=0)

| Center Number | Atomic Number | Atomic Type | Coordinates (Angstroms) |           |           |
|---------------|---------------|-------------|-------------------------|-----------|-----------|
|               |               |             | X                       | Y         | Z         |
| 1             | 6             | 0           | 2.499077                | 0.976793  | 0.000348  |
| 2             | 6             | 0           | 1.416153                | -1.496103 | 0.000510  |
| 3             | 1             | 0           | 2.875464                | 1.501850  | -0.883474 |
| 4             | 1             | 0           | 2.875178                | 1.501176  | 0.884691  |
| 5             | 1             | 0           | 1.287102                | -2.124103 | 0.886235  |
| 6             | 1             | 0           | 1.286674                | -2.124883 | -0.884600 |
| 7             | 6             | 0           | 0.460752                | -0.333962 | 0.000157  |
| 8             | 6             | 0           | 0.998979                | 0.897654  | 0.000027  |
| 9             | 6             | 0           | 0.186072                | 2.164123  | -0.000335 |
| 10            | 1             | 0           | 0.470926                | 2.777241  | -0.870015 |
| 11            | 1             | 0           | 0.471130                | 2.777919  | 0.868798  |
| 12            | 6             | 0           | -0.983735               | -0.504878 | 0.000037  |
| 13            | 6             | 0           | -1.741711               | -1.620539 | -0.000148 |
| 14            | 1             | 0           | -1.363102               | -2.635851 | -0.000223 |
| 15            | 6             | 0           | -3.217449               | -1.304268 | -0.000453 |
| 16            | 6             | 0           | -3.277380               | 0.252864  | 0.000478  |
| 17            | 1             | 0           | -3.719517               | -1.733280 | 0.874638  |
| 18            | 1             | 0           | -3.718822               | -1.732159 | -0.876501 |
| 19            | 1             | 0           | -3.806231               | 0.633749  | -0.877017 |
| 20            | 1             | 0           | -3.805283               | 0.632566  | 0.879062  |
| 21            | 6             | 0           | -1.824653               | 0.699014  | 0.000067  |

|    |    |   |           |           |           |
|----|----|---|-----------|-----------|-----------|
| 22 | 16 | 0 | 3.113724  | -0.765780 | -0.000314 |
| 23 | 6  | 0 | -1.304410 | 1.930767  | -0.000106 |
| 24 | 1  | 0 | -1.943272 | 2.809465  | -0.000062 |

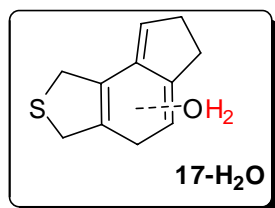

(Nimag=0)

| Center Number | Atomic Number | Atomic Type | Coordinates (Angstroms) |           |           |
|---------------|---------------|-------------|-------------------------|-----------|-----------|
|               |               |             | X                       | Y         | Z         |
| 1             | 6             | 0           | 0.736583                | -0.803312 | -0.131572 |
| 2             | 6             | 0           | -0.679952               | -0.476952 | -0.072089 |
| 3             | 6             | 0           | -1.117340               | 0.729260  | -0.474275 |
| 4             | 6             | 0           | -0.216868               | 1.810083  | -1.009989 |
| 5             | 6             | 0           | 1.242739                | 1.425705  | -1.039355 |
| 6             | 6             | 0           | 1.662985                | 0.216832  | -0.642147 |
| 7             | 6             | 0           | 1.404409                | -1.921658 | 0.218891  |
| 8             | 6             | 0           | 3.063200                | -0.373248 | -0.625684 |
| 9             | 6             | 0           | -1.716624               | -1.448340 | 0.423200  |
| 10            | 6             | 0           | -2.596928               | 0.972123  | -0.384822 |
| 11            | 1             | 0           | 3.751395                | 0.242087  | -0.041442 |
| 12            | 1             | 0           | 3.467895                | -0.428844 | -1.639697 |
| 13            | 1             | 0           | 0.952419                | -2.818903 | 0.624935  |
| 14            | 1             | 0           | -2.828725               | 1.826934  | 0.258073  |
| 15            | 1             | 0           | -3.030797               | 1.168945  | -1.370540 |
| 16            | 1             | 0           | -1.525907               | -1.754855 | 1.455268  |
| 17            | 1             | 0           | -1.751839               | -2.348195 | -0.197215 |
| 18            | 1             | 0           | -0.354336               | 2.728077  | -0.418230 |
| 19            | 1             | 0           | 1.773422                | 1.785012  | 1.315001  |
| 20            | 8             | 0           | 1.927571                | 2.145133  | 2.199414  |
| 21            | 1             | 0           | 1.350133                | 1.634495  | 2.775067  |
| 22            | 1             | 0           | 1.942833                | 2.164764  | -1.418817 |
| 23            | 1             | 0           | -0.547677               | 2.088062  | -2.023017 |
| 24            | 6             | 0           | 2.890287                | -1.792450 | -0.008250 |
| 25            | 1             | 0           | 3.266049                | -2.577928 | -0.673513 |
| 26            | 1             | 0           | 3.445909                | -1.898689 | 0.930806  |
| 27            | 16            | 0           | -3.335393               | -0.562518 | 0.331535  |

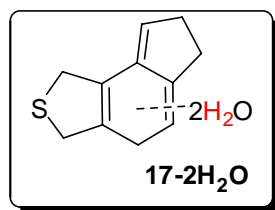

(Nimag=0)

| Center Number | Atomic Number | Atomic Type | Coordinates (Angstroms) |           |           |
|---------------|---------------|-------------|-------------------------|-----------|-----------|
|               |               |             | X                       | Y         | Z         |
| 1             | 6             | 0           | 1.101522                | -0.760346 | -0.038368 |
| 2             | 6             | 0           | -0.349587               | -0.787777 | -0.139732 |
| 3             | 6             | 0           | -0.988554               | 0.099481  | -0.922555 |
| 4             | 6             | 0           | -0.290418               | 1.149864  | -1.739029 |
| 5             | 6             | 0           | 1.212623                | 1.085241  | -1.654605 |
| 6             | 6             | 0           | 1.839281                | 0.206665  | -0.865238 |
| 7             | 6             | 0           | 1.951217                | -1.485743 | 0.723956  |
| 8             | 6             | 0           | 3.324051                | -0.005986 | -0.618543 |
| 9             | 6             | 0           | -1.201991               | -1.764879 | 0.624208  |
| 10            | 6             | 0           | -2.488148               | 0.044892  | -0.912391 |
| 11            | 1             | 0           | 3.815589                | 0.918321  | -0.305483 |
| 12            | 1             | 0           | 3.824175                | -0.337883 | -1.532455 |
| 13            | 1             | 0           | 1.660450                | -2.269390 | 1.414133  |
| 14            | 1             | 0           | -2.901630               | 0.972029  | -0.505659 |
| 15            | 1             | 0           | -2.898719               | -0.106489 | -1.915222 |
| 16            | 1             | 0           | -1.073881               | -1.660731 | 1.706373  |
| 17            | 1             | 0           | -0.968315               | -2.799265 | 0.357305  |
| 18            | 1             | 0           | -0.640810               | 2.135614  | -1.399117 |
| 19            | 8             | 0           | 0.502722                | 1.525196  | 2.416873  |
| 20            | 1             | 0           | 0.147839                | 1.093096  | 3.200447  |
| 21            | 1             | 0           | 0.859881                | 0.810332  | 1.870598  |
| 22            | 1             | 0           | 1.773620                | 1.799814  | -2.250458 |
| 23            | 1             | 0           | -0.614207               | 1.072327  | -2.788229 |
| 24            | 8             | 0           | -1.329625               | 3.052886  | 0.805237  |
| 25            | 1             | 0           | -0.708872               | 2.584928  | 1.391181  |
| 26            | 1             | 0           | -1.336549               | 3.962404  | 1.115852  |
| 27            | 6             | 0           | 3.393778                | -1.103346 | 0.486392  |
| 28            | 1             | 0           | 3.868414                | -0.731321 | 1.402365  |
| 29            | 1             | 0           | 3.988972                | -1.966896 | 0.168610  |
| 30            | 16            | 0           | -2.950211               | -1.385621 | 0.164270  |

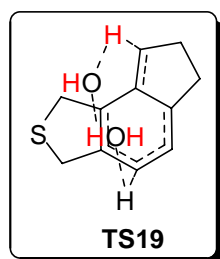

(Nimag=1) -913.4546

| Center Number | Atomic Number | Atomic Type | Coordinates (Angstroms) |           |           |
|---------------|---------------|-------------|-------------------------|-----------|-----------|
|               |               |             | X                       | Y         | Z         |
| 1             | 6             | 0           | 0.804824                | -0.671821 | -0.405283 |
| 2             | 6             | 0           | -0.614060               | -0.518992 | -0.339218 |
| 3             | 6             | 0           | -1.183601               | 0.703234  | -0.616852 |
| 4             | 6             | 0           | -0.385123               | 1.848783  | -0.912323 |
| 5             | 6             | 0           | 1.006672                | 1.627938  | -1.205549 |
| 6             | 6             | 0           | 1.583765                | 0.420919  | -0.936335 |
| 7             | 6             | 0           | 1.637792                | -1.679686 | 0.094989  |
| 8             | 6             | 0           | 3.051792                | 0.027650  | -0.908372 |
| 9             | 6             | 0           | -1.542929               | -1.619381 | 0.090866  |
| 10            | 6             | 0           | -2.685235               | 0.765723  | -0.508638 |
| 11            | 1             | 0           | 3.589947                | 0.640705  | -0.173959 |
| 12            | 1             | 0           | 3.553117                | 0.178881  | -1.867985 |
| 13            | 1             | 0           | 1.277342                | -2.675039 | 0.335766  |
| 14            | 1             | 0           | -3.009177               | 1.520447  | 0.212870  |
| 15            | 1             | 0           | -3.139801               | 1.002720  | -1.474242 |
| 16            | 1             | 0           | -1.323926               | -1.963461 | 1.106530  |
| 17            | 1             | 0           | -1.491677               | -2.484046 | -0.576995 |
| 18            | 1             | 0           | -0.092590               | 2.034864  | 0.667753  |
| 19            | 1             | 0           | 0.790168                | 2.764029  | 1.898839  |
| 20            | 8             | 0           | 0.201159                | 2.015165  | 1.742400  |
| 21            | 1             | 0           | 1.472588                | -0.770572 | 1.598997  |
| 22            | 1             | 0           | 1.606115                | 2.462255  | -1.561336 |
| 23            | 1             | 0           | -0.868951               | 2.750496  | -1.275185 |
| 24            | 8             | 0           | 1.253380                | -0.101903 | 2.387589  |
| 25            | 1             | 0           | 1.918205                | -0.175400 | 3.079397  |
| 26            | 1             | 0           | 0.696860                | 1.082439  | 2.049603  |
| 27            | 16            | 0           | -3.248289               | -0.905292 | 0.045410  |
| 28            | 6             | 0           | 3.042372                | -1.468121 | -0.468524 |
| 29            | 1             | 0           | 3.845137                | -1.688788 | 0.242439  |
| 30            | 1             | 0           | 3.215335                | -2.118414 | -1.337513 |

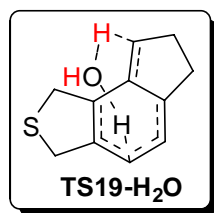

(Nimag=1) -1347.8916

| Center Number | Atomic Number | Atomic Type | Coordinates (Angstroms) |           |           |
|---------------|---------------|-------------|-------------------------|-----------|-----------|
|               |               |             | X                       | Y         | Z         |
| 1             | 6             | 0           | 0.848098                | -0.588617 | -0.311860 |
| 2             | 6             | 0           | -0.571464               | -0.412213 | -0.324941 |
| 3             | 6             | 0           | -1.048454               | 0.870397  | -0.216306 |
| 4             | 6             | 0           | -0.145032               | 1.978556  | -0.110996 |
| 5             | 6             | 0           | 1.190769                | 1.781759  | -0.627863 |
| 6             | 6             | 0           | 1.679601                | 0.516875  | -0.744707 |
| 7             | 6             | 0           | 1.634655                | -1.515360 | 0.377562  |
| 8             | 6             | 0           | 3.111894                | 0.023786  | -0.830296 |
| 9             | 6             | 0           | -1.570471               | -1.522167 | -0.149839 |
| 10            | 6             | 0           | -2.536171               | 1.000719  | -0.024239 |
| 11            | 1             | 0           | 3.831448                | 0.770259  | -0.484093 |
| 12            | 1             | 0           | 3.382214                | -0.222688 | -1.862201 |
| 13            | 1             | 0           | 1.285469                | -2.485665 | 0.713861  |
| 14            | 1             | 0           | -2.775164               | 1.436035  | 0.950444  |
| 15            | 1             | 0           | -2.989177               | 1.626878  | -0.796634 |
| 16            | 1             | 0           | -1.422907               | -2.058060 | 0.794389  |
| 17            | 1             | 0           | -1.534845               | -2.251504 | -0.962482 |
| 18            | 1             | 0           | 0.335597                | 1.376182  | 1.321373  |
| 19            | 1             | 0           | 1.467084                | 1.025987  | 2.587526  |
| 20            | 8             | 0           | 0.770932                | 0.608455  | 2.061567  |
| 21            | 1             | 0           | 1.160120                | -0.307851 | 1.579368  |
| 22            | 1             | 0           | 1.831398                | 2.647028  | -0.772423 |
| 23            | 1             | 0           | -0.553484               | 2.983418  | -0.084088 |
| 24            | 16            | 0           | -3.230129               | -0.707339 | -0.154356 |
| 25            | 6             | 0           | 3.111166                | -1.271559 | 0.052455  |
| 26            | 1             | 0           | 3.723919                | -1.149234 | 0.953202  |
| 27            | 1             | 0           | 3.545382                | -2.114059 | -0.494906 |

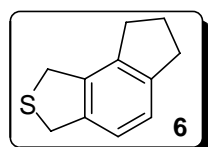

(Nimag=0)

| Center | Atomic | Atomic | Coordinates (Angstroms) |  |  |
|--------|--------|--------|-------------------------|--|--|
|--------|--------|--------|-------------------------|--|--|

| Number | Number | Type | X         | Y         | Z         |
|--------|--------|------|-----------|-----------|-----------|
| 1      | 6      | 0    | 3.217882  | -1.130351 | 0.259083  |
| 2      | 6      | 0    | 3.208662  | 0.362522  | -0.151731 |
| 3      | 6      | 0    | 1.804610  | -1.658171 | -0.094363 |
| 4      | 1      | 0    | 4.015227  | -1.699085 | -0.223383 |
| 5      | 1      | 0    | 3.368444  | -1.205622 | 1.340064  |
| 6      | 1      | 0    | 3.565274  | 0.487939  | -1.182140 |
| 7      | 1      | 0    | 3.850151  | 0.979009  | 0.483456  |
| 8      | 1      | 0    | 1.469174  | -2.446187 | 0.585739  |
| 9      | 1      | 0    | 1.783639  | -2.084668 | -1.106103 |
| 10     | 6      | 0    | 0.947655  | -0.412001 | -0.035754 |
| 11     | 6      | 0    | 1.744466  | 0.737233  | -0.060704 |
| 12     | 6      | 0    | -0.441462 | -0.300732 | 0.009158  |
| 13     | 6      | 0    | -1.395962 | -1.466980 | 0.043401  |
| 14     | 1      | 0    | -1.239049 | -2.151065 | -0.793644 |
| 15     | 6      | 0    | -2.531931 | 0.991901  | 0.132053  |
| 16     | 1      | 0    | -2.980078 | 1.603722  | -0.653523 |
| 17     | 1      | 0    | -2.871028 | 1.372529  | 1.099211  |
| 18     | 6      | 0    | -1.025505 | 0.969164  | 0.044131  |
| 19     | 6      | 0    | -0.227401 | 2.115302  | 0.025100  |
| 20     | 1      | 0    | -0.688672 | 3.096970  | 0.056355  |
| 21     | 6      | 0    | 1.162312  | 2.002316  | -0.032879 |
| 22     | 1      | 0    | 1.778115  | 2.895518  | -0.052916 |
| 23     | 1      | 0    | -1.299777 | -2.038313 | 0.971250  |
| 24     | 16     | 0    | -3.095710 | -0.754498 | -0.084333 |

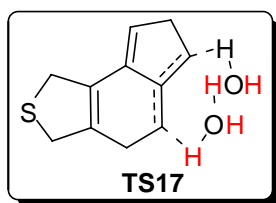

(Nimag=1) -1361.7155

| Center Number | Atomic Number | Atomic Type | Coordinates (Angstroms) |           |           |
|---------------|---------------|-------------|-------------------------|-----------|-----------|
|               |               |             | X                       | Y         | Z         |
| 1             | 6             | 0           | 0.242278                | 1.019636  | 0.203231  |
| 2             | 6             | 0           | -1.101257               | 0.490509  | 0.018030  |
| 3             | 6             | 0           | -1.423206               | -0.721841 | 0.498972  |
| 4             | 6             | 0           | -0.470287               | -1.600935 | 1.263228  |
| 5             | 6             | 0           | 1.001727                | -1.191000 | 1.109949  |
| 6             | 6             | 0           | 1.262651                | 0.179963  | 0.800957  |
| 7             | 6             | 0           | 0.784800                | 2.236030  | -0.076024 |

|    |    |   |           |           |           |
|----|----|---|-----------|-----------|-----------|
| 8  | 6  | 0 | 2.532540  | 0.860644  | 0.762020  |
| 9  | 6  | 0 | -2.178379 | 1.254610  | -0.700060 |
| 10 | 6  | 0 | -2.833905 | -1.177764 | 0.263668  |
| 11 | 1  | 0 | 3.125553  | 0.283566  | -0.121633 |
| 12 | 1  | 0 | 3.194311  | 0.713801  | 1.616610  |
| 13 | 1  | 0 | 0.262052  | 3.062798  | -0.542579 |
| 14 | 1  | 0 | -2.858089 | -2.075563 | -0.361933 |
| 15 | 1  | 0 | -3.346694 | -1.408678 | 1.202438  |
| 16 | 1  | 0 | -1.917617 | 1.425468  | -1.748675 |
| 17 | 1  | 0 | -2.369140 | 2.225512  | -0.233662 |
| 18 | 1  | 0 | -0.592346 | -2.639698 | 0.936183  |
| 19 | 8  | 0 | 1.999755  | -2.216448 | -1.221006 |
| 20 | 1  | 0 | 2.308045  | -3.127881 | -1.234666 |
| 21 | 1  | 0 | 1.419688  | -1.700851 | 0.093089  |
| 22 | 1  | 0 | 1.663032  | -1.616283 | 1.867693  |
| 23 | 1  | 0 | -0.764695 | -1.591296 | 2.322929  |
| 24 | 8  | 0 | 3.825041  | -0.632567 | -1.110364 |
| 25 | 1  | 0 | 2.941501  | -1.482391 | -1.245441 |
| 26 | 1  | 0 | 4.056880  | -0.249158 | -1.961769 |
| 27 | 6  | 0 | 2.224552  | 2.298672  | 0.327522  |
| 28 | 1  | 0 | 2.861975  | 2.649508  | -0.492972 |
| 29 | 1  | 0 | 2.367572  | 3.014604  | 1.148119  |
| 30 | 16 | 0 | -3.699968 | 0.213594  | -0.588858 |

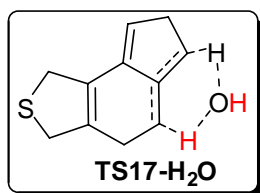

(Nimag=1) -1859.7707

| Center Number | Atomic Number | Atomic Type | Coordinates (Angstroms) |           |           |
|---------------|---------------|-------------|-------------------------|-----------|-----------|
|               |               |             | X                       | Y         | Z         |
| 1             | 6             | 0           | -0.571387               | 0.846539  | -0.211256 |
| 2             | 6             | 0           | 0.817419                | 0.431692  | -0.081342 |
| 3             | 6             | 0           | 1.158338                | -0.861145 | -0.229072 |
| 4             | 6             | 0           | 0.190629                | -1.965243 | -0.567129 |
| 5             | 6             | 0           | -1.277406               | -1.536939 | -0.578293 |
| 6             | 6             | 0           | -1.568553               | -0.148113 | -0.580869 |
| 7             | 6             | 0           | -1.192396               | 2.035400  | 0.002107  |
| 8             | 6             | 0           | -2.873659               | 0.414394  | -0.428421 |
| 9             | 6             | 0           | 1.920005                | 1.400317  | 0.246517  |
| 10            | 6             | 0           | 2.613936                | -1.188709 | -0.054337 |

|    |    |   |           |           |           |
|----|----|---|-----------|-----------|-----------|
| 11 | 1  | 0 | -3.114598 | -0.323324 | 0.597624  |
| 12 | 1  | 0 | -3.680891 | 0.087964  | -1.082700 |
| 13 | 1  | 0 | -0.706237 | 2.954898  | 0.305574  |
| 14 | 1  | 0 | 2.769012  | -1.886299 | 0.774651  |
| 15 | 1  | 0 | 3.034427  | -1.643990 | -0.956468 |
| 16 | 1  | 0 | 1.758032  | 1.883514  | 1.214515  |
| 17 | 1  | 0 | 2.008898  | 2.182709  | -0.512541 |
| 18 | 1  | 0 | 0.333398  | -2.795565 | 0.137087  |
| 19 | 8  | 0 | -3.099810 | -1.528929 | 1.372512  |
| 20 | 1  | 0 | -2.806149 | -1.315917 | 2.265259  |
| 21 | 1  | 0 | -1.939803 | -1.689572 | 0.505995  |
| 22 | 1  | 0 | -1.924318 | -2.159446 | -1.199749 |
| 23 | 1  | 0 | 0.472760  | -2.377615 | -1.546589 |
| 24 | 6  | 0 | -2.678262 | 1.907970  | -0.175597 |
| 25 | 1  | 0 | -3.036391 | 2.524661  | -1.010721 |
| 26 | 1  | 0 | -3.215501 | 2.266874  | 0.712292  |
| 27 | 16 | 0 | 3.475866  | 0.406598  | 0.297614  |

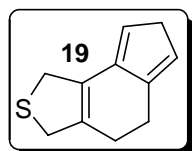

(Nimag=0)

| Center Number | Atomic Number | Atomic Type | Coordinates (Angstroms) |           |           |
|---------------|---------------|-------------|-------------------------|-----------|-----------|
|               |               |             | X                       | Y         | Z         |
| 1             | 6             | 0           | -2.443350               | 0.980236  | 0.139504  |
| 2             | 6             | 0           | -1.411477               | -1.499305 | -0.140667 |
| 3             | 1             | 0           | -2.796100               | 1.402292  | 1.086536  |
| 4             | 1             | 0           | -2.821359               | 1.614820  | -0.668629 |
| 5             | 1             | 0           | -1.297561               | -2.043359 | -1.081926 |
| 6             | 1             | 0           | -1.293033               | -2.211654 | 0.680600  |
| 7             | 6             | 0           | -0.432480               | -0.361940 | -0.032081 |
| 8             | 6             | 0           | -0.946044               | 0.874163  | 0.105814  |
| 9             | 6             | 0           | -0.092002               | 2.105219  | 0.294078  |
| 10            | 1             | 0           | 0.022508                | 2.290816  | 1.371186  |
| 11            | 1             | 0           | -0.605189               | 2.984323  | -0.109247 |
| 12            | 6             | 0           | 1.008251                | -0.562843 | -0.021173 |
| 13            | 6             | 0           | 1.761425                | -1.679734 | 0.113107  |
| 14            | 1             | 0           | 1.406324                | -2.695673 | 0.222343  |
| 15            | 6             | 0           | 3.176657                | 0.208069  | -0.012496 |
| 16            | 1             | 0           | 4.059931                | 0.832465  | -0.053828 |
| 17            | 6             | 0           | 1.898021                | 0.615096  | -0.113549 |



|    |    |   |           |           |           |
|----|----|---|-----------|-----------|-----------|
| 18 | 6  | 0 | 1.298294  | 1.968069  | -0.363924 |
| 19 | 1  | 0 | 1.963552  | 2.767519  | -0.027517 |
| 20 | 1  | 0 | 1.174908  | 2.094051  | -1.447361 |
| 21 | 6  | 0 | 3.215461  | -1.291406 | 0.135120  |
| 22 | 1  | 0 | 3.707262  | -1.607338 | 1.065716  |
| 23 | 1  | 0 | 3.782386  | -1.764520 | -0.679237 |
| 24 | 16 | 0 | -3.093760 | -0.737342 | -0.061314 |

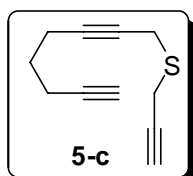

(Nimag=0)

| Center Number | Atomic Number | Atomic Type | Coordinates (Angstroms) |           |           |
|---------------|---------------|-------------|-------------------------|-----------|-----------|
|               |               |             | X                       | Y         | Z         |
| 1             | 6             | 0           | 3.430757                | 1.467009  | 0.202594  |
| 2             | 6             | 0           | 2.797149                | 2.488536  | 0.171380  |
| 3             | 1             | 0           | 2.223146                | 3.381902  | 0.145581  |
| 4             | 6             | 0           | 4.254087                | 0.260133  | 0.222822  |
| 5             | 6             | 0           | 3.660048                | -0.976499 | -0.486093 |
| 6             | 1             | 0           | 4.490129                | 0.003240  | 1.262813  |
| 7             | 1             | 0           | 5.211804                | 0.500590  | -0.252527 |
| 8             | 6             | 0           | 2.542837                | -1.712910 | 0.282686  |
| 9             | 1             | 0           | 3.301389                | -0.695591 | -1.479497 |
| 10            | 1             | 0           | 4.477567                | -1.690009 | -0.630457 |
| 11            | 1             | 0           | 2.394711                | -2.693130 | -0.185218 |
| 12            | 1             | 0           | 2.883478                | -1.918109 | 1.305407  |
| 13            | 6             | 0           | 1.250860                | -1.034261 | 0.333329  |
| 14            | 6             | 0           | 0.168548                | -0.507962 | 0.367396  |
| 15            | 6             | 0           | -1.118500               | 0.158357  | 0.399861  |
| 16            | 1             | 0           | -0.986217               | 1.243852  | 0.435828  |
| 17            | 1             | 0           | -1.697174               | -0.152582 | 1.273194  |
| 18            | 6             | 0           | -3.650993               | 0.653663  | -0.729046 |
| 19            | 1             | 0           | -4.271838               | 0.526600  | -1.619471 |
| 20            | 1             | 0           | -3.423832               | 1.719636  | -0.639375 |
| 21            | 6             | 0           | -4.351850               | 0.178788  | 0.451656  |
| 22            | 6             | 0           | -4.920442               | -0.207625 | 1.438574  |
| 23            | 1             | 0           | -5.427780               | -0.555853 | 2.304850  |
| 24            | 16            | 0           | -2.096900               | -0.267120 | -1.115755 |

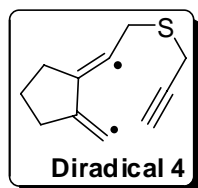

(Nimag=0)

| Center Number | Atomic Number | Atomic Type | Coordinates (Angstroms) |           |           |
|---------------|---------------|-------------|-------------------------|-----------|-----------|
|               |               |             | X                       | Y         | Z         |
| 1             | 6             | 0           | -2.133217               | 0.882457  | 0.341875  |
| 2             | 6             | 0           | -2.025159               | 2.024692  | 0.986262  |
| 3             | 1             | 0           | -2.607146               | 2.921935  | 1.131775  |
| 4             | 6             | 0           | -3.326685               | 0.466626  | -0.532478 |
| 5             | 6             | 0           | -3.261572               | -1.071252 | -0.530386 |
| 6             | 1             | 0           | -3.173153               | 0.850158  | -1.548030 |
| 7             | 1             | 0           | -4.273631               | 0.865654  | -0.166168 |
| 8             | 6             | 0           | -1.754450               | -1.382399 | -0.501635 |
| 9             | 1             | 0           | -3.737065               | -1.459267 | 0.375693  |
| 10            | 1             | 0           | -3.768929               | -1.515638 | -1.390026 |
| 11            | 1             | 0           | -1.524688               | -2.367859 | -0.090088 |
| 12            | 1             | 0           | -1.332013               | -1.344941 | -1.512758 |
| 13            | 6             | 0           | -1.158301               | -0.241245 | 0.333627  |
| 14            | 6             | 0           | 0.020290                | -0.267131 | 0.926719  |
| 15            | 6             | 0           | 1.148653                | -1.181385 | 1.107854  |
| 16            | 1             | 0           | 0.798495                | -2.218140 | 1.211456  |
| 17            | 1             | 0           | 1.719093                | -0.950165 | 2.011978  |
| 18            | 6             | 0           | 3.264719                | 0.321311  | -0.093718 |
| 19            | 1             | 0           | 4.130079                | 0.220532  | -0.754010 |
| 20            | 1             | 0           | 3.642597                | 0.369782  | 0.931225  |
| 21            | 6             | 0           | 2.514085                | 1.520239  | -0.421679 |
| 22            | 6             | 0           | 1.904012                | 2.522128  | -0.684835 |
| 23            | 1             | 0           | 1.344174                | 3.396236  | -0.910701 |
| 24            | 16            | 0           | 2.351746                | -1.270783 | -0.304998 |

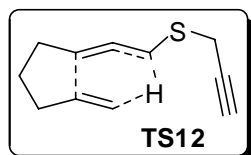

(Nimag=1) -1045.8439

| Center Number | Atomic Number | Atomic Type | Coordinates (Angstroms) |          |           |
|---------------|---------------|-------------|-------------------------|----------|-----------|
|               |               |             | X                       | Y        | Z         |
| 1             | 6             | 0           | 1.864702                | 1.226025 | -0.071580 |

|    |    |   |           |           |           |
|----|----|---|-----------|-----------|-----------|
| 2  | 6  | 0 | 3.348373  | 1.209205  | -0.109278 |
| 3  | 6  | 0 | 3.894500  | -0.204252 | -0.357062 |
| 4  | 1  | 0 | 3.718313  | 1.581112  | 0.854392  |
| 5  | 1  | 0 | 3.698334  | 1.907400  | -0.875980 |
| 6  | 6  | 0 | 3.149968  | -1.167388 | 0.585052  |
| 7  | 1  | 0 | 3.702037  | -0.492451 | -1.394625 |
| 8  | 1  | 0 | 4.974468  | -0.244931 | -0.194144 |
| 9  | 1  | 0 | 3.311354  | -2.210880 | 0.301492  |
| 10 | 1  | 0 | 3.520999  | -1.048551 | 1.610354  |
| 11 | 6  | 0 | 1.717967  | -0.835179 | 0.538387  |
| 12 | 6  | 0 | 0.493192  | -1.014078 | 0.615125  |
| 13 | 6  | 0 | -0.748562 | -0.399438 | 0.473982  |
| 14 | 1  | 0 | -0.262697 | 0.757812  | 0.142807  |
| 15 | 1  | 0 | -1.327812 | -0.239252 | 1.385063  |
| 16 | 6  | 0 | -3.071976 | 0.323929  | -0.910736 |
| 17 | 1  | 0 | -3.725793 | 0.057587  | -1.744986 |
| 18 | 1  | 0 | -2.587175 | 1.270168  | -1.161934 |
| 19 | 6  | 0 | -3.840397 | 0.450617  | 0.315544  |
| 20 | 6  | 0 | -4.464680 | 0.563788  | 1.337309  |
| 21 | 1  | 0 | -5.022216 | 0.657247  | 2.237008  |
| 22 | 16 | 0 | -1.799693 | -1.016542 | -0.882405 |
| 23 | 6  | 0 | 0.750837  | 1.777827  | -0.184687 |
| 24 | 1  | 0 | 0.231740  | 2.683081  | -0.433294 |

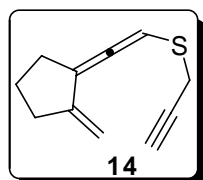

(Nimag=0)

| Center Number | Atomic Number | Atomic Type | Coordinates (Angstroms) |           |           |
|---------------|---------------|-------------|-------------------------|-----------|-----------|
|               |               |             | X                       | Y         | Z         |
| 1             | 6             | 0           | 2.461304                | 0.975615  | 0.065092  |
| 2             | 6             | 0           | 3.909872                | 0.518882  | 0.122098  |
| 3             | 6             | 0           | 3.842939                | -0.992107 | -0.168401 |
| 4             | 1             | 0           | 4.303069                | 0.685137  | 1.133167  |
| 5             | 1             | 0           | 4.549151                | 1.069727  | -0.570571 |
| 6             | 6             | 0           | 2.520653                | -1.434141 | 0.488133  |
| 7             | 1             | 0           | 3.792022                | -1.159101 | -1.248809 |
| 8             | 1             | 0           | 4.707092                | -1.539963 | 0.213235  |
| 9             | 1             | 0           | 2.097174                | -2.341931 | 0.056347  |
| 10            | 1             | 0           | 2.671850                | -1.618321 | 1.558626  |
| 11            | 6             | 0           | 1.608907                | -0.220556 | 0.310302  |

|    |    |   |           |           |           |
|----|----|---|-----------|-----------|-----------|
| 12 | 6  | 0 | 0.299819  | -0.246313 | 0.355291  |
| 13 | 6  | 0 | -1.002072 | -0.292820 | 0.398745  |
| 14 | 1  | 0 | -1.555812 | -0.165899 | 1.326657  |
| 15 | 6  | 0 | -3.402050 | 0.491261  | -0.804018 |
| 16 | 1  | 0 | -4.043377 | 0.318515  | -1.672065 |
| 17 | 1  | 0 | -3.009403 | 1.507740  | -0.875724 |
| 18 | 6  | 0 | -4.151650 | 0.312332  | 0.426200  |
| 19 | 6  | 0 | -4.762902 | 0.172131  | 1.452421  |
| 20 | 1  | 0 | -5.309210 | 0.043183  | 2.354676  |
| 21 | 6  | 0 | 2.035954  | 2.216637  | -0.185777 |
| 22 | 1  | 0 | 2.734511  | 3.024039  | -0.373892 |
| 23 | 1  | 0 | 0.979252  | 2.458200  | -0.211092 |
| 24 | 16 | 0 | -2.005060 | -0.705429 | -1.028192 |

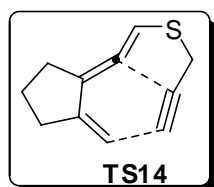

(Nimag=1) -497.6761

| Center Number | Atomic Number | Atomic Type | Coordinates (Angstroms) |           |           |
|---------------|---------------|-------------|-------------------------|-----------|-----------|
|               |               |             | X                       | Y         | Z         |
| 1             | 6             | 0           | 3.154351                | 0.280971  | 0.006502  |
| 2             | 6             | 0           | 1.770680                | -1.714250 | 0.298002  |
| 3             | 1             | 0           | 3.862630                | 0.055813  | -0.800853 |
| 4             | 1             | 0           | 3.547400                | 1.152024  | 0.537972  |
| 5             | 1             | 0           | 1.190854                | -2.282787 | 1.027070  |
| 6             | 1             | 0           | 2.118093                | -2.424674 | -0.463487 |
| 7             | 6             | 0           | 0.956544                | -0.614264 | -0.375810 |
| 8             | 6             | 0           | 1.775493                | 0.529984  | -0.579981 |
| 9             | 6             | 0           | 1.299139                | 1.715293  | -1.070954 |
| 10            | 1             | 0           | 0.424227                | 1.742070  | -1.704207 |
| 11            | 1             | 0           | 1.931535                | 2.597699  | -1.088335 |
| 12            | 6             | 0           | -0.391995               | -0.587889 | -0.489784 |
| 13            | 6             | 0           | -1.547152               | -1.057854 | -0.911218 |
| 14            | 1             | 0           | -1.642314               | -1.723467 | -1.763522 |
| 15            | 6             | 0           | -2.310454               | 0.447753  | 1.132705  |
| 16            | 1             | 0           | -3.076475               | 1.144030  | 1.478584  |
| 17            | 1             | 0           | -2.024641               | -0.210241 | 1.956497  |
| 18            | 6             | 0           | -1.127351               | 1.157231  | 0.617411  |
| 19            | 6             | 0           | -0.427024               | 2.164605  | 0.483730  |
| 20            | 1             | 0           | -0.101502               | 3.173548  | 0.586119  |
| 21            | 6             | 0           | 2.959361                | -0.948867 | 0.920640  |

|    |    |   |           |           |           |
|----|----|---|-----------|-----------|-----------|
| 22 | 1  | 0 | 3.859612  | -1.561299 | 1.009380  |
| 23 | 1  | 0 | 2.685699  | -0.615282 | 1.926211  |
| 24 | 16 | 0 | -3.090292 | -0.580232 | -0.180555 |

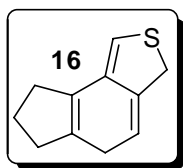

(Nimag=0)

| Center Number | Atomic Number | Atomic Type | Coordinates (Angstroms) |           |           |
|---------------|---------------|-------------|-------------------------|-----------|-----------|
|               |               |             | X                       | Y         | Z         |
| 1             | 6             | 0           | 3.220458                | -1.199248 | 0.199813  |
| 2             | 6             | 0           | 3.183646                | 0.322698  | -0.095734 |
| 3             | 6             | 0           | 1.783410                | -1.712916 | -0.078881 |
| 4             | 1             | 0           | 3.975970                | -1.724389 | -0.387964 |
| 5             | 1             | 0           | 3.462787                | -1.356506 | 1.254088  |
| 6             | 1             | 0           | 3.582126                | 0.556127  | -1.093514 |
| 7             | 1             | 0           | 3.783718                | 0.901469  | 0.615600  |
| 8             | 1             | 0           | 1.465182                | -2.467416 | 0.647615  |
| 9             | 1             | 0           | 1.700176                | -2.177281 | -1.070247 |
| 10            | 6             | 0           | 0.950845                | -0.453047 | -0.017614 |
| 11            | 6             | 0           | 1.713905                | 0.656066  | -0.026396 |
| 12            | 6             | 0           | -0.495555               | -0.366751 | -0.004827 |
| 13            | 6             | 0           | -1.401113               | -1.368941 | -0.031579 |
| 14            | 1             | 0           | -1.186808               | -2.428198 | -0.065809 |
| 15            | 6             | 0           | -2.607579               | 0.924571  | 0.077989  |
| 16            | 1             | 0           | -3.071047               | 1.454633  | -0.754592 |
| 17            | 1             | 0           | -2.996926               | 1.331117  | 1.012548  |
| 18            | 6             | 0           | -1.090829               | 0.974719  | 0.025494  |
| 19            | 6             | 0           | -0.344075               | 2.088281  | 0.012415  |
| 20            | 1             | 0           | -0.815039               | 3.067264  | 0.030504  |
| 21            | 6             | 0           | 1.164100                | 2.050458  | -0.027182 |
| 22            | 1             | 0           | 1.576338                | 2.615877  | 0.824135  |
| 23            | 1             | 0           | 1.529406                | 2.594785  | -0.913557 |
| 24            | 16            | 0           | -3.091823               | -0.866426 | -0.018737 |

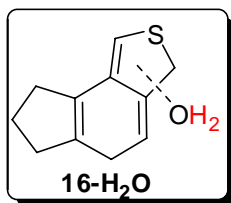

(Nimag=0)

| Center Number | Atomic Number | Atomic Type | Coordinates (Angstroms) |           |           |
|---------------|---------------|-------------|-------------------------|-----------|-----------|
|               |               |             | X                       | Y         | Z         |
| 1             | 6             | 0           | 0.227166                | -0.516992 | -0.264998 |
| 2             | 6             | 0           | -1.205437               | -0.491575 | -0.046511 |
| 3             | 6             | 0           | -1.898965               | 0.660260  | -0.125703 |
| 4             | 6             | 0           | -1.281477               | 1.989872  | -0.438105 |
| 5             | 6             | 0           | 0.200029                | 1.903785  | -0.714959 |
| 6             | 6             | 0           | 0.873544                | 0.743778  | -0.657481 |
| 7             | 6             | 0           | 1.092317                | -1.540594 | -0.091573 |
| 8             | 6             | 0           | 2.335388                | 0.538737  | -1.002427 |
| 9             | 6             | 0           | -2.082982               | -1.653871 | 0.356207  |
| 10            | 6             | 0           | -3.356414               | 0.457632  | 0.207163  |
| 11            | 1             | 0           | 2.994990                | 1.285226  | -0.561104 |
| 12            | 1             | 0           | 2.484690                | 0.526875  | -2.084069 |
| 13            | 1             | 0           | 0.848318                | -2.543416 | 0.230206  |
| 14            | 1             | 0           | -3.584461               | 0.881412  | 1.195481  |
| 15            | 1             | 0           | -4.026093               | 0.957387  | -0.501672 |
| 16            | 1             | 0           | -1.877666               | -1.944748 | 1.394592  |
| 17            | 1             | 0           | -1.915264               | -2.544201 | -0.257984 |
| 18            | 1             | 0           | -1.468118               | 2.692833  | 0.389855  |
| 19            | 1             | 0           | 1.572038                | 1.297778  | 1.860009  |
| 20            | 8             | 0           | 2.307068                | 1.115382  | 2.456344  |
| 21            | 1             | 0           | 2.676809                | 0.288256  | 2.121664  |
| 22            | 1             | 0           | 0.710913                | 2.822754  | -0.988262 |
| 23            | 1             | 0           | -1.793587               | 2.449136  | -1.298753 |
| 24            | 6             | 0           | -3.516246               | -1.084851 | 0.188986  |
| 25            | 1             | 0           | -4.203750               | -1.445763 | 0.956181  |
| 26            | 1             | 0           | -3.918074               | -1.395057 | -0.779070 |
| 27            | 16            | 0           | 2.795073                | -1.143038 | -0.361964 |

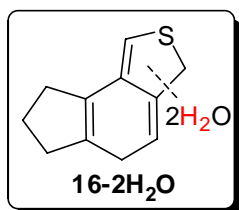

(Nimag=0)

| Center Number | Atomic Number | Atomic Type | Coordinates (Angstroms) |          |           |
|---------------|---------------|-------------|-------------------------|----------|-----------|
|               |               |             | X                       | Y        | Z         |
| 1             | 6             | 0           | -0.262524               | 0.878629 | 0.072686  |
| 2             | 6             | 0           | -1.622568               | 0.417631 | -0.121702 |

|    |    |   |           |           |           |
|----|----|---|-----------|-----------|-----------|
| 3  | 6  | 0 | -2.034678 | -0.766986 | 0.368268  |
| 4  | 6  | 0 | -1.157838 | -1.702572 | 1.146200  |
| 5  | 6  | 0 | 0.257073  | -1.190638 | 1.301209  |
| 6  | 6  | 0 | 0.645237  | 0.008928  | 0.829244  |
| 7  | 6  | 0 | 0.320466  | 2.014305  | -0.374644 |
| 8  | 6  | 0 | 2.011428  | 0.639328  | 1.023902  |
| 9  | 6  | 0 | -2.712592 | 1.116488  | -0.900934 |
| 10 | 6  | 0 | -3.467986 | -1.058069 | -0.001011 |
| 11 | 1  | 0 | 2.833870  | 0.010005  | 0.679604  |
| 12 | 1  | 0 | 2.176102  | 0.901879  | 2.070442  |
| 13 | 1  | 0 | -0.155295 | 2.785617  | -0.964962 |
| 14 | 1  | 0 | -3.514505 | -1.846143 | -0.766346 |
| 15 | 1  | 0 | -4.058346 | -1.421919 | 0.847627  |
| 16 | 1  | 0 | -2.495092 | 1.081750  | -1.976349 |
| 17 | 1  | 0 | -2.809842 | 2.174062  | -0.635737 |
| 18 | 1  | 0 | -1.159541 | -2.699131 | 0.674270  |
| 19 | 8  | 0 | 1.734259  | -2.298331 | -1.471241 |
| 20 | 1  | 0 | 1.434430  | -3.211659 | -1.510790 |
| 21 | 1  | 0 | 1.186130  | -1.868615 | -0.794974 |
| 22 | 1  | 0 | 0.951177  | -1.805493 | 1.867836  |
| 23 | 1  | 0 | -1.595430 | -1.883304 | 2.141851  |
| 24 | 8  | 0 | 4.250565  | -1.422333 | -0.504966 |
| 25 | 1  | 0 | 3.488850  | -1.806519 | -0.973048 |
| 26 | 1  | 0 | 4.813465  | -1.051361 | -1.190307 |
| 27 | 16 | 0 | 2.016342  | 2.215069  | 0.040853  |
| 28 | 6  | 0 | -3.982791 | 0.302282  | -0.539711 |
| 29 | 1  | 0 | -4.663645 | 0.189621  | -1.385603 |
| 30 | 1  | 0 | -4.531747 | 0.819450  | 0.251444  |

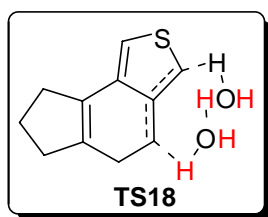

(Nimag=1) -1259.7125

| Center Number | Atomic Number | Atomic Type | Coordinates (Angstroms) |           |           |
|---------------|---------------|-------------|-------------------------|-----------|-----------|
|               |               |             | X                       | Y         | Z         |
| 1             | 6             | 0           | 0.092485                | -0.885578 | 0.098410  |
| 2             | 6             | 0           | 1.485834                | -0.520742 | -0.108401 |
| 3             | 6             | 0           | 1.974469                | 0.628627  | 0.388082  |
| 4             | 6             | 0           | 1.171397                | 1.601550  | 1.200149  |
| 5             | 6             | 0           | -0.345978               | 1.375757  | 1.074690  |

|    |    |   |           |           |           |
|----|----|---|-----------|-----------|-----------|
| 6  | 6  | 0 | -0.776230 | 0.042013  | 0.740884  |
| 7  | 6  | 0 | -0.554906 | -2.052903 | -0.246104 |
| 8  | 6  | 0 | -2.160765 | -0.401974 | 0.769407  |
| 9  | 6  | 0 | 2.516702  | -1.294418 | -0.894923 |
| 10 | 6  | 0 | 3.423342  | 0.819290  | 0.018854  |
| 11 | 1  | 0 | -2.745483 | 0.284575  | -0.026623 |
| 12 | 1  | 0 | -2.709522 | -0.267075 | 1.701297  |
| 13 | 1  | 0 | -0.109603 | -2.895906 | -0.757664 |
| 14 | 1  | 0 | 3.514449  | 1.619369  | -0.728167 |
| 15 | 1  | 0 | 4.038553  | 1.125145  | 0.872333  |
| 16 | 1  | 0 | 2.290536  | -1.252976 | -1.968302 |
| 17 | 1  | 0 | 2.552344  | -2.355233 | -0.623789 |
| 18 | 1  | 0 | 1.408498  | 2.626234  | 0.891316  |
| 19 | 8  | 0 | -1.333875 | 2.628047  | -1.135356 |
| 20 | 1  | 0 | -1.448874 | 3.583011  | -1.107731 |
| 21 | 1  | 0 | -0.734734 | 1.988152  | 0.106223  |
| 22 | 1  | 0 | -0.923278 | 1.831005  | 1.882707  |
| 23 | 1  | 0 | 1.491608  | 1.531413  | 2.250837  |
| 24 | 8  | 0 | -3.389070 | 1.369955  | -0.883336 |
| 25 | 1  | 0 | -2.453092 | 2.036866  | -1.070172 |
| 26 | 1  | 0 | -3.735757 | 1.074929  | -1.731033 |
| 27 | 6  | 0 | 3.841719  | -0.561819 | -0.550621 |
| 28 | 1  | 0 | 4.506192  | -0.476003 | -1.412114 |
| 29 | 1  | 0 | 4.378691  | -1.124340 | 0.217314  |
| 30 | 16 | 0 | -2.221586 | -2.113251 | 0.169409  |

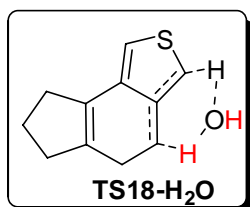

(Nimag=1) -1837.3712

| Center Number | Atomic Number | Atomic Type | Coordinates (Angstroms) |           |           |
|---------------|---------------|-------------|-------------------------|-----------|-----------|
|               |               |             | X                       | Y         | Z         |
| 1             | 6             | 0           | 0.201996                | -0.696376 | -0.157263 |
| 2             | 6             | 0           | -1.233675               | -0.521445 | -0.003019 |
| 3             | 6             | 0           | -1.802458               | 0.687547  | -0.161690 |
| 4             | 6             | 0           | -1.062022               | 1.938604  | -0.537640 |
| 5             | 6             | 0           | 0.459192                | 1.756604  | -0.595022 |
| 6             | 6             | 0           | 0.981336                | 0.430885  | -0.567297 |
| 7             | 6             | 0           | 0.976835                | -1.801778 | 0.099346  |
| 8             | 6             | 0           | 2.405280                | 0.194255  | -0.456975 |



|    |    |   |           |           |           |
|----|----|---|-----------|-----------|-----------|
| 9  | 6  | 0 | -2.231934 | -1.575782 | 0.412676  |
| 10 | 6  | 0 | -3.284445 | 0.641045  | 0.115524  |
| 11 | 1  | 0 | 2.569025  | 0.977454  | 0.511661  |
| 12 | 1  | 0 | 3.081169  | 0.588326  | -1.213546 |
| 13 | 1  | 0 | 0.622304  | -2.766358 | 0.436798  |
| 14 | 1  | 0 | -3.506700 | 1.148012  | 1.064856  |
| 15 | 1  | 0 | -3.872115 | 1.158288  | -0.651012 |
| 16 | 1  | 0 | -2.086470 | -1.849149 | 1.466366  |
| 17 | 1  | 0 | -2.136750 | -2.501071 | -0.165281 |
| 18 | 1  | 0 | -1.319716 | 2.741624  | 0.166815  |
| 19 | 8  | 0 | 2.317352  | 2.220271  | 1.237766  |
| 20 | 1  | 0 | 2.096998  | 1.997194  | 2.149239  |
| 21 | 1  | 0 | 1.147541  | 2.102627  | 0.448939  |
| 22 | 1  | 0 | 0.965934  | 2.440255  | -1.279949 |
| 23 | 1  | 0 | -1.441286 | 2.289107  | -1.509017 |
| 24 | 6  | 0 | -3.597808 | -0.876686 | 0.179961  |
| 25 | 1  | 0 | -4.013129 | -1.202490 | -0.777025 |
| 26 | 1  | 0 | -4.330594 | -1.122440 | 0.950717  |
| 27 | 16 | 0 | 2.675699  | -1.551549 | -0.092081 |

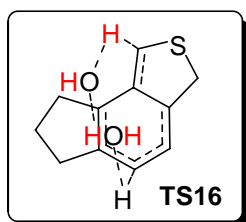

(Nimag=1) -948.7389

| Center Number | Atomic Number | Atomic Type | Coordinates (Angstroms) |           |           |
|---------------|---------------|-------------|-------------------------|-----------|-----------|
|               |               |             | X                       | Y         | Z         |
| 1             | 6             | 0           | 0.479930                | -0.538561 | -0.452803 |
| 2             | 6             | 0           | -0.942169               | -0.676413 | -0.453294 |
| 3             | 6             | 0           | -1.746085               | 0.426028  | -0.636192 |
| 4             | 6             | 0           | -1.204553               | 1.736685  | -0.785778 |
| 5             | 6             | 0           | 0.205089                | 1.820322  | -1.056967 |
| 6             | 6             | 0           | 1.018123                | 0.733018  | -0.892020 |
| 7             | 6             | 0           | 1.425737                | -1.405685 | 0.091722  |
| 8             | 6             | 0           | 2.517650                | 0.688922  | -1.101946 |
| 9             | 6             | 0           | -1.750910               | -1.926122 | -0.199738 |
| 10            | 6             | 0           | -3.205919               | 0.039559  | -0.571074 |
| 11            | 1             | 0           | 3.028888                | 1.585998  | -0.749550 |
| 12            | 1             | 0           | 2.773322                | 0.538511  | -2.155540 |
| 13            | 1             | 0           | 1.303857                | -2.476130 | 0.195379  |
| 14            | 1             | 0           | -3.807798               | 0.744531  | 0.010642  |

|    |    |   |           |           |           |
|----|----|---|-----------|-----------|-----------|
| 15 | 1  | 0 | -3.628238 | 0.029300  | -1.584396 |
| 16 | 1  | 0 | -1.378762 | -2.504299 | 0.653313  |
| 17 | 1  | 0 | -1.715417 | -2.598017 | -1.067687 |
| 18 | 1  | 0 | -0.998858 | 1.836897  | 0.813328  |
| 19 | 1  | 0 | -0.357475 | 2.621444  | 2.155174  |
| 20 | 8  | 0 | -0.753612 | 1.780321  | 1.896174  |
| 21 | 1  | 0 | 0.955727  | -0.680809 | 1.618599  |
| 22 | 1  | 0 | 0.628495  | 2.778090  | -1.348717 |
| 23 | 1  | 0 | -1.851524 | 2.558034  | -1.078504 |
| 24 | 8  | 0 | 0.677212  | -0.119324 | 2.458061  |
| 25 | 1  | 0 | 1.487086  | 0.053625  | 2.950827  |
| 26 | 1  | 0 | -0.075683 | 0.934977  | 2.157154  |
| 27 | 16 | 0 | 3.117385  | -0.779566 | -0.132779 |
| 28 | 6  | 0 | -3.182578 | -1.381056 | 0.050137  |
| 29 | 1  | 0 | -3.959029 | -2.030997 | -0.358970 |
| 30 | 1  | 0 | -3.357442 | -1.306256 | 1.127237  |

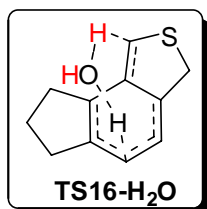

(Nimag=1) -1224.5938

| Center Number | Atomic Number | Atomic Type | Coordinates (Angstroms) |           |           |
|---------------|---------------|-------------|-------------------------|-----------|-----------|
|               |               |             | X                       | Y         | Z         |
| 1             | 6             | 0           | 0.416638                | -0.482777 | -0.367704 |
| 2             | 6             | 0           | -1.011934               | -0.515080 | -0.378874 |
| 3             | 6             | 0           | -1.680301               | 0.670646  | -0.182093 |
| 4             | 6             | 0           | -0.964012               | 1.896974  | -0.002117 |
| 5             | 6             | 0           | 0.378837                | 1.934390  | -0.530021 |
| 6             | 6             | 0           | 1.055178                | 0.769014  | -0.745282 |
| 7             | 6             | 0           | 1.284024                | -1.328711 | 0.322015  |
| 8             | 6             | 0           | 2.527203                | 0.587041  | -1.002377 |
| 9             | 6             | 0           | -1.935034               | -1.700834 | -0.230933 |
| 10            | 6             | 0           | -3.151833               | 0.417781  | 0.056348  |
| 11            | 1             | 0           | 3.120409                | 1.469306  | -0.761374 |
| 12            | 1             | 0           | 2.742687                | 0.284312  | -2.030721 |
| 13            | 1             | 0           | 1.099357                | -2.366985 | 0.568054  |
| 14            | 1             | 0           | -3.386282               | 0.546722  | 1.121640  |
| 15            | 1             | 0           | -3.796551               | 1.110116  | -0.493198 |
| 16            | 1             | 0           | -1.819453               | -2.161125 | 0.762348  |
| 17            | 1             | 0           | -1.749903               | -2.490104 | -0.965296 |

|    |    |   |           |           |           |
|----|----|---|-----------|-----------|-----------|
| 18 | 1  | 0 | -0.376234 | 1.287760  | 1.392898  |
| 19 | 1  | 0 | 0.845938  | 1.036399  | 2.584096  |
| 20 | 8  | 0 | 0.159490  | 0.560146  | 2.095811  |
| 21 | 1  | 0 | 0.629284  | -0.267135 | 1.562542  |
| 22 | 1  | 0 | 0.875511  | 2.893290  | -0.646682 |
| 23 | 1  | 0 | -1.514695 | 2.826705  | 0.095270  |
| 24 | 6  | 0 | -3.335033 | -1.055988 | -0.385370 |
| 25 | 1  | 0 | -3.629284 | -1.083661 | -1.438211 |
| 26 | 1  | 0 | -4.107718 | -1.575484 | 0.185138  |
| 27 | 16 | 0 | 3.018039  | -0.821626 | 0.123466  |

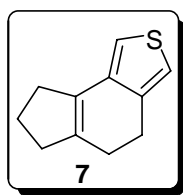

(Nimag=0)

| Center Number | Atomic Number | Atomic Type | Coordinates (Angstroms) |           |           |
|---------------|---------------|-------------|-------------------------|-----------|-----------|
|               |               |             | X                       | Y         | Z         |
| 1             | 6             | 0           | 3.190337                | -1.184128 | 0.245250  |
| 2             | 6             | 0           | 3.131558                | 0.293959  | -0.220028 |
| 3             | 6             | 0           | 1.748917                | -1.729971 | 0.073538  |
| 4             | 1             | 0           | 3.930896                | -1.770053 | -0.302845 |
| 5             | 1             | 0           | 3.466546                | -1.218688 | 1.302468  |
| 6             | 1             | 0           | 3.477273                | 0.408683  | -1.257803 |
| 7             | 1             | 0           | 3.763882                | 0.951079  | 0.387260  |
| 8             | 1             | 0           | 1.461793                | -2.412259 | 0.879909  |
| 9             | 1             | 0           | 1.635869                | -2.288940 | -0.865272 |
| 10            | 6             | 0           | 0.910936                | -0.473248 | 0.038350  |
| 11            | 6             | 0           | 1.664427                | 0.631682  | -0.117555 |
| 12            | 6             | 0           | 1.075737                | 2.002208  | -0.309811 |
| 13            | 1             | 0           | 0.989468                | 2.203968  | -1.387941 |
| 14            | 1             | 0           | 1.746812                | 2.771010  | 0.087312  |
| 15            | 6             | 0           | -0.541703               | -0.391266 | 0.042317  |
| 16            | 6             | 0           | -1.457205               | -1.404704 | -0.076226 |
| 17            | 1             | 0           | -1.275694               | -2.463972 | -0.175889 |
| 18            | 6             | 0           | -2.522806               | 0.838664  | 0.059873  |
| 19            | 1             | 0           | -3.239209               | 1.645335  | 0.109709  |
| 20            | 6             | 0           | -1.164431               | 0.908155  | 0.128139  |
| 21            | 6             | 0           | -0.309471               | 2.129456  | 0.360417  |
| 22            | 1             | 0           | -0.818672               | 3.035150  | 0.021231  |
| 23            | 1             | 0           | -0.157671               | 2.238539  | 1.442407  |
| 24            | 16            | 0           | -3.083691               | -0.801543 | -0.099133 |

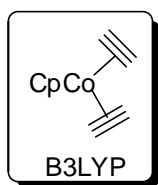

(Nimag=0)

| Center Number | Atomic Number | Atomic Type | Coordinates (Angstroms) |           |           |
|---------------|---------------|-------------|-------------------------|-----------|-----------|
|               |               |             | X                       | Y         | Z         |
| 1             | 6             | 0           | -1.216207               | -1.527503 | 0.000000  |
| 2             | 6             | 0           | -0.373240               | -1.490547 | 1.141145  |
| 3             | 6             | 0           | -0.373240               | -1.490547 | -1.141145 |
| 4             | 6             | 0           | 0.989706                | -1.511854 | 0.706093  |
| 5             | 6             | 0           | 0.989706                | -1.511854 | -0.706093 |
| 6             | 1             | 0           | -2.295049               | -1.530289 | 0.000000  |
| 7             | 1             | 0           | -0.700456               | -1.460234 | 2.169109  |
| 8             | 1             | 0           | -0.700456               | -1.460234 | -2.169109 |
| 9             | 1             | 0           | 1.857612                | -1.505710 | 1.347173  |
| 10            | 1             | 0           | 1.857612                | -1.505710 | -1.347173 |
| 11            | 6             | 0           | 0.624316                | 1.573204  | 1.412475  |
| 12            | 6             | 0           | 0.624316                | 1.573204  | -1.412475 |
| 13            | 6             | 0           | -0.618710               | 1.567844  | 1.420899  |
| 14            | 6             | 0           | -0.618710               | 1.567844  | -1.420899 |
| 15            | 27            | 0           | -0.007577               | 0.280061  | 0.000000  |
| 16            | 1             | 0           | 1.611573                | 1.857941  | 1.713566  |
| 17            | 1             | 0           | 1.611573                | 1.857941  | -1.713566 |
| 18            | 1             | 0           | -1.602734               | 1.842945  | 1.741538  |
| 19            | 1             | 0           | -1.602734               | 1.842945  | -1.741538 |

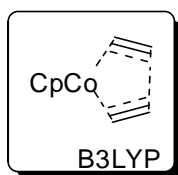

(Nimag=1) -451.7170

| Center Number | Atomic Number | Atomic Type | Coordinates (Angstroms) |          |           |
|---------------|---------------|-------------|-------------------------|----------|-----------|
|               |               |             | X                       | Y        | Z         |
| 1             | 6             | 0           | 0.484261                | 1.926657 | 0.987941  |
| 2             | 6             | 0           | 0.484261                | 1.926657 | -0.987941 |
| 3             | 6             | 0           | -0.570761               | 1.403069 | 1.475563  |
| 4             | 6             | 0           | -0.570761               | 1.403069 | -1.475563 |
| 5             | 1             | 0           | 1.342360                | 2.544010 | 1.198704  |

|    |    |   |           |           |           |
|----|----|---|-----------|-----------|-----------|
| 6  | 1  | 0 | 1.342360  | 2.544010  | -1.198704 |
| 7  | 1  | 0 | -1.229657 | 1.381873  | 2.323948  |
| 8  | 1  | 0 | -1.229657 | 1.381873  | -2.323948 |
| 9  | 27 | 0 | -0.089954 | 0.243187  | 0.000000  |
| 10 | 6  | 0 | 0.471900  | -1.540425 | 1.144476  |
| 11 | 6  | 0 | 0.471900  | -1.540425 | -1.144476 |
| 12 | 6  | 0 | -0.891814 | -1.572146 | 0.708979  |
| 13 | 6  | 0 | -0.891814 | -1.572146 | -0.708979 |
| 14 | 6  | 0 | 1.302692  | -1.554068 | 0.000000  |
| 15 | 1  | 0 | 0.804352  | -1.507206 | 2.170653  |
| 16 | 1  | 0 | 0.804352  | -1.507206 | -2.170653 |
| 17 | 1  | 0 | -1.762836 | -1.592432 | 1.345078  |
| 18 | 1  | 0 | -1.762836 | -1.592432 | -1.345078 |
| 19 | 1  | 0 | 2.381125  | -1.499979 | 0.000000  |

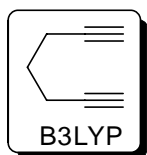

(Nimag=0)

| Center Number | Atomic Number | Atomic Type | Coordinates (Angstroms) |           |           |
|---------------|---------------|-------------|-------------------------|-----------|-----------|
|               |               |             | X                       | Y         | Z         |
| 1             | 6             | 0           | 1.669495                | 0.433370  | 0.075497  |
| 2             | 6             | 0           | 2.011677                | 1.578117  | -0.057699 |
| 3             | 1             | 0           | 2.290195                | 2.596791  | -0.171952 |
| 4             | 6             | 0           | 1.306919                | -0.973692 | 0.225778  |
| 5             | 6             | 0           | 0.000026                | -1.412832 | -0.469118 |
| 6             | 1             | 0           | 1.248117                | -1.217427 | 1.293693  |
| 7             | 1             | 0           | 2.128006                | -1.578282 | -0.175972 |
| 8             | 6             | 0           | -1.306885               | -0.973719 | 0.225770  |
| 9             | 1             | 0           | 0.000030                | -1.070738 | -1.507039 |
| 10            | 1             | 0           | 0.000038                | -2.507129 | -0.492659 |
| 11            | 1             | 0           | -2.127955               | -1.578339 | -0.175967 |
| 12            | 1             | 0           | -1.248075               | -1.217434 | 1.293689  |
| 13            | 6             | 0           | -1.669508               | 0.433329  | 0.075485  |
| 14            | 6             | 0           | -2.011734               | 1.578065  | -0.057692 |
| 15            | 1             | 0           | -2.290294               | 2.596729  | -0.171919 |

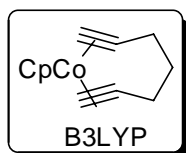

(Nimag=0)

| Center<br>Number | Atomic<br>Number | Atomic<br>Type | Coordinates (Angstroms) |           |           |
|------------------|------------------|----------------|-------------------------|-----------|-----------|
|                  |                  |                | X                       | Y         | Z         |
| 1                | 6                | 0              | -2.583734               | 0.000512  | -0.495373 |
| 2                | 6                | 0              | -2.155863               | 1.141797  | 0.235024  |
| 3                | 6                | 0              | -2.156427               | -1.141446 | 0.234242  |
| 4                | 6                | 0              | -1.534548               | 0.705664  | 1.446384  |
| 5                | 6                | 0              | -1.534849               | -0.706392 | 1.445893  |
| 6                | 1                | 0              | -3.097414               | 0.000952  | -1.443875 |
| 7                | 1                | 0              | -2.287639               | 2.170303  | -0.064685 |
| 8                | 1                | 0              | -2.288717               | -2.169691 | -0.066136 |
| 9                | 1                | 0              | -1.121852               | 1.347625  | 2.209704  |
| 10               | 1                | 0              | -1.122444               | -1.349055 | 2.208779  |
| 11               | 6                | 0              | 1.112916                | 1.297494  | -0.357052 |
| 12               | 6                | 0              | 1.112960                | -1.297495 | -0.356988 |
| 13               | 6                | 0              | 0.409325                | 1.499292  | -1.364561 |
| 14               | 6                | 0              | 0.409409                | -1.499374 | -1.364517 |
| 15               | 27               | 0              | -0.433004               | -0.000040 | -0.315063 |
| 16               | 1                | 0              | 0.110354                | 1.992624  | -2.266575 |
| 17               | 1                | 0              | 0.110520                | -1.992715 | -2.266554 |
| 18               | 6                | 0              | 2.266573                | 1.293339  | 0.558906  |
| 19               | 1                | 0              | 2.907735                | 2.158378  | 0.351688  |
| 20               | 1                | 0              | 1.918253                | 1.393134  | 1.593029  |
| 21               | 6                | 0              | 2.266622                | -1.293293 | 0.558961  |
| 22               | 1                | 0              | 2.907806                | -2.158318 | 0.351755  |
| 23               | 1                | 0              | 1.918318                | -1.393077 | 1.593088  |
| 24               | 6                | 0              | 3.098627                | 0.000037  | 0.412219  |
| 25               | 1                | 0              | 3.573335                | 0.000022  | -0.573135 |
| 26               | 1                | 0              | 3.896782                | 0.000091  | 1.160778  |

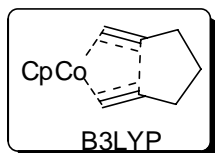

(Nimag=1)

| Center<br>Number | Atomic<br>Number | Atomic<br>Type | Coordinates (Angstroms) |           |           |
|------------------|------------------|----------------|-------------------------|-----------|-----------|
|                  |                  |                | X                       | Y         | Z         |
| 1                | 6                | 0              | 1.291343                | 0.985469  | -0.320297 |
| 2                | 6                | 0              | 1.291340                | -0.985417 | -0.320347 |
| 3                | 6                | 0              | 0.405816                | 1.468549  | -1.106835 |
| 4                | 6                | 0              | 0.405747                | -1.468365 | -1.106968 |

|    |    |   |           |           |           |
|----|----|---|-----------|-----------|-----------|
| 5  | 1  | 0 | 0.166887  | 2.348170  | -1.678687 |
| 6  | 1  | 0 | 0.166774  | -2.347939 | -1.678873 |
| 7  | 27 | 0 | -0.537425 | 0.000052  | -0.289070 |
| 8  | 6  | 0 | -2.035326 | 1.145073  | 0.832941  |
| 9  | 6  | 0 | -2.036053 | -1.145925 | 0.830687  |
| 10 | 6  | 0 | -2.511992 | 0.710077  | -0.445126 |
| 11 | 6  | 0 | -2.512457 | -0.708177 | -0.446607 |
| 12 | 6  | 0 | -1.773261 | -0.001292 | 1.619870  |
| 13 | 1  | 0 | -1.895688 | 2.170957  | 1.137504  |
| 14 | 1  | 0 | -1.897044 | -2.172491 | 1.133231  |
| 15 | 1  | 0 | -2.814433 | 1.346847  | -1.261689 |
| 16 | 1  | 0 | -2.815334 | -1.343121 | -1.264428 |
| 17 | 1  | 0 | -1.373172 | -0.002420 | 2.623030  |
| 18 | 6  | 0 | 2.534234  | 1.230745  | 0.469620  |
| 19 | 1  | 0 | 3.022617  | 2.138209  | 0.103766  |
| 20 | 1  | 0 | 2.262675  | 1.407393  | 1.518229  |
| 21 | 6  | 0 | 2.534191  | -1.230844 | 0.469548  |
| 22 | 1  | 0 | 3.022565  | -2.138282 | 0.103618  |
| 23 | 1  | 0 | 2.262601  | -1.407598 | 1.518132  |
| 24 | 6  | 0 | 3.446187  | -0.000059 | 0.362345  |
| 25 | 1  | 0 | 4.222356  | -0.000103 | 1.131631  |
| 26 | 1  | 0 | 3.941053  | -0.000027 | -0.613568 |

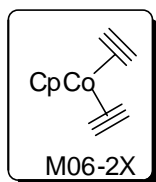

(Nimag=0)

| Center Number | Atomic Number | Atomic Type | Coordinates (Angstroms) |           |           |
|---------------|---------------|-------------|-------------------------|-----------|-----------|
|               |               |             | X                       | Y         | Z         |
| 1             | 6             | 0           | -1.211291               | -1.592032 | 0.000000  |
| 2             | 6             | 0           | -0.371126               | -1.546685 | 1.139635  |
| 3             | 6             | 0           | -0.371126               | -1.546685 | -1.139635 |
| 4             | 6             | 0           | 0.985005                | -1.563914 | 0.706076  |
| 5             | 6             | 0           | 0.985005                | -1.563914 | -0.706076 |
| 6             | 1             | 0           | -2.290217               | -1.609561 | 0.000000  |
| 7             | 1             | 0           | -0.699409               | -1.531002 | 2.168262  |
| 8             | 1             | 0           | -0.699409               | -1.531002 | -2.168262 |
| 9             | 1             | 0           | 1.853936                | -1.564028 | 1.346651  |
| 10            | 1             | 0           | 1.853936                | -1.564028 | -1.346651 |
| 11            | 6             | 0           | 0.612809                | 1.650272  | 1.491488  |
| 12            | 6             | 0           | 0.612809                | 1.650272  | -1.491488 |

|    |    |   |           |          |           |
|----|----|---|-----------|----------|-----------|
| 13 | 6  | 0 | -0.609246 | 1.653454 | 1.493937  |
| 14 | 6  | 0 | -0.609246 | 1.653454 | -1.493937 |
| 15 | 27 | 0 | -0.006331 | 0.286539 | 0.000000  |
| 16 | 1  | 0 | 1.647123  | 1.821507 | 1.693691  |
| 17 | 1  | 0 | 1.647123  | 1.821507 | -1.693691 |
| 18 | 1  | 0 | -1.641854 | 1.827369 | 1.702850  |
| 19 | 1  | 0 | -1.641854 | 1.827369 | -1.702850 |

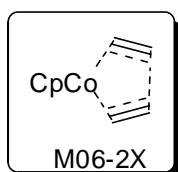

(Nimag=1) -511.5765

| Center Number | Atomic Number | Atomic Type | Coordinates (Angstroms) |           |           |
|---------------|---------------|-------------|-------------------------|-----------|-----------|
|               |               |             | X                       | Y         | Z         |
| 1             | 6             | 0           | 0.443109                | 1.998451  | 0.977247  |
| 2             | 6             | 0           | 0.443109                | 1.998451  | -0.977247 |
| 3             | 6             | 0           | -0.540638               | 1.403745  | 1.512129  |
| 4             | 6             | 0           | -0.540638               | 1.403745  | -1.512129 |
| 5             | 1             | 0           | 1.248168                | 2.694441  | 1.145431  |
| 6             | 1             | 0           | 1.248168                | 2.694441  | -1.145431 |
| 7             | 1             | 0           | -1.136863               | 1.328260  | 2.402060  |
| 8             | 1             | 0           | -1.136863               | 1.328260  | -2.402060 |
| 9             | 27            | 0           | -0.093876               | 0.241912  | 0.000000  |
| 10            | 6             | 0           | 0.477027                | -1.560973 | 1.141388  |
| 11            | 6             | 0           | 0.477027                | -1.560973 | -1.141388 |
| 12            | 6             | 0           | -0.881728               | -1.614253 | 0.706231  |
| 13            | 6             | 0           | -0.881728               | -1.614253 | -0.706231 |
| 14            | 6             | 0           | 1.307169                | -1.578031 | 0.000000  |
| 15            | 1             | 0           | 0.808382                | -1.528559 | 2.168045  |
| 16            | 1             | 0           | 0.808382                | -1.528559 | -2.168045 |
| 17            | 1             | 0           | -1.753002               | -1.628843 | 1.342383  |
| 18            | 1             | 0           | -1.753002               | -1.628843 | -1.342383 |
| 19            | 1             | 0           | 2.385021                | -1.517681 | 0.000000  |

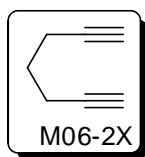

(Nimag=0)

| Center | Atomic | Atomic | Coordinates (Angstroms) |  |  |
|--------|--------|--------|-------------------------|--|--|
|--------|--------|--------|-------------------------|--|--|



| Number | Number | Type | X         | Y         | Z         |
|--------|--------|------|-----------|-----------|-----------|
| 1      | 6      | 0    | 1.576337  | 0.531979  | 0.068617  |
| 2      | 6      | 0    | 1.757614  | 1.715656  | -0.003259 |
| 3      | 1      | 0    | 1.898697  | 2.767889  | -0.063802 |
| 4      | 6      | 0    | 1.389353  | -0.917209 | 0.146810  |
| 5      | 6      | 0    | 0.080237  | -1.432147 | -0.468388 |
| 6      | 1      | 0    | 1.442492  | -1.224078 | 1.196789  |
| 7      | 1      | 0    | 2.231555  | -1.396718 | -0.360295 |
| 8      | 6      | 0    | -1.187202 | -1.036799 | 0.306842  |
| 9      | 1      | 0    | -0.001663 | -1.091680 | -1.502859 |
| 10     | 1      | 0    | 0.135225  | -2.523677 | -0.485934 |
| 11     | 1      | 0    | -2.004341 | -1.702206 | 0.014207  |
| 12     | 1      | 0    | -1.026814 | -1.193601 | 1.378716  |
| 13     | 6      | 0    | -1.633226 | 0.339395  | 0.084781  |
| 14     | 6      | 0    | -2.033891 | 1.452183  | -0.116482 |
| 15     | 1      | 0    | -2.370491 | 2.445725  | -0.290344 |

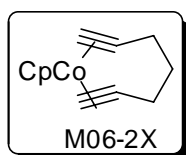

(Nimag=0)

| Center Number | Atomic Number | Atomic Type | Coordinates (Angstroms) |           |           |
|---------------|---------------|-------------|-------------------------|-----------|-----------|
|               |               |             | X                       | Y         | Z         |
| 1             | 6             | 0           | -2.639093               | 0.000022  | -0.456817 |
| 2             | 6             | 0           | -2.191535               | 1.139909  | 0.256355  |
| 3             | 6             | 0           | -2.191390               | -1.140067 | 0.255953  |
| 4             | 6             | 0           | -1.544795               | 0.705325  | 1.448126  |
| 5             | 6             | 0           | -1.544706               | -0.705812 | 1.447868  |
| 6             | 1             | 0           | -3.185561               | 0.000159  | -1.387200 |
| 7             | 1             | 0           | -2.343429               | 2.168951  | -0.033558 |
| 8             | 1             | 0           | -2.343129               | -2.169028 | -0.034330 |
| 9             | 1             | 0           | -1.123950               | 1.348115  | 2.207110  |
| 10            | 1             | 0           | -1.123775               | -1.348831 | 2.206610  |
| 11            | 6             | 0           | 1.191601                | 1.379496  | -0.427506 |
| 12            | 6             | 0           | 1.191491                | -1.379398 | -0.427773 |
| 13            | 6             | 0           | 0.513721                | 1.588677  | -1.423834 |
| 14            | 6             | 0           | 0.513687                | -1.588259 | -1.424175 |
| 15            | 27            | 0           | -0.416426               | 0.000133  | -0.353717 |
| 16            | 1             | 0           | 0.083629                | 1.969447  | -2.322828 |
| 17            | 1             | 0           | 0.083620                | -1.968680 | -2.323327 |

|    |   |   |          |           |           |
|----|---|---|----------|-----------|-----------|
| 18 | 6 | 0 | 2.213811 | 1.286582  | 0.625965  |
| 19 | 1 | 0 | 2.877219 | 2.153545  | 0.554021  |
| 20 | 1 | 0 | 1.722150 | 1.327331  | 1.602910  |
| 21 | 6 | 0 | 2.213670 | -1.286796 | 0.625744  |
| 22 | 1 | 0 | 2.876991 | -2.153816 | 0.553665  |
| 23 | 1 | 0 | 1.721977 | -1.327665 | 1.602667  |
| 24 | 6 | 0 | 3.044983 | -0.000142 | 0.511338  |
| 25 | 1 | 0 | 3.571548 | -0.000087 | -0.446273 |
| 26 | 1 | 0 | 3.797535 | -0.000257 | 1.303430  |

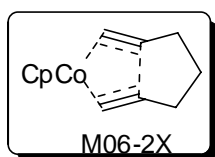

(Nimag=1) -437.7716

| Center Number | Atomic Number | Atomic Type | Coordinates (Angstroms) |           |           |
|---------------|---------------|-------------|-------------------------|-----------|-----------|
|               |               |             | X                       | Y         | Z         |
| 1             | 6             | 0           | 1.330859                | 0.976525  | -0.284626 |
| 2             | 6             | 0           | 1.330184                | -0.976492 | -0.286183 |
| 3             | 6             | 0           | 0.440761                | 1.497090  | -1.032261 |
| 4             | 6             | 0           | 0.440698                | -1.495766 | -1.035807 |
| 5             | 1             | 0           | 0.201833                | 2.408356  | -1.550807 |
| 6             | 1             | 0           | 0.203193                | -2.407372 | -1.554536 |
| 7             | 27            | 0           | -0.544213               | -0.000120 | -0.276643 |
| 8             | 6             | 0           | -2.068014               | 1.099188  | 0.900775  |
| 9             | 6             | 0           | -2.145458               | -1.173644 | 0.684286  |
| 10            | 6             | 0           | -2.525877               | 0.801721  | -0.416425 |
| 11            | 6             | 0           | -2.573519               | -0.604089 | -0.553324 |
| 12            | 6             | 0           | -1.877963               | -0.121481 | 1.585859  |
| 13            | 1             | 0           | -1.906592               | 2.087477  | 1.303284  |
| 14            | 1             | 0           | -2.051390               | -2.228402 | 0.892522  |
| 15            | 1             | 0           | -2.764753               | 1.522570  | -1.182791 |
| 16            | 1             | 0           | -2.860007               | -1.149452 | -1.438828 |
| 17            | 1             | 0           | -1.511209               | -0.230892 | 2.595456  |
| 18            | 6             | 0           | 2.597899                | 1.214552  | 0.471517  |
| 19            | 1             | 0           | 3.056381                | 2.137907  | 0.113349  |
| 20            | 1             | 0           | 2.352087                | 1.350828  | 1.530833  |
| 21            | 6             | 0           | 2.596859                | -1.215715 | 0.470347  |
| 22            | 1             | 0           | 3.054857                | -2.139166 | 0.111816  |
| 23            | 1             | 0           | 2.350515                | -1.352392 | 1.529517  |
| 24            | 6             | 0           | 3.505811                | -0.000903 | 0.298567  |
| 25            | 1             | 0           | 4.329571                | -0.001541 | 1.013869  |

26 1 0 3.925832 -0.000599 -0.710678

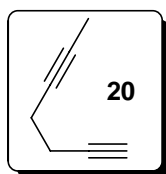

(Nimag=0)

| Center Number | Atomic Number | Atomic Type | Coordinates (Angstroms) |           |           |
|---------------|---------------|-------------|-------------------------|-----------|-----------|
|               |               |             | X                       | Y         | Z         |
| 1             | 6             | 0           | -1.568091               | -0.812580 | 0.488094  |
| 2             | 6             | 0           | -0.398409               | -1.348932 | -0.378657 |
| 3             | 1             | 0           | -1.267264               | -0.820363 | 1.540553  |
| 4             | 1             | 0           | -2.412402               | -1.504357 | 0.394600  |
| 5             | 1             | 0           | -0.242950               | -2.402188 | -0.119874 |
| 6             | 1             | 0           | -0.697119               | -1.325401 | -1.431804 |
| 7             | 6             | 0           | 0.851712                | -0.615570 | -0.202488 |
| 8             | 6             | 0           | 1.879441                | -0.008184 | -0.044248 |
| 9             | 6             | 0           | 3.119661                | 0.736292  | 0.139249  |
| 10            | 1             | 0           | 2.934033                | 1.685845  | 0.649725  |
| 11            | 1             | 0           | 3.589633                | 0.961384  | -0.822655 |
| 12            | 1             | 0           | 3.838278                | 0.169282  | 0.738286  |
| 13            | 6             | 0           | -2.009948               | 0.528086  | 0.118606  |
| 14            | 6             | 0           | -2.380863               | 1.626772  | -0.199372 |
| 15            | 1             | 0           | -2.703229               | 2.600503  | -0.475943 |

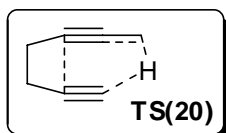

(Nimag=1) -1163.1529

| Center Number | Atomic Number | Atomic Type | Coordinates (Angstroms) |           |           |
|---------------|---------------|-------------|-------------------------|-----------|-----------|
|               |               |             | X                       | Y         | Z         |
| 1             | 6             | 0           | -0.433605               | 0.959248  | -0.000222 |
| 2             | 6             | 0           | 0.544754                | 1.744367  | 0.000195  |
| 3             | 1             | 0           | 0.857365                | 2.770642  | 0.000534  |
| 4             | 6             | 0           | -1.855023               | 0.475036  | -0.000178 |
| 5             | 1             | 0           | -2.398762               | 0.819070  | -0.884242 |
| 6             | 1             | 0           | -2.399279               | 0.819994  | 0.883202  |
| 7             | 6             | 0           | -1.571516               | -1.056679 | 0.000453  |
| 8             | 1             | 0           | -1.949019               | -1.574901 | 0.885866  |
| 9             | 1             | 0           | -1.950490               | -1.575983 | -0.883694 |

|    |   |   |           |           |           |
|----|---|---|-----------|-----------|-----------|
| 10 | 6 | 0 | -0.094700 | -0.909523 | -0.000560 |
| 11 | 6 | 0 | 1.140882  | -1.095349 | -0.000123 |
| 12 | 6 | 0 | 2.315635  | -0.343156 | 0.000076  |
| 13 | 1 | 0 | 1.715751  | 0.832535  | 0.000026  |
| 14 | 1 | 0 | 2.923166  | -0.367554 | -0.905646 |
| 15 | 1 | 0 | 2.922711  | -0.367473 | 0.906108  |

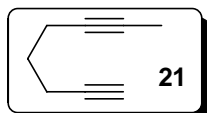

(Nimag=0)

| Center Number | Atomic Number | Atomic Type | Coordinates (Angstroms) |           |           |
|---------------|---------------|-------------|-------------------------|-----------|-----------|
|               |               |             | X                       | Y         | Z         |
| 1             | 6             | 0           | 1.428906                | 1.357214  | 0.083334  |
| 2             | 6             | 0           | 0.928579                | 2.435086  | -0.101318 |
| 3             | 1             | 0           | 0.468623                | 3.379015  | -0.261253 |
| 4             | 6             | 0           | 2.100047                | 0.076306  | 0.292816  |
| 5             | 6             | 0           | 1.510416                | -1.128069 | -0.475201 |
| 6             | 1             | 0           | 2.118029                | -0.149984 | 1.365956  |
| 7             | 1             | 0           | 3.147257                | 0.197025  | -0.006897 |
| 8             | 6             | 0           | 0.247003                | -1.758462 | 0.146673  |
| 9             | 1             | 0           | 1.309930                | -0.840242 | -1.510394 |
| 10            | 1             | 0           | 2.280057                | -1.906246 | -0.502154 |
| 11            | 1             | 0           | 0.054147                | -2.708157 | -0.366178 |
| 12            | 1             | 0           | 0.458048                | -2.020108 | 1.191464  |
| 13            | 6             | 0           | -0.963487               | -0.941778 | 0.088487  |
| 14            | 6             | 0           | -1.972617               | -0.287292 | 0.033449  |
| 15            | 6             | 0           | -3.171200               | 0.539311  | -0.030005 |
| 16            | 1             | 0           | -2.908191               | 1.598430  | -0.112860 |
| 17            | 1             | 0           | -3.784709               | 0.417014  | 0.867564  |
| 18            | 1             | 0           | -3.789077               | 0.279358  | -0.894654 |

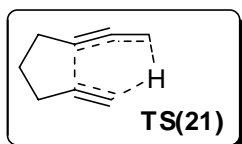

(Nimag=1) -971.3455

| Center Number | Atomic Number | Atomic Type | Coordinates (Angstroms) |          |           |
|---------------|---------------|-------------|-------------------------|----------|-----------|
|               |               |             | X                       | Y        | Z         |
| 1             | 6             | 0           | -0.057638               | 1.121445 | -0.065212 |
| 2             | 6             | 0           | 1.008742                | 1.766632 | 0.027172  |

|    |   |   |           |           |           |
|----|---|---|-----------|-----------|-----------|
| 3  | 1 | 0 | 1.468832  | 2.732079  | 0.099744  |
| 4  | 6 | 0 | -1.540656 | 1.071198  | -0.183761 |
| 5  | 6 | 0 | -2.097334 | -0.242454 | 0.381367  |
| 6  | 1 | 0 | -1.801693 | 1.152358  | -1.246409 |
| 7  | 1 | 0 | -1.975750 | 1.939662  | 0.319346  |
| 8  | 6 | 0 | -1.228841 | -1.384805 | -0.174331 |
| 9  | 1 | 0 | -2.024955 | -0.229098 | 1.473039  |
| 10 | 1 | 0 | -3.149758 | -0.375587 | 0.118318  |
| 11 | 1 | 0 | -1.383297 | -2.314588 | 0.379168  |
| 12 | 1 | 0 | -1.496416 | -1.581040 | -1.219878 |
| 13 | 6 | 0 | 0.180788  | -0.958225 | -0.096036 |
| 14 | 6 | 0 | 1.411158  | -1.118228 | -0.010800 |
| 15 | 6 | 0 | 2.623451  | -0.433259 | 0.082262  |
| 16 | 1 | 0 | 2.109395  | 0.738568  | 0.069767  |
| 17 | 1 | 0 | 3.288236  | -0.482635 | -0.781586 |
| 18 | 1 | 0 | 3.167388  | -0.513547 | 1.024527  |

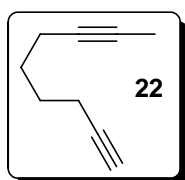

(Nimag=0)

| Center Number | Atomic Number | Atomic Type | Coordinates (Angstroms) |           |           |
|---------------|---------------|-------------|-------------------------|-----------|-----------|
|               |               |             | X                       | Y         | Z         |
| 1             | 6             | 0           | 1.146846                | 1.648687  | 0.051079  |
| 2             | 6             | 0           | 0.898145                | 2.461222  | 0.902614  |
| 3             | 1             | 0           | 0.660558                | 3.173506  | 1.653957  |
| 4             | 6             | 0           | 1.501538                | 0.676601  | -0.980331 |
| 5             | 1             | 0           | 2.248855                | 1.141949  | -1.632616 |
| 6             | 1             | 0           | 0.625730                | 0.476530  | -1.606778 |
| 7             | 6             | 0           | -0.005850               | -1.411405 | 0.975165  |
| 8             | 1             | 0           | -0.328487               | -2.341333 | 1.457147  |
| 9             | 1             | 0           | 0.437552                | -0.795562 | 1.765937  |
| 10            | 6             | 0           | -1.190924               | -0.741611 | 0.440053  |
| 11            | 6             | 0           | -2.177836               | -0.217660 | -0.010141 |
| 12            | 6             | 0           | -3.363223               | 0.443636  | -0.543823 |
| 13            | 1             | 0           | -3.249522               | 1.531707  | -0.521987 |
| 14            | 1             | 0           | -4.253765               | 0.189115  | 0.038710  |
| 15            | 6             | 0           | 2.079519                | -0.654705 | -0.434517 |
| 16            | 1             | 0           | 2.701479                | -0.432692 | 0.438606  |
| 17            | 1             | 0           | 2.754189                | -1.061449 | -1.195198 |
| 18            | 6             | 0           | 1.069423                | -1.757758 | -0.084740 |

|    |   |   |           |           |           |
|----|---|---|-----------|-----------|-----------|
| 19 | 1 | 0 | 0.564500  | -2.097938 | -0.994892 |
| 20 | 1 | 0 | 1.643345  | -2.614049 | 0.285645  |
| 21 | 1 | 0 | -3.550252 | 0.148175  | -1.580677 |

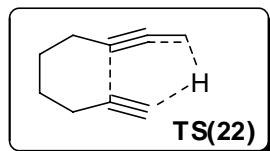

(Nimag=1) -1067.4769

| Center Number | Atomic Number | Atomic Type | Coordinates (Angstroms) |           |           |
|---------------|---------------|-------------|-------------------------|-----------|-----------|
|               |               |             | X                       | Y         | Z         |
| 1             | 6             | 0           | 0.312841                | 1.240709  | -0.000675 |
| 2             | 6             | 0           | 1.455432                | 1.742585  | -0.075998 |
| 3             | 1             | 0           | 2.001314                | 2.664896  | -0.137003 |
| 4             | 6             | 0           | -1.133425               | 1.521703  | 0.201450  |
| 5             | 1             | 0           | -1.329641               | 2.513979  | -0.222299 |
| 6             | 1             | 0           | -1.296032               | 1.614712  | 1.282966  |
| 7             | 6             | 0           | -0.878766               | -1.669838 | -0.153682 |
| 8             | 1             | 0           | -0.855858               | -2.629407 | 0.373647  |
| 9             | 1             | 0           | -1.012823               | -1.905632 | -1.217316 |
| 10            | 6             | 0           | 0.440642                | -1.017708 | 0.004027  |
| 11            | 6             | 0           | 1.676374                | -1.137202 | 0.050771  |
| 12            | 6             | 0           | 2.920251                | -0.520201 | 0.022174  |
| 13            | 1             | 0           | 2.437223                | 0.689304  | -0.039983 |
| 14            | 1             | 0           | 3.504512                | -0.630426 | -0.892100 |
| 15            | 6             | 0           | -2.162300               | 0.526148  | -0.350643 |
| 16            | 1             | 0           | -2.040788               | 0.424455  | -1.435612 |
| 17            | 1             | 0           | -3.155806               | 0.956484  | -0.187628 |
| 18            | 6             | 0           | -2.086844               | -0.849989 | 0.313317  |
| 19            | 1             | 0           | -2.058474               | -0.729458 | 1.402786  |
| 20            | 1             | 0           | -2.992065               | -1.421621 | 0.085119  |
| 21            | 1             | 0           | 3.533214                | -0.564521 | 0.922979  |

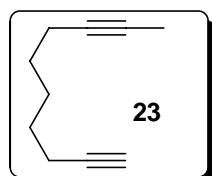

(Nimag=0)

| Center Number | Atomic Number | Atomic Type | Coordinates (Angstroms) |   |   |
|---------------|---------------|-------------|-------------------------|---|---|
|               |               |             | X                       | Y | Z |

|    |   |   |           |           |           |
|----|---|---|-----------|-----------|-----------|
| 1  | 6 | 0 | 0.512197  | -1.510204 | -0.596404 |
| 2  | 1 | 0 | 1.146441  | -2.268308 | -1.065324 |
| 3  | 1 | 0 | 0.388804  | -0.711923 | -1.333799 |
| 4  | 6 | 0 | -2.216936 | -0.054234 | 0.617970  |
| 5  | 1 | 0 | -3.270245 | 0.244623  | 0.673186  |
| 6  | 1 | 0 | -1.952312 | -0.394628 | 1.627182  |
| 7  | 6 | 0 | -1.429290 | 1.130729  | 0.276057  |
| 8  | 6 | 0 | -0.801727 | 2.119094  | -0.009343 |
| 9  | 6 | 0 | -0.037535 | 3.315251  | -0.346431 |
| 10 | 1 | 0 | 0.717641  | 3.528940  | 0.415897  |
| 11 | 1 | 0 | -0.690205 | 4.189899  | -0.427274 |
| 12 | 6 | 0 | -0.856724 | -2.136194 | -0.255258 |
| 13 | 1 | 0 | -0.819971 | -2.567444 | 0.754078  |
| 14 | 1 | 0 | -1.019653 | -2.984899 | -0.928051 |
| 15 | 6 | 0 | -2.100292 | -1.237441 | -0.372955 |
| 16 | 1 | 0 | -2.177852 | -0.850076 | -1.394471 |
| 17 | 1 | 0 | -2.978602 | -1.873933 | -0.218482 |
| 18 | 1 | 0 | 0.481914  | 3.195128  | -1.301901 |
| 19 | 6 | 0 | 1.275381  | -0.951387 | 0.624610  |
| 20 | 1 | 0 | 1.415804  | -1.752315 | 1.360755  |
| 21 | 1 | 0 | 0.683733  | -0.171739 | 1.113490  |
| 22 | 6 | 0 | 2.580656  | -0.397955 | 0.272825  |
| 23 | 6 | 0 | 3.653139  | 0.050458  | -0.039085 |
| 24 | 1 | 0 | 4.601283  | 0.447972  | -0.307193 |

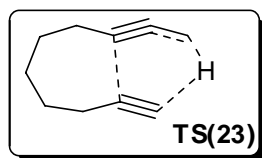

(Nimag=1) -1127.0013

| Center Number | Atomic Number | Atomic Type | Coordinates (Angstroms) |           |           |
|---------------|---------------|-------------|-------------------------|-----------|-----------|
|               |               |             | X                       | Y         | Z         |
| 1             | 6             | 0           | -0.668904               | 1.311372  | -0.182517 |
| 2             | 6             | 0           | -1.860804               | 1.693682  | -0.193731 |
| 3             | 1             | 0           | -2.457249               | 2.586213  | -0.260790 |
| 4             | 6             | 0           | 0.757757                | 1.705771  | -0.270670 |
| 5             | 1             | 0           | 0.780975                | 2.791750  | -0.119693 |
| 6             | 1             | 0           | 1.105135                | 1.541865  | -1.297122 |
| 7             | 6             | 0           | 0.640514                | -1.780260 | 0.143080  |
| 8             | 1             | 0           | 0.454782                | -2.794147 | -0.225996 |
| 9             | 1             | 0           | 0.950552                | -1.893330 | 1.189688  |
| 10            | 6             | 0           | -0.661619               | -1.069173 | 0.096183  |

|    |   |   |           |           |           |
|----|---|---|-----------|-----------|-----------|
| 11 | 6 | 0 | -1.897722 | -1.173882 | 0.137396  |
| 12 | 6 | 0 | -3.169326 | -0.633842 | 0.115627  |
| 13 | 1 | 0 | -2.719827 | 0.633032  | -0.052004 |
| 14 | 1 | 0 | -3.729551 | -0.612165 | 1.050161  |
| 15 | 6 | 0 | 1.728873  | 1.029880  | 0.722381  |
| 16 | 1 | 0 | 1.158411  | 0.642184  | 1.570472  |
| 17 | 1 | 0 | 2.402295  | 1.788661  | 1.132850  |
| 18 | 6 | 0 | 1.795445  | -1.159115 | -0.662924 |
| 19 | 1 | 0 | 1.400018  | -0.760040 | -1.601882 |
| 20 | 1 | 0 | 2.491453  | -1.956238 | -0.943381 |
| 21 | 1 | 0 | -3.790536 | -0.823385 | -0.759434 |
| 22 | 6 | 0 | 2.581714  | -0.082496 | 0.097276  |
| 23 | 1 | 0 | 3.166017  | -0.561735 | 0.892085  |
| 24 | 1 | 0 | 3.311960  | 0.365708  | -0.587550 |

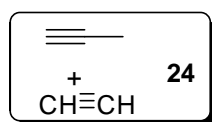

(Nimag=0)

| Center Number | Atomic Number | Atomic Type | Coordinates (Angstroms) |           |           |
|---------------|---------------|-------------|-------------------------|-----------|-----------|
|               |               |             | X                       | Y         | Z         |
| 1             | 6             | 0           | -1.420739               | -0.000108 | 0.000001  |
| 2             | 6             | 0           | -0.218528               | 0.000018  | -0.000001 |
| 3             | 6             | 0           | 1.238443                | 0.000039  | 0.000000  |
| 4             | 1             | 0           | 1.629395                | 1.021244  | -0.003286 |
| 5             | 1             | 0           | 1.629293                | -0.513533 | -0.882771 |
| 6             | 1             | 0           | 1.629292                | -0.507841 | 0.886059  |
| 7             | 1             | 0           | -2.483033               | 0.000437  | 0.000000  |

| Center Number | Atomic Number | Atomic Type | Coordinates (Angstroms) |          |           |
|---------------|---------------|-------------|-------------------------|----------|-----------|
|               |               |             | X                       | Y        | Z         |
| 1             | 6             | 0           | 0.000000                | 0.000000 | -0.599706 |
| 2             | 6             | 0           | 0.000000                | 0.000000 | 0.599706  |
| 3             | 1             | 0           | 0.000000                | 0.000000 | -1.662559 |
| 4             | 1             | 0           | 0.000000                | 0.000000 | 1.662557  |

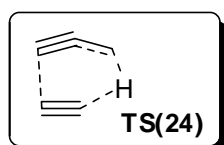

(Nimag=1) -741.7426



| Center Number | Atomic Number | Atomic Type | Coordinates (Angstroms) |           |           |
|---------------|---------------|-------------|-------------------------|-----------|-----------|
|               |               |             | X                       | Y         | Z         |
| 1             | 6             | 0           | 1.463404                | 0.283821  | 0.000147  |
| 2             | 6             | 0           | 1.382784                | -0.955906 | -0.000177 |
| 3             | 1             | 0           | 1.797581                | -1.940776 | 0.000489  |
| 4             | 6             | 0           | -0.252448               | 1.361565  | 0.000088  |
| 5             | 6             | 0           | -1.178890               | 0.528577  | -0.000092 |
| 6             | 6             | 0           | -1.407760               | -0.857760 | 0.000019  |
| 7             | 1             | 0           | -0.246892               | -1.214930 | -0.000439 |
| 8             | 1             | 0           | -1.867292               | -1.267055 | -0.901456 |
| 9             | 1             | 0           | -1.866513               | -1.266868 | 0.901990  |
| 10            | 1             | 0           | 2.117588                | 1.132379  | -0.000408 |
| 11            | 1             | 0           | 0.022990                | 2.395472  | -0.000086 |

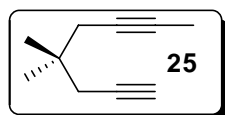

(Nimag=0)

| Center Number | Atomic Number | Atomic Type | Coordinates (Angstroms) |           |           |
|---------------|---------------|-------------|-------------------------|-----------|-----------|
|               |               |             | X                       | Y         | Z         |
| 1             | 6             | 0           | -0.179945               | 1.932492  | -0.261833 |
| 2             | 6             | 0           | 0.683015                | 2.715528  | 0.036079  |
| 3             | 1             | 0           | 1.460263                | 3.390256  | 0.298449  |
| 4             | 6             | 0           | -1.287256               | 1.053575  | -0.629837 |
| 5             | 6             | 0           | -1.363223               | -0.344389 | 0.058359  |
| 6             | 1             | 0           | -1.282056               | 0.910839  | -1.717157 |
| 7             | 1             | 0           | -2.217288               | 1.588037  | -0.401205 |
| 8             | 6             | 0           | -0.318759               | -1.334241 | -0.538671 |
| 9             | 1             | 0           | -0.538233               | -2.329320 | -0.132230 |
| 10            | 1             | 0           | -0.490858               | -1.407655 | -1.619904 |
| 11            | 6             | 0           | 1.091658                | -1.038555 | -0.300008 |
| 12            | 6             | 0           | 2.262547                | -0.829585 | -0.112410 |
| 13            | 6             | 0           | 3.669806                | -0.526554 | 0.114039  |
| 14            | 1             | 0           | 3.817232                | 0.549511  | 0.250197  |
| 15            | 1             | 0           | 4.284582                | -0.842067 | -0.734254 |
| 16            | 1             | 0           | 4.048701                | -1.032298 | 1.007156  |
| 17            | 6             | 0           | -1.184560               | -0.217250 | 1.577568  |
| 18            | 1             | 0           | -1.932666               | 0.459991  | 2.000828  |
| 19            | 1             | 0           | -1.302073               | -1.192054 | 2.060742  |
| 20            | 1             | 0           | -0.195952               | 0.170191  | 1.828661  |

|    |   |   |           |           |           |
|----|---|---|-----------|-----------|-----------|
| 21 | 6 | 0 | -2.757839 | -0.920845 | -0.252262 |
| 22 | 1 | 0 | -2.928974 | -0.996982 | -1.331092 |
| 23 | 1 | 0 | -2.870692 | -1.921180 | 0.175324  |
| 24 | 1 | 0 | -3.544656 | -0.288324 | 0.168348  |

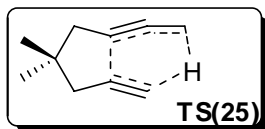

(Nimag=1) -963.3618

| Center Number | Atomic Number | Atomic Type | Coordinates (Angstroms) |           |           |
|---------------|---------------|-------------|-------------------------|-----------|-----------|
|               |               |             | X                       | Y         | Z         |
| 1             | 6             | 0           | 0.678369                | 1.152609  | -0.199566 |
| 2             | 6             | 0           | 1.773084                | 1.721020  | 0.000887  |
| 3             | 1             | 0           | 2.290005                | 2.650454  | 0.134404  |
| 4             | 6             | 0           | -0.784959               | 1.203934  | -0.458645 |
| 5             | 6             | 0           | -1.513872               | -0.066618 | 0.037178  |
| 6             | 1             | 0           | -0.935602               | 1.303230  | -1.541067 |
| 7             | 1             | 0           | -1.207797               | 2.100725  | 0.006143  |
| 8             | 6             | 0           | -0.650515               | -1.246299 | -0.480626 |
| 9             | 1             | 0           | -0.923268               | -2.180805 | 0.018870  |
| 10            | 1             | 0           | -0.833320               | -1.387373 | -1.553111 |
| 11            | 6             | 0           | 0.771841                | -0.930695 | -0.261363 |
| 12            | 6             | 0           | 1.974973                | -1.183925 | -0.073408 |
| 13            | 6             | 0           | 3.220147                | -0.590794 | 0.142629  |
| 14            | 1             | 0           | 2.795243                | 0.613664  | 0.116069  |
| 15            | 1             | 0           | 3.953956                | -0.672165 | -0.660859 |
| 16            | 1             | 0           | 3.671721                | -0.730920 | 1.125984  |
| 17            | 6             | 0           | -2.935337               | -0.138065 | -0.533466 |
| 18            | 1             | 0           | -3.440534               | -1.054239 | -0.212705 |
| 19            | 1             | 0           | -3.539303               | 0.707832  | -0.191258 |
| 20            | 1             | 0           | -2.926269               | -0.124375 | -1.627819 |
| 21            | 6             | 0           | -1.561961               | -0.082356 | 1.574705  |
| 22            | 1             | 0           | -2.127258               | 0.774917  | 1.952998  |
| 23            | 1             | 0           | -2.049943               | -0.992080 | 1.937488  |
| 24            | 1             | 0           | -0.558255               | -0.041730 | 2.004912  |

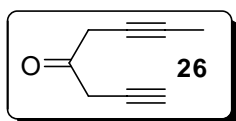

(Nimag=0)

| Center | Atomic | Atomic | Coordinates (Angstroms) |  |  |
|--------|--------|--------|-------------------------|--|--|
|--------|--------|--------|-------------------------|--|--|

| Number | Number | Type | X         | Y         | Z         |
|--------|--------|------|-----------|-----------|-----------|
| 1      | 6      | 0    | -1.785100 | 1.328895  | -0.187371 |
| 2      | 6      | 0    | -2.146338 | 2.275792  | 0.459122  |
| 3      | 1      | 0    | -2.464279 | 3.117832  | 1.024024  |
| 4      | 6      | 0    | -1.366960 | 0.164816  | -0.959044 |
| 5      | 1      | 0    | -0.476696 | 0.416294  | -1.547781 |
| 6      | 1      | 0    | -2.153588 | -0.146849 | -1.649495 |
| 7      | 6      | 0    | 0.032702  | -0.859573 | 1.015492  |
| 8      | 1      | 0    | -0.391385 | -0.172304 | 1.758159  |
| 9      | 1      | 0    | 0.173775  | -1.829544 | 1.497668  |
| 10     | 6      | 0    | 1.297988  | -0.328938 | 0.516982  |
| 11     | 6      | 0    | 2.344006  | 0.091816  | 0.093963  |
| 12     | 6      | 0    | 3.614350  | 0.604699  | -0.404798 |
| 13     | 1      | 0    | 3.715131  | 0.430979  | -1.480022 |
| 14     | 1      | 0    | 4.455723  | 0.113234  | 0.092075  |
| 15     | 1      | 0    | 3.701955  | 1.680490  | -0.228237 |
| 16     | 6      | 0    | -1.017845 | -1.053496 | -0.086411 |
| 17     | 8      | 0    | -1.549682 | -2.119276 | -0.269250 |

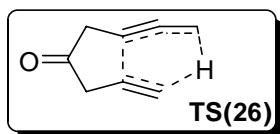

(Nimag=1) -947.5137

| Center Number | Atomic Number | Atomic Type | Coordinates (Angstroms) |           |           |
|---------------|---------------|-------------|-------------------------|-----------|-----------|
|               |               |             | X                       | Y         | Z         |
| 1             | 6             | 0           | -0.350444               | 1.156205  | 0.029506  |
| 2             | 6             | 0           | -1.456234               | 1.730203  | -0.042093 |
| 3             | 1             | 0           | -1.989537               | 2.658604  | -0.090081 |
| 4             | 6             | 0           | 1.122866                | 1.228775  | 0.119838  |
| 5             | 1             | 0           | 1.414509                | 1.637263  | 1.096163  |
| 6             | 1             | 0           | 1.530619                | 1.911923  | -0.630851 |
| 7             | 6             | 0           | 0.940453                | -1.339374 | 0.102986  |
| 8             | 1             | 0           | 1.210801                | -2.039972 | -0.692279 |
| 9             | 1             | 0           | 1.192939                | -1.829571 | 1.051503  |
| 10            | 6             | 0           | -0.473960               | -0.959428 | 0.053510  |
| 11            | 6             | 0           | -1.696659               | -1.172697 | 0.000883  |
| 12            | 6             | 0           | -2.944157               | -0.553937 | -0.071355 |
| 13            | 1             | 0           | -2.494952               | 0.638548  | -0.072388 |
| 14            | 1             | 0           | -3.589418               | -0.634619 | 0.804444  |
| 15            | 1             | 0           | -3.497886               | -0.665324 | -1.004564 |
| 16            | 6             | 0           | 1.846500                | -0.110754 | -0.020064 |

17 8 0 3.036592 -0.193851 -0.187652

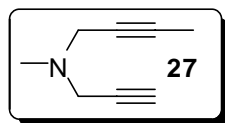

(Nimag=0)

| Center Number | Atomic Number | Atomic Type | Coordinates (Angstroms) |           |           |
|---------------|---------------|-------------|-------------------------|-----------|-----------|
|               |               |             | X                       | Y         | Z         |
| 1             | 6             | 0           | -1.208846               | 1.561272  | -0.212045 |
| 2             | 6             | 0           | -0.701173               | 2.592409  | 0.142953  |
| 3             | 1             | 0           | -0.237351               | 3.497575  | 0.450256  |
| 4             | 6             | 0           | -1.887793               | 0.318237  | -0.624705 |
| 5             | 1             | 0           | -1.872942               | 0.250994  | -1.717078 |
| 6             | 1             | 0           | -2.941804               | 0.402544  | -0.335098 |
| 7             | 6             | 0           | -0.167516               | -1.461749 | -0.718077 |
| 8             | 1             | 0           | -0.091555               | -2.521574 | -0.448925 |
| 9             | 1             | 0           | -0.317173               | -1.432104 | -1.802484 |
| 10            | 6             | 0           | 1.106914                | -0.801585 | -0.385193 |
| 11            | 6             | 0           | 2.155675                | -0.280425 | -0.103065 |
| 12            | 6             | 0           | 3.410742                | 0.379651  | 0.233124  |
| 13            | 1             | 0           | 3.253658                | 1.448681  | 0.406029  |
| 14            | 1             | 0           | 4.138517                | 0.276967  | -0.577219 |
| 15            | 1             | 0           | 3.855332                | -0.045139 | 1.137910  |
| 16            | 7             | 0           | -1.383739               | -0.943894 | -0.085862 |
| 17            | 6             | 0           | -1.368762               | -1.003367 | 1.370538  |
| 18            | 1             | 0           | -1.138024               | -2.024577 | 1.684710  |
| 19            | 1             | 0           | -0.636302               | -0.324354 | 1.831166  |
| 20            | 1             | 0           | -2.361630               | -0.748415 | 1.750586  |

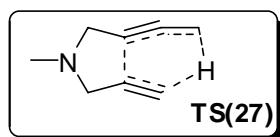

(Nimag=1) -818.1633

| Center Number | Atomic Number | Atomic Type | Coordinates (Angstroms) |          |           |
|---------------|---------------|-------------|-------------------------|----------|-----------|
|               |               |             | X                       | Y        | Z         |
| 1             | 6             | 0           | -0.454008               | 1.121904 | 0.043627  |
| 2             | 6             | 0           | -1.535322               | 1.738479 | -0.031108 |
| 3             | 1             | 0           | -2.070750               | 2.662793 | -0.096900 |
| 4             | 6             | 0           | 1.027033                | 1.145916 | 0.174525  |
| 5             | 1             | 0           | 1.272062                | 1.291419 | 1.245965  |

|    |   |   |           |           |           |
|----|---|---|-----------|-----------|-----------|
| 6  | 1 | 0 | 1.435496  | 1.999408  | -0.373934 |
| 7  | 6 | 0 | 0.869072  | -1.227782 | 0.180801  |
| 8  | 1 | 0 | 1.117693  | -2.124635 | -0.393289 |
| 9  | 1 | 0 | 1.124338  | -1.426749 | 1.240835  |
| 10 | 6 | 0 | -0.565901 | -0.910228 | 0.074770  |
| 11 | 6 | 0 | -1.776212 | -1.184064 | -0.006042 |
| 12 | 6 | 0 | -3.034268 | -0.574411 | -0.093145 |
| 13 | 1 | 0 | -2.621996 | 0.602367  | -0.083222 |
| 14 | 1 | 0 | -3.689001 | -0.677309 | 0.774085  |
| 15 | 1 | 0 | -3.579143 | -0.706031 | -1.029453 |
| 16 | 7 | 0 | 1.612671  | -0.084970 | -0.349517 |
| 17 | 6 | 0 | 3.042605  | -0.178700 | -0.116856 |
| 18 | 1 | 0 | 3.430401  | -1.093435 | -0.571490 |
| 19 | 1 | 0 | 3.549221  | 0.669509  | -0.583461 |
| 20 | 1 | 0 | 3.304984  | -0.189230 | 0.958064  |

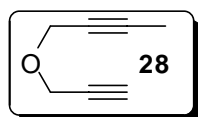

(Nimag=0)

| Center Number | Atomic Number | Atomic Type | Coordinates (Angstroms) |           |           |
|---------------|---------------|-------------|-------------------------|-----------|-----------|
|               |               |             | X                       | Y         | Z         |
| 1             | 6             | 0           | 1.505313                | 1.248344  | 0.072934  |
| 2             | 6             | 0           | 1.209732                | 2.385489  | -0.180861 |
| 3             | 1             | 0           | 0.930849                | 3.384881  | -0.409654 |
| 4             | 6             | 0           | 1.949694                | -0.113404 | 0.383204  |
| 5             | 1             | 0           | 1.729123                | -0.345208 | 1.433980  |
| 6             | 1             | 0           | 3.035110                | -0.163467 | 0.257279  |
| 7             | 6             | 0           | 0.215175                | -1.742590 | -0.011614 |
| 8             | 1             | 0           | 0.059549                | -2.579663 | -0.696224 |
| 9             | 1             | 0           | 0.381467                | -2.162622 | 0.991478  |
| 10            | 6             | 0           | -0.969661               | -0.884804 | 0.007106  |
| 11            | 6             | 0           | -1.959768               | -0.199980 | 0.026561  |
| 12            | 6             | 0           | -3.134299               | 0.660758  | 0.044544  |
| 13            | 1             | 0           | -2.837370               | 1.712944  | 0.001077  |
| 14            | 1             | 0           | -3.718095               | 0.515343  | 0.957995  |
| 15            | 8             | 0           | 1.413667                | -1.118181 | -0.472174 |
| 16            | 1             | 0           | -3.787088               | 0.460361  | -0.809777 |

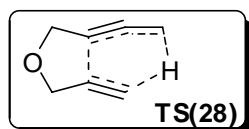

(Nimag=1) -777.8330

| Center<br>Number | Atomic<br>Number | Atomic<br>Type | Coordinates (Angstroms) |           |           |
|------------------|------------------|----------------|-------------------------|-----------|-----------|
|                  |                  |                | X                       | Y         | Z         |
| 1                | 6                | 0              | 0.087829                | 1.080222  | 0.035040  |
| 2                | 6                | 0              | -0.935518               | 1.791605  | -0.006092 |
| 3                | 1                | 0              | -1.402004               | 2.753287  | -0.054064 |
| 4                | 6                | 0              | 1.574039                | 0.977021  | 0.123936  |
| 5                | 1                | 0              | 1.870802                | 1.116444  | 1.174665  |
| 6                | 1                | 0              | 2.049246                | 1.751236  | -0.479710 |
| 7                | 6                | 0              | 1.243198                | -1.326726 | 0.136715  |
| 8                | 1                | 0              | 1.446238                | -2.203108 | -0.479807 |
| 9                | 1                | 0              | 1.515041                | -1.556385 | 1.177980  |
| 10               | 6                | 0              | -0.175073               | -0.917666 | 0.060431  |
| 11               | 6                | 0              | -1.402090               | -1.109879 | -0.002340 |
| 12               | 6                | 0              | -2.614648               | -0.408483 | -0.054837 |
| 13               | 1                | 0              | -2.120806               | 0.729422  | -0.045255 |
| 14               | 1                | 0              | -3.252467               | -0.471531 | 0.828678  |
| 15               | 8                | 0              | 2.052454                | -0.267578 | -0.362883 |
| 16               | 1                | 0              | -3.192099               | -0.495300 | -0.976529 |

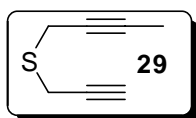

(Nimag=0)

| Center<br>Number | Atomic<br>Number | Atomic<br>Type | Coordinates (Angstroms) |           |           |
|------------------|------------------|----------------|-------------------------|-----------|-----------|
|                  |                  |                | X                       | Y         | Z         |
| 1                | 6                | 0              | 1.087376                | 1.726024  | 0.144424  |
| 2                | 6                | 0              | 0.552973                | 2.736445  | -0.228371 |
| 3                | 1                | 0              | 0.071181                | 3.621306  | -0.565113 |
| 4                | 6                | 0              | 1.782027                | 0.532573  | 0.597278  |
| 5                | 1                | 0              | 1.473869                | 0.260066  | 1.609881  |
| 6                | 1                | 0              | 2.858338                | 0.719230  | 0.626810  |
| 7                | 6                | 0              | 0.094786                | -1.754340 | 0.262150  |
| 8                | 1                | 0              | 0.027791                | -2.709393 | -0.266548 |
| 9                | 1                | 0              | 0.313509                | -1.980610 | 1.309488  |
| 10               | 6                | 0              | -1.141457               | -1.005045 | 0.137758  |
| 11               | 6                | 0              | -2.165517               | -0.378205 | 0.046789  |
| 12               | 6                | 0              | -3.387374               | 0.405086  | -0.073788 |
| 13               | 1                | 0              | -3.152952               | 1.456643  | -0.264834 |
| 14               | 1                | 0              | -3.981799               | 0.355395  | 0.843148  |
| 15               | 16               | 0              | 1.591412                | -0.958891 | -0.482020 |

16 1 0 -4.009407 0.044391 -0.897958

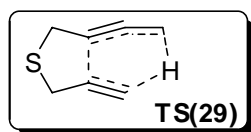

(Nimag=1) -952.9265

| Center Number | Atomic Number | Atomic Type | Coordinates (Angstroms) |           |           |
|---------------|---------------|-------------|-------------------------|-----------|-----------|
|               |               |             | X                       | Y         | Z         |
| 1             | 6             | 0           | -0.295136               | 1.168762  | 0.112092  |
| 2             | 6             | 0           | -1.386733               | 1.750995  | -0.053920 |
| 3             | 1             | 0           | -1.902273               | 2.681789  | -0.182641 |
| 4             | 6             | 0           | 1.164328                | 1.261547  | 0.332746  |
| 5             | 1             | 0           | 1.371978                | 1.324781  | 1.404668  |
| 6             | 1             | 0           | 1.562434                | 2.158085  | -0.146547 |
| 7             | 6             | 0           | 0.941329                | -1.412810 | 0.337625  |
| 8             | 1             | 0           | 1.118490                | -2.347217 | -0.196812 |
| 9             | 1             | 0           | 1.179494                | -1.564275 | 1.393929  |
| 10            | 6             | 0           | -0.442444               | -0.957460 | 0.165119  |
| 11            | 6             | 0           | -1.659224               | -1.147314 | 0.002200  |
| 12            | 6             | 0           | -2.890550               | -0.519054 | -0.175743 |
| 13            | 1             | 0           | -2.427281               | 0.668549  | -0.141519 |
| 14            | 1             | 0           | -3.607100               | -0.589052 | 0.643747  |
| 15            | 16            | 0           | 2.092465                | -0.160906 | -0.371469 |
| 16            | 1             | 0           | -3.364611               | -0.626155 | -1.152041 |

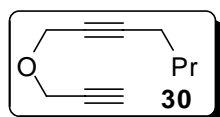

(Nimag=0)

| Center Number | Atomic Number | Atomic Type | Coordinates (Angstroms) |           |           |
|---------------|---------------|-------------|-------------------------|-----------|-----------|
|               |               |             | X                       | Y         | Z         |
| 1             | 6             | 0           | 2.931358                | 1.444937  | -0.066119 |
| 2             | 6             | 0           | 2.408883                | 2.524718  | -0.143486 |
| 3             | 1             | 0           | 1.929496                | 3.470483  | -0.211457 |
| 4             | 6             | 0           | 3.645536                | 0.167300  | 0.012794  |
| 5             | 1             | 0           | 3.750267                | -0.133835 | 1.064057  |
| 6             | 1             | 0           | 4.652838                | 0.305379  | -0.390569 |
| 7             | 6             | 0           | 2.132051                | -1.710041 | -0.051387 |
| 8             | 1             | 0           | 1.954249                | -2.554378 | -0.721672 |
| 9             | 1             | 0           | 2.603190                | -2.106219 | 0.860378  |

|    |   |   |           |           |           |
|----|---|---|-----------|-----------|-----------|
| 10 | 6 | 0 | 0.862054  | -1.070206 | 0.290750  |
| 11 | 6 | 0 | -0.194225 | -0.567132 | 0.578283  |
| 12 | 6 | 0 | -1.470476 | 0.063840  | 0.898939  |
| 13 | 1 | 0 | -1.322639 | 1.150082  | 0.943338  |
| 14 | 1 | 0 | -1.781936 | -0.241125 | 1.905585  |
| 15 | 8 | 0 | 3.064452  | -0.885269 | -0.750436 |
| 16 | 6 | 0 | -2.591584 | -0.262348 | -0.107068 |
| 17 | 6 | 0 | -3.914152 | 0.430865  | 0.235234  |
| 18 | 1 | 0 | -2.738413 | -1.347648 | -0.135491 |
| 19 | 1 | 0 | -2.264583 | 0.031692  | -1.110193 |
| 20 | 6 | 0 | -5.033941 | 0.108408  | -0.758572 |
| 21 | 1 | 0 | -4.226199 | 0.137582  | 1.245238  |
| 22 | 1 | 0 | -3.756813 | 1.516021  | 0.268210  |
| 23 | 1 | 0 | -5.963738 | 0.617337  | -0.490015 |
| 24 | 1 | 0 | -4.764640 | 0.420904  | -1.772328 |
| 25 | 1 | 0 | -5.239724 | -0.966174 | -0.787800 |

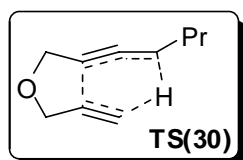

(Nimag=1) -771.7090

| Center Number | Atomic Number | Atomic Type | Coordinates (Angstroms) |           |           |
|---------------|---------------|-------------|-------------------------|-----------|-----------|
|               |               |             | X                       | Y         | Z         |
| 1             | 6             | 0           | -1.517971               | 1.108255  | -0.150899 |
| 2             | 6             | 0           | -0.492109               | 1.756147  | -0.434458 |
| 3             | 1             | 0           | 0.018911                | 2.688112  | -0.557162 |
| 4             | 6             | 0           | -2.963462               | 1.066009  | 0.208595  |
| 5             | 1             | 0           | -3.554700               | 1.228318  | -0.705615 |
| 6             | 1             | 0           | -3.204705               | 1.853197  | 0.924301  |
| 7             | 6             | 0           | -2.754689               | -1.253485 | 0.111685  |
| 8             | 1             | 0           | -2.823163               | -2.126570 | 0.761773  |
| 9             | 1             | 0           | -3.324522               | -1.453521 | -0.808347 |
| 10            | 6             | 0           | -1.354360               | -0.923673 | -0.219145 |
| 11            | 6             | 0           | -0.169657               | -1.165292 | -0.506430 |
| 12            | 6             | 0           | 1.044207                | -0.526870 | -0.812140 |
| 13            | 1             | 0           | 0.585018                | 0.627513  | -0.719795 |
| 14            | 1             | 0           | 1.339841                | -0.609344 | -1.863489 |
| 15            | 8             | 0           | -3.331112               | -0.161512 | 0.821227  |
| 16            | 6             | 0           | 2.234294                | -0.658378 | 0.142608  |
| 17            | 6             | 0           | 3.369976                | 0.317998  | -0.183869 |
| 18            | 1             | 0           | 2.615355                | -1.685054 | 0.099131  |



|    |   |   |          |           |           |
|----|---|---|----------|-----------|-----------|
| 19 | 1 | 0 | 1.885010 | -0.499393 | 1.168306  |
| 20 | 6 | 0 | 4.568739 | 0.172931  | 0.757551  |
| 21 | 1 | 0 | 3.696663 | 0.159111  | -1.218880 |
| 22 | 1 | 0 | 2.990308 | 1.345093  | -0.137322 |
| 23 | 1 | 0 | 5.363619 | 0.878718  | 0.501680  |
| 24 | 1 | 0 | 4.280322 | 0.359666  | 1.796609  |
| 25 | 1 | 0 | 4.991134 | -0.835597 | 0.708000  |

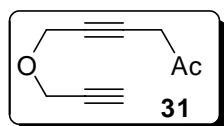

(Nimag=0)

| Center Number | Atomic Number | Atomic Type | Coordinates (Angstroms) |           |           |
|---------------|---------------|-------------|-------------------------|-----------|-----------|
|               |               |             | X                       | Y         | Z         |
| 1             | 6             | 0           | -2.579017               | 1.368113  | -0.016158 |
| 2             | 6             | 0           | -2.099220               | 2.468696  | 0.042733  |
| 3             | 1             | 0           | -1.663227               | 3.436480  | 0.093751  |
| 4             | 6             | 0           | -3.246123               | 0.064203  | -0.074400 |
| 5             | 1             | 0           | -3.383432               | -0.235099 | -1.122361 |
| 6             | 1             | 0           | -4.239567               | 0.159841  | 0.372452  |
| 7             | 6             | 0           | -1.638627               | -1.734783 | -0.075469 |
| 8             | 1             | 0           | -1.421038               | -2.594772 | 0.562484  |
| 9             | 1             | 0           | -2.095379               | -2.117502 | -0.999867 |
| 10            | 6             | 0           | -0.397768               | -1.030903 | -0.401256 |
| 11            | 6             | 0           | 0.632260                | -0.470333 | -0.674731 |
| 12            | 6             | 0           | 1.865235                | 0.231633  | -1.000513 |
| 13            | 1             | 0           | 1.649129                | 1.303946  | -1.111787 |
| 14            | 1             | 0           | 2.273506                | -0.102806 | -1.957598 |
| 15            | 8             | 0           | -2.594871               | -0.971423 | 0.656288  |
| 16            | 6             | 0           | 3.000233                | 0.132941  | 0.039513  |
| 17            | 8             | 0           | 4.149690                | 0.135291  | -0.335306 |
| 18            | 6             | 0           | 2.616201                | 0.081306  | 1.498326  |
| 19            | 1             | 0           | 1.877501                | 0.852920  | 1.733949  |
| 20            | 1             | 0           | 2.140086                | -0.879293 | 1.716414  |
| 21            | 1             | 0           | 3.504820                | 0.200102  | 2.116437  |

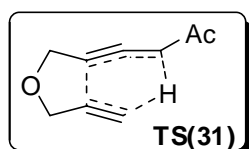

(Nimag=1) -1039.8115

| Center | Atomic | Atomic | Coordinates (Angstroms) |  |  |
|--------|--------|--------|-------------------------|--|--|
|--------|--------|--------|-------------------------|--|--|

| Number | Number | Type | X         | Y         | Z         |
|--------|--------|------|-----------|-----------|-----------|
| 1      | 6      | 0    | -1.298996 | 1.196409  | 0.107558  |
| 2      | 6      | 0    | -0.312436 | 1.954613  | 0.065331  |
| 3      | 1      | 0    | 0.085818  | 2.930768  | 0.261864  |
| 4      | 6      | 0    | -2.722489 | 0.841750  | 0.324357  |
| 5      | 1      | 0    | -3.297602 | 1.145097  | -0.563477 |
| 6      | 1      | 0    | -3.113971 | 1.377261  | 1.191351  |
| 7      | 6      | 0    | -2.241697 | -1.344008 | -0.368731 |
| 8      | 1      | 0    | -2.232409 | -2.360396 | 0.027752  |
| 9      | 1      | 0    | -2.790357 | -1.344170 | -1.322095 |
| 10     | 6      | 0    | -0.883154 | -0.823057 | -0.569141 |
| 11     | 6      | 0    | 0.317227  | -0.740794 | -0.843073 |
| 12     | 6      | 0    | 1.442076  | 0.085254  | -0.904817 |
| 13     | 1      | 0    | 0.809067  | 1.137046  | -0.449438 |
| 14     | 1      | 0    | 1.778651  | 0.390880  | -1.896029 |
| 15     | 8      | 0    | -2.920355 | -0.538906 | 0.593414  |
| 16     | 6      | 0    | 2.614466  | -0.109602 | 0.035743  |
| 17     | 8      | 0    | 3.698414  | 0.351039  | -0.253474 |
| 18     | 6      | 0    | 2.362238  | -0.840981 | 1.334011  |
| 19     | 1      | 0    | 1.482687  | -0.434113 | 1.840810  |
| 20     | 1      | 0    | 2.149890  | -1.894679 | 1.129074  |
| 21     | 1      | 0    | 3.240348  | -0.762266 | 1.973235  |

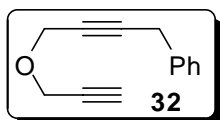

(Nimag=0)

| Center Number | Atomic Number | Atomic Type | Coordinates (Angstroms) |           |           |
|---------------|---------------|-------------|-------------------------|-----------|-----------|
|               |               |             | X                       | Y         | Z         |
| 1             | 6             | 0           | -3.281915               | 1.369909  | -0.606640 |
| 2             | 6             | 0           | -2.679403               | 2.276949  | -1.115704 |
| 3             | 1             | 0           | -2.130435               | 3.069102  | -1.563276 |
| 4             | 6             | 0           | -4.083227               | 0.314222  | 0.018949  |
| 5             | 1             | 0           | -4.347522               | -0.444589 | -0.729773 |
| 6             | 1             | 0           | -5.015862               | 0.753164  | 0.384741  |
| 7             | 6             | 0           | -2.706994               | -1.470157 | 0.880016  |
| 8             | 1             | 0           | -2.466740               | -1.878748 | 1.864282  |
| 9             | 1             | 0           | -3.335366               | -2.208216 | 0.360033  |
| 10            | 6             | 0           | -1.478846               | -1.251104 | 0.116205  |
| 11            | 6             | 0           | -0.461626               | -1.091641 | -0.508142 |
| 12            | 6             | 0           | 0.754919                | -0.858464 | -1.279733 |

|    |   |   |           |           |           |
|----|---|---|-----------|-----------|-----------|
| 13 | 1 | 0 | 0.517554  | -0.154634 | -2.089144 |
| 14 | 1 | 0 | 1.049043  | -1.790186 | -1.774774 |
| 15 | 8 | 0 | -3.471636 | -0.296009 | 1.152129  |
| 16 | 6 | 0 | 1.940684  | -0.318451 | -0.487324 |
| 17 | 6 | 0 | 3.240641  | -0.626159 | -0.898929 |
| 18 | 6 | 0 | 1.764495  | 0.515668  | 0.619165  |
| 19 | 6 | 0 | 4.343912  | -0.107196 | -0.223823 |
| 20 | 1 | 0 | 3.392981  | -1.279168 | -1.752884 |
| 21 | 6 | 0 | 2.866591  | 1.035876  | 1.295772  |
| 22 | 1 | 0 | 0.761054  | 0.750408  | 0.955832  |
| 23 | 6 | 0 | 4.159736  | 0.727300  | 0.877133  |
| 24 | 1 | 0 | 5.345349  | -0.359640 | -0.554556 |
| 25 | 1 | 0 | 2.713169  | 1.680525  | 2.154232  |
| 26 | 1 | 0 | 5.016057  | 1.129543  | 1.406593  |

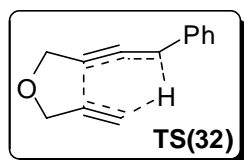

(Nimag=1) -953.7005

| Center Number | Atomic Number | Atomic Type | Coordinates (Angstroms) |           |           |
|---------------|---------------|-------------|-------------------------|-----------|-----------|
|               |               |             | X                       | Y         | Z         |
| 1             | 6             | 0           | 2.244588                | 0.922276  | -0.747181 |
| 2             | 6             | 0           | 1.307697                | 1.701774  | -0.998384 |
| 3             | 1             | 0           | 0.898768                | 2.475797  | -1.616423 |
| 4             | 6             | 0           | 3.608377                | 0.365637  | -0.922298 |
| 5             | 1             | 0           | 4.326111                | 1.040095  | -0.430882 |
| 6             | 1             | 0           | 3.860481                | 0.303607  | -1.982516 |
| 7             | 6             | 0           | 3.177524                | -1.043432 | 0.897894  |
| 8             | 1             | 0           | 3.097693                | -2.106467 | 1.129721  |
| 9             | 1             | 0           | 3.844767                | -0.572493 | 1.635280  |
| 10            | 6             | 0           | 1.864732                | -0.381756 | 0.907698  |
| 11            | 6             | 0           | 0.708942                | -0.090481 | 1.236055  |
| 12            | 6             | 0           | -0.374257               | 0.759157  | 0.963181  |
| 13            | 1             | 0           | 0.229334                | 1.363146  | 0.003602  |
| 14            | 1             | 0           | -0.518329               | 1.554396  | 1.698772  |
| 15            | 8             | 0           | 3.742934                | -0.953001 | -0.408221 |
| 16            | 6             | 0           | -1.673251               | 0.230304  | 0.429146  |
| 17            | 6             | 0           | -1.738526               | -0.969068 | -0.290286 |
| 18            | 6             | 0           | -2.846736               | 0.971501  | 0.606643  |
| 19            | 6             | 0           | -2.947808               | -1.413773 | -0.816145 |
| 20            | 1             | 0           | -0.836873               | -1.554598 | -0.430249 |

|    |   |   |           |           |           |
|----|---|---|-----------|-----------|-----------|
| 21 | 6 | 0 | -4.058105 | 0.527356  | 0.079791  |
| 22 | 1 | 0 | -2.812268 | 1.901491  | 1.165555  |
| 23 | 6 | 0 | -4.112918 | -0.667854 | -0.634025 |
| 24 | 1 | 0 | -2.982166 | -2.346453 | -1.368403 |
| 25 | 1 | 0 | -4.958077 | 1.113129  | 0.230907  |
| 26 | 1 | 0 | -5.054472 | -1.017488 | -1.042134 |

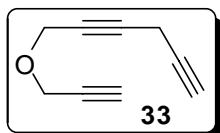

(Nimag=0)

| Center Number | Atomic Number | Atomic Type | Coordinates (Angstroms) |           |           |
|---------------|---------------|-------------|-------------------------|-----------|-----------|
|               |               |             | X                       | Y         | Z         |
| 1             | 6             | 0           | 2.267746                | 1.292925  | -0.087527 |
| 2             | 6             | 0           | 1.862302                | 2.414601  | -0.236623 |
| 3             | 1             | 0           | 1.488794                | 3.400185  | -0.371759 |
| 4             | 6             | 0           | 2.841900                | -0.045538 | 0.076794  |
| 5             | 1             | 0           | 2.896619                | -0.297916 | 1.144607  |
| 6             | 1             | 0           | 3.864420                | -0.037059 | -0.310894 |
| 7             | 6             | 0           | 1.124148                | -1.738203 | 0.066820  |
| 8             | 1             | 0           | 0.866151                | -2.598004 | -0.555827 |
| 9             | 1             | 0           | 1.512551                | -2.124311 | 1.020699  |
| 10            | 6             | 0           | -0.073584               | -0.935637 | 0.317006  |
| 11            | 6             | 0           | -1.075586               | -0.304263 | 0.526069  |
| 12            | 6             | 0           | -2.262736               | 0.512545  | 0.784933  |
| 13            | 1             | 0           | -1.989976               | 1.570883  | 0.686964  |
| 14            | 1             | 0           | -2.579859               | 0.378463  | 1.826393  |
| 15            | 8             | 0           | 2.166366                | -1.072770 | -0.642809 |
| 16            | 6             | 0           | -3.393480               | 0.222965  | -0.101977 |
| 17            | 6             | 0           | -4.330059               | -0.003128 | -0.818738 |
| 18            | 1             | 0           | -5.153539               | -0.207679 | -1.458258 |

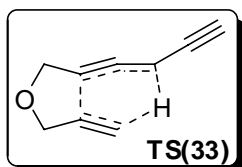

(Nimag=1) -1012.5784

| Center Number | Atomic Number | Atomic Type | Coordinates (Angstroms) |          |           |
|---------------|---------------|-------------|-------------------------|----------|-----------|
|               |               |             | X                       | Y        | Z         |
| 1             | 6             | 0           | -0.936381               | 1.160260 | -0.055641 |

|    |   |   |           |           |           |
|----|---|---|-----------|-----------|-----------|
| 2  | 6 | 0 | 0.045944  | 1.901606  | -0.239931 |
| 3  | 1 | 0 | 0.454275  | 2.892700  | -0.237093 |
| 4  | 6 | 0 | -2.365632 | 0.866381  | 0.214286  |
| 5  | 1 | 0 | -2.933024 | 1.012035  | -0.717557 |
| 6  | 1 | 0 | -2.754525 | 1.552481  | 0.968957  |
| 7  | 6 | 0 | -1.879581 | -1.406771 | -0.058772 |
| 8  | 1 | 0 | -1.883138 | -2.335125 | 0.513987  |
| 9  | 1 | 0 | -2.401820 | -1.578903 | -1.011703 |
| 10 | 6 | 0 | -0.512064 | -0.930160 | -0.310070 |
| 11 | 6 | 0 | 0.697128  | -0.935275 | -0.558184 |
| 12 | 6 | 0 | 1.821209  | -0.117194 | -0.772233 |
| 13 | 1 | 0 | 1.180155  | 0.988570  | -0.562165 |
| 14 | 1 | 0 | 2.133653  | -0.030314 | -1.816831 |
| 15 | 8 | 0 | -2.580599 | -0.442125 | 0.722478  |
| 16 | 6 | 0 | 2.939568  | -0.168200 | 0.142442  |
| 17 | 6 | 0 | 3.880217  | -0.167942 | 0.891968  |
| 18 | 1 | 0 | 4.706772  | -0.180672 | 1.559385  |

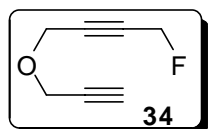

(Nimag=0)

| Center Number | Atomic Number | Atomic Type | Coordinates (Angstroms) |           |           |
|---------------|---------------|-------------|-------------------------|-----------|-----------|
|               |               |             | X                       | Y         | Z         |
| 1             | 6             | 0           | 1.765861                | 1.391097  | 0.055027  |
| 2             | 6             | 0           | 1.333077                | 2.456066  | -0.295542 |
| 3             | 1             | 0           | 0.933911                | 3.390911  | -0.605394 |
| 4             | 6             | 0           | 2.366360                | 0.129122  | 0.493693  |
| 5             | 1             | 0           | 2.083396                | -0.075240 | 1.535010  |
| 6             | 1             | 0           | 3.454901                | 0.227251  | 0.461868  |
| 7             | 6             | 0           | 0.911404                | -1.743124 | 0.046116  |
| 8             | 1             | 0           | 0.950617                | -2.646743 | -0.566803 |
| 9             | 1             | 0           | 0.994507                | -2.053882 | 1.098005  |
| 10            | 6             | 0           | -0.373833               | -1.072515 | -0.147161 |
| 11            | 6             | 0           | -1.449860               | -0.551733 | -0.288697 |
| 12            | 6             | 0           | -2.724769               | 0.110635  | -0.489904 |
| 13            | 1             | 0           | -2.593999               | 1.026074  | -1.073792 |
| 14            | 8             | 0           | 2.057919                | -0.991131 | -0.334561 |
| 15            | 1             | 0           | -3.433631               | -0.543414 | -1.004984 |
| 16            | 9             | 0           | -3.313611               | 0.476312  | 0.732376  |

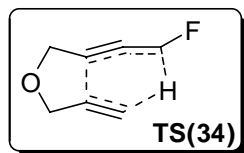

(Nimag=1) -758.7103

---

| Center Number | Atomic Number | Atomic Type | Coordinates (Angstroms) |           |           |
|---------------|---------------|-------------|-------------------------|-----------|-----------|
|               |               |             | X                       | Y         | Z         |
| 1             | 6             | 0           | 0.598916                | 1.107523  | -0.003670 |
| 2             | 6             | 0           | -0.361282               | 1.877840  | -0.187854 |
| 3             | 1             | 0           | -0.788953               | 2.852265  | -0.296838 |
| 4             | 6             | 0           | 2.040970                | 0.883712  | 0.296613  |
| 5             | 1             | 0           | 2.183518                | 0.933413  | 1.386439  |
| 6             | 1             | 0           | 2.656804                | 1.650713  | -0.174124 |
| 7             | 6             | 0           | 1.559470                | -1.389293 | 0.104406  |
| 8             | 1             | 0           | 1.764299                | -2.225075 | -0.565532 |
| 9             | 1             | 0           | 1.688610                | -1.728814 | 1.142930  |
| 10            | 6             | 0           | 0.184275                | -0.870200 | -0.067469 |
| 11            | 6             | 0           | -1.042120               | -1.012524 | -0.230675 |
| 12            | 6             | 0           | -2.168229               | -0.198542 | -0.439295 |
| 13            | 1             | 0           | -1.577879               | 0.886513  | -0.403524 |
| 14            | 8             | 0           | 2.492462                | -0.363998 | -0.208603 |
| 15            | 1             | 0           | -2.680120               | -0.266921 | -1.399885 |
| 16            | 9             | 0           | -3.117553               | -0.175689 | 0.571890  |

---

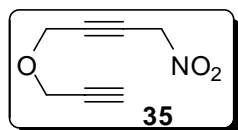

(Nimag=0)

---

| Center Number | Atomic Number | Atomic Type | Coordinates (Angstroms) |           |           |
|---------------|---------------|-------------|-------------------------|-----------|-----------|
|               |               |             | X                       | Y         | Z         |
| 1             | 6             | 0           | 2.205386                | 1.540289  | 0.073748  |
| 2             | 6             | 0           | 1.689333                | 2.532969  | -0.365286 |
| 3             | 1             | 0           | 1.223466                | 3.405221  | -0.754739 |
| 4             | 6             | 0           | 2.901875                | 0.377493  | 0.628844  |
| 5             | 1             | 0           | 2.495186                | 0.137107  | 1.619936  |
| 6             | 1             | 0           | 3.958216                | 0.628083  | 0.757959  |
| 7             | 6             | 0           | 1.816335                | -1.689440 | 0.022765  |
| 8             | 1             | 0           | 2.061328                | -2.572639 | -0.571831 |
| 9             | 1             | 0           | 1.801336                | -1.995082 | 1.079225  |
| 10            | 6             | 0           | 0.485923                | -1.202559 | -0.342163 |

---

|    |   |   |           |           |           |
|----|---|---|-----------|-----------|-----------|
| 11 | 6 | 0 | -0.619705 | -0.814319 | -0.612126 |
| 12 | 6 | 0 | -1.920041 | -0.308999 | -0.972733 |
| 13 | 1 | 0 | -1.866193 | 0.591905  | -1.584978 |
| 14 | 8 | 0 | 2.880719  | -0.776655 | -0.211904 |
| 15 | 1 | 0 | -2.529421 | -1.045586 | -1.501613 |
| 16 | 7 | 0 | -2.792732 | 0.094282  | 0.236106  |
| 17 | 8 | 0 | -3.789174 | 0.739862  | -0.046178 |
| 18 | 8 | 0 | -2.460224 | -0.265907 | 1.346207  |

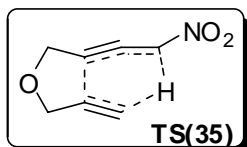

(Nimag=1) -1082.0157

| Center Number | Atomic Number | Atomic Type | Coordinates (Angstroms) |           |           |
|---------------|---------------|-------------|-------------------------|-----------|-----------|
|               |               |             | X                       | Y         | Z         |
| 1             | 6             | 0           | 1.241782                | 1.173845  | 0.044780  |
| 2             | 6             | 0           | 0.260199                | 1.912626  | -0.160120 |
| 3             | 1             | 0           | -0.118284               | 2.915752  | -0.193123 |
| 4             | 6             | 0           | 2.630262                | 0.866063  | 0.470112  |
| 5             | 1             | 0           | 2.647693                | 0.779927  | 1.566563  |
| 6             | 1             | 0           | 3.298574                | 1.675642  | 0.171536  |
| 7             | 6             | 0           | 2.220667                | -1.390184 | 0.008577  |
| 8             | 1             | 0           | 2.536333                | -2.167575 | -0.688385 |
| 9             | 1             | 0           | 2.249871                | -1.797488 | 1.029677  |
| 10            | 6             | 0           | 0.862393                | -0.911624 | -0.287087 |
| 11            | 6             | 0           | -0.331931               | -0.914894 | -0.597331 |
| 12            | 6             | 0           | -1.438321               | -0.108262 | -0.829490 |
| 13            | 1             | 0           | -0.832678               | 1.023933  | -0.559319 |
| 14            | 8             | 0           | 3.141821                | -0.313262 | -0.130941 |
| 15            | 1             | 0           | -1.860916               | -0.018485 | -1.825318 |
| 16            | 7             | 0           | -2.565039               | -0.165053 | 0.166208  |
| 17            | 8             | 0           | -2.329305               | -0.576635 | 1.288529  |
| 18            | 8             | 0           | -3.641968               | 0.262177  | -0.227805 |

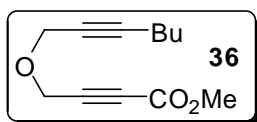

(Nimag=0)

| Center Number | Atomic Number | Atomic Type | Coordinates (Angstroms) |   |   |
|---------------|---------------|-------------|-------------------------|---|---|
|               |               |             | X                       | Y | Z |

|    |   |   |           |           |           |
|----|---|---|-----------|-----------|-----------|
| 1  | 6 | 0 | -2.335045 | 0.998886  | -0.189692 |
| 2  | 6 | 0 | -2.234397 | -0.201608 | -0.167066 |
| 3  | 6 | 0 | -2.531891 | 2.450063  | -0.218017 |
| 4  | 1 | 0 | -2.813183 | 2.787805  | 0.790908  |
| 5  | 1 | 0 | -3.370580 | 2.675678  | -0.882511 |
| 6  | 6 | 0 | -0.365388 | 3.426532  | 0.207426  |
| 7  | 1 | 0 | 0.220123  | 4.229940  | -0.245407 |
| 8  | 1 | 0 | -0.770807 | 3.806248  | 1.156654  |
| 9  | 6 | 0 | 0.481137  | 2.261032  | 0.449764  |
| 10 | 6 | 0 | 1.170103  | 1.288952  | 0.629552  |
| 11 | 6 | 0 | 1.973756  | 0.083384  | 0.803403  |
| 12 | 1 | 0 | 1.349300  | -0.780008 | 0.543293  |
| 13 | 1 | 0 | 2.233702  | -0.028957 | 1.863205  |
| 14 | 8 | 0 | -1.440857 | 3.205668  | -0.714411 |
| 15 | 6 | 0 | 3.258996  | 0.070165  | -0.047914 |
| 16 | 6 | 0 | 4.080864  | -1.208379 | 0.144132  |
| 17 | 1 | 0 | 3.868445  | 0.944439  | 0.206863  |
| 18 | 1 | 0 | 2.985104  | 0.179397  | -1.102701 |
| 19 | 6 | 0 | 5.356513  | -1.232502 | -0.702658 |
| 20 | 1 | 0 | 4.344567  | -1.313954 | 1.203861  |
| 21 | 1 | 0 | 3.459582  | -2.077048 | -0.103841 |
| 22 | 1 | 0 | 5.922771  | -2.154381 | -0.543680 |
| 23 | 1 | 0 | 5.123619  | -1.165756 | -1.769935 |
| 24 | 1 | 0 | 6.012708  | -0.392306 | -0.454404 |
| 25 | 6 | 0 | -1.974511 | -1.616916 | -0.114420 |
| 26 | 8 | 0 | -0.876035 | -2.113361 | -0.223603 |
| 27 | 8 | 0 | -3.106507 | -2.320487 | 0.078385  |
| 28 | 6 | 0 | -2.948025 | -3.751222 | 0.154104  |
| 29 | 1 | 0 | -3.950672 | -4.141315 | 0.312296  |
| 30 | 1 | 0 | -2.525815 | -4.136643 | -0.774787 |
| 31 | 1 | 0 | -2.294348 | -4.018013 | 0.985548  |

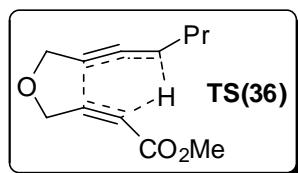

(Nimag=1) -467.6416

| Center Number | Atomic Number | Atomic Type | Coordinates (Angstroms) |          |          |
|---------------|---------------|-------------|-------------------------|----------|----------|
|               |               |             | X                       | Y        | Z        |
| 1             | 6             | 0           | -1.611301               | 0.357151 | 0.143879 |
| 2             | 6             | 0           | -0.494111               | 0.911046 | 0.062828 |
| 3             | 6             | 0           | -3.049729               | 0.558682 | 0.525824 |



|    |   |   |           |           |           |
|----|---|---|-----------|-----------|-----------|
| 4  | 1 | 0 | -3.555470 | 1.094300  | -0.291259 |
| 5  | 1 | 0 | -3.120523 | 1.152038  | 1.437853  |
| 6  | 6 | 0 | -3.301200 | -1.619549 | -0.211311 |
| 7  | 1 | 0 | -3.544906 | -2.612867 | 0.165774  |
| 8  | 1 | 0 | -3.854674 | -1.447223 | -1.146320 |
| 9  | 6 | 0 | -1.844454 | -1.463351 | -0.449209 |
| 10 | 6 | 0 | -0.735420 | -1.899656 | -0.812639 |
| 11 | 6 | 0 | 0.621590  | -1.534015 | -0.956188 |
| 12 | 1 | 0 | 0.474340  | -0.411167 | -0.586722 |
| 13 | 1 | 0 | 0.943603  | -1.443959 | -1.999114 |
| 14 | 8 | 0 | -3.690177 | -0.678891 | 0.779467  |
| 15 | 6 | 0 | 1.677031  | -2.219126 | -0.078385 |
| 16 | 6 | 0 | 3.025441  | -1.490579 | -0.102248 |
| 17 | 1 | 0 | 1.808824  | -3.250606 | -0.423843 |
| 18 | 1 | 0 | 1.301967  | -2.276375 | 0.948326  |
| 19 | 6 | 0 | 4.094826  | -2.198161 | 0.734229  |
| 20 | 1 | 0 | 3.371286  | -1.402901 | -1.139767 |
| 21 | 1 | 0 | 2.889007  | -0.468613 | 0.267802  |
| 22 | 1 | 0 | 5.043145  | -1.655161 | 0.704980  |
| 23 | 1 | 0 | 3.789216  | -2.274081 | 1.782109  |
| 24 | 1 | 0 | 4.280512  | -3.212671 | 0.367287  |
| 25 | 6 | 0 | 0.462308  | 1.961065  | 0.289209  |
| 26 | 8 | 0 | 1.199781  | 2.040953  | 1.248780  |
| 27 | 8 | 0 | 0.463957  | 2.857889  | -0.729332 |
| 28 | 6 | 0 | 1.404347  | 3.939903  | -0.601150 |
| 29 | 1 | 0 | 1.271876  | 4.542949  | -1.496933 |
| 30 | 1 | 0 | 1.192802  | 4.529034  | 0.292407  |
| 31 | 1 | 0 | 2.424547  | 3.557236  | -0.542919 |

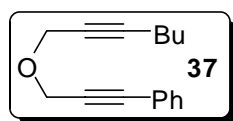

(Nimag=0)

| Center Number | Atomic Number | Atomic Type | Coordinates (Angstroms) |          |           |
|---------------|---------------|-------------|-------------------------|----------|-----------|
|               |               |             | X                       | Y        | Z         |
| 1             | 6             | 0           | -1.334460               | 2.251070 | -0.100361 |
| 2             | 6             | 0           | -1.849184               | 1.159440 | -0.075020 |
| 3             | 6             | 0           | -0.783914               | 3.606478 | -0.153599 |
| 4             | 1             | 0           | -0.709610               | 4.016965 | 0.863471  |
| 5             | 1             | 0           | -1.469427               | 4.247638 | -0.715530 |
| 6             | 6             | 0           | 1.622719                | 3.490735 | -0.012419 |
| 7             | 1             | 0           | 2.458343                | 3.869662 | -0.605994 |

|    |   |   |           |           |           |
|----|---|---|-----------|-----------|-----------|
| 8  | 1 | 0 | 1.561277  | 4.103750  | 0.899142  |
| 9  | 6 | 0 | 1.866939  | 2.094276  | 0.349666  |
| 10 | 6 | 0 | 2.105510  | 0.954084  | 0.657701  |
| 11 | 6 | 0 | 2.370085  | -0.440118 | 0.999417  |
| 12 | 1 | 0 | 1.415123  | -0.942515 | 1.195633  |
| 13 | 1 | 0 | 2.932910  | -0.479047 | 1.940228  |
| 14 | 8 | 0 | 0.469956  | 3.722613  | -0.821842 |
| 15 | 6 | 0 | 3.140798  | -1.208378 | -0.092741 |
| 16 | 6 | 0 | 3.406025  | -2.668630 | 0.286364  |
| 17 | 1 | 0 | 4.089972  | -0.696495 | -0.285635 |
| 18 | 1 | 0 | 2.569893  | -1.164057 | -1.026279 |
| 19 | 6 | 0 | 4.170551  | -3.437828 | -0.794782 |
| 20 | 1 | 0 | 3.970422  | -2.702430 | 1.226471  |
| 21 | 1 | 0 | 2.451196  | -3.170138 | 0.485662  |
| 22 | 1 | 0 | 4.347255  | -4.474851 | -0.496470 |
| 23 | 1 | 0 | 3.614104  | -3.453177 | -1.737049 |
| 24 | 1 | 0 | 5.143917  | -2.978506 | -0.993387 |
| 25 | 6 | 0 | -2.432483 | -0.142511 | -0.043816 |
| 26 | 6 | 0 | -2.898414 | -0.690838 | 1.164254  |
| 27 | 6 | 0 | -2.553699 | -0.899303 | -1.222807 |
| 28 | 6 | 0 | -3.469543 | -1.958767 | 1.188644  |
| 29 | 1 | 0 | -2.808615 | -0.112335 | 2.075901  |
| 30 | 6 | 0 | -3.122199 | -2.168246 | -1.189586 |
| 31 | 1 | 0 | -2.197725 | -0.481067 | -2.156619 |
| 32 | 6 | 0 | -3.583020 | -2.702205 | 0.013828  |
| 33 | 1 | 0 | -3.826657 | -2.368187 | 2.126997  |
| 34 | 1 | 0 | -3.208374 | -2.741119 | -2.106110 |
| 35 | 1 | 0 | -4.027913 | -3.690551 | 0.035841  |

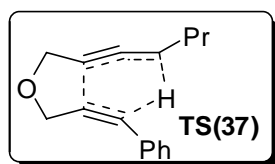

(Nimag=1) -359.3248

| Center Number | Atomic Number | Atomic Type | Coordinates (Angstroms) |           |           |
|---------------|---------------|-------------|-------------------------|-----------|-----------|
|               |               |             | X                       | Y         | Z         |
| 1             | 6             | 0           | -0.662311               | -1.516942 | -0.136415 |
| 2             | 6             | 0           | 0.424353                | -0.913708 | 0.026677  |
| 3             | 6             | 0           | -1.128966               | -2.809583 | -0.770596 |
| 4             | 1             | 0           | -0.900708               | -3.636598 | -0.081583 |
| 5             | 1             | 0           | -0.624045               | -2.985847 | -1.720174 |
| 6             | 6             | 0           | -3.149846               | -2.108051 | 0.067726  |

|    |   |   |           |           |           |
|----|---|---|-----------|-----------|-----------|
| 7  | 1 | 0 | -4.131635 | -1.769119 | -0.261397 |
| 8  | 1 | 0 | -3.275794 | -2.813782 | 0.902637  |
| 9  | 6 | 0 | -2.282936 | -0.963952 | 0.490769  |
| 10 | 6 | 0 | -2.273914 | 0.145599  | 1.084978  |
| 11 | 6 | 0 | -1.280555 | 1.103814  | 1.473166  |
| 12 | 1 | 0 | -0.350671 | 0.607346  | 1.004862  |
| 13 | 1 | 0 | -1.102374 | 1.086619  | 2.554589  |
| 14 | 8 | 0 | -2.518170 | -2.748318 | -1.029513 |
| 15 | 6 | 0 | -1.408732 | 2.552631  | 0.975210  |
| 16 | 6 | 0 | -1.586169 | 2.689116  | -0.539396 |
| 17 | 1 | 0 | -0.511344 | 3.097436  | 1.290483  |
| 18 | 1 | 0 | -2.252817 | 3.026895  | 1.488862  |
| 19 | 6 | 0 | -1.696071 | 4.147112  | -0.994257 |
| 20 | 1 | 0 | -0.741048 | 2.208067  | -1.045143 |
| 21 | 1 | 0 | -2.479786 | 2.137390  | -0.849205 |
| 22 | 1 | 0 | -1.824451 | 4.216563  | -2.077979 |
| 23 | 1 | 0 | -2.552477 | 4.643981  | -0.527231 |
| 24 | 1 | 0 | -0.799220 | 4.716477  | -0.729439 |
| 25 | 6 | 0 | 1.792241  | -0.535839 | -0.002366 |
| 26 | 6 | 0 | 2.670119  | -0.908745 | 1.038870  |
| 27 | 6 | 0 | 2.313049  | 0.211197  | -1.081714 |
| 28 | 6 | 0 | 4.012311  | -0.554202 | 0.992621  |
| 29 | 1 | 0 | 2.283358  | -1.478001 | 1.875850  |
| 30 | 6 | 0 | 3.657065  | 0.560317  | -1.116147 |
| 31 | 1 | 0 | 1.650399  | 0.506170  | -1.886707 |
| 32 | 6 | 0 | 4.514540  | 0.182407  | -0.081541 |
| 33 | 1 | 0 | 4.671728  | -0.853446 | 1.799833  |
| 34 | 1 | 0 | 4.039171  | 1.130481  | -1.955728 |
| 35 | 1 | 0 | 5.562024  | 0.458890  | -0.111942 |

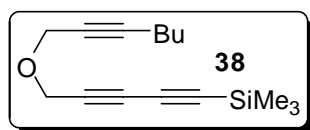

(Nimag=0)

| Center Number | Atomic Number | Atomic Type | Coordinates (Angstroms) |           |           |
|---------------|---------------|-------------|-------------------------|-----------|-----------|
|               |               |             | X                       | Y         | Z         |
| 1             | 6             | 0           | 0.810438                | -2.782271 | -0.082937 |
| 2             | 6             | 0           | -0.224729               | -2.153317 | -0.060359 |
| 3             | 6             | 0           | 2.007435                | -3.621387 | -0.088383 |
| 4             | 1             | 0           | 2.394860                | -3.709380 | -1.113082 |
| 5             | 1             | 0           | 1.730880                | -4.626916 | 0.244168  |
| 6             | 6             | 0           | 4.010120                | -2.315190 | 0.224541  |

|    |    |   |           |           |           |
|----|----|---|-----------|-----------|-----------|
| 7  | 1  | 0 | 4.770700  | -2.205819 | 1.001022  |
| 8  | 1  | 0 | 4.484136  | -2.810852 | -0.635610 |
| 9  | 6  | 0 | 3.510972  | -1.002024 | -0.180480 |
| 10 | 6  | 0 | 3.115361  | 0.081457  | -0.529075 |
| 11 | 6  | 0 | 2.611248  | 1.392423  | -0.925266 |
| 12 | 1  | 0 | 1.539237  | 1.303549  | -1.139279 |
| 13 | 1  | 0 | 3.085928  | 1.691126  | -1.867950 |
| 14 | 8  | 0 | 3.034509  | -3.188070 | 0.798390  |
| 15 | 6  | 0 | 2.835848  | 2.489236  | 0.134794  |
| 16 | 6  | 0 | 2.304236  | 3.855773  | -0.308634 |
| 17 | 1  | 0 | 3.907255  | 2.560773  | 0.351879  |
| 18 | 1  | 0 | 2.349954  | 2.185463  | 1.067997  |
| 19 | 6  | 0 | 2.522853  | 4.951273  | 0.738795  |
| 20 | 1  | 0 | 2.790363  | 4.146262  | -1.248051 |
| 21 | 1  | 0 | 1.233642  | 3.772663  | -0.532215 |
| 22 | 1  | 0 | 2.131840  | 5.913364  | 0.396661  |
| 23 | 1  | 0 | 2.021509  | 4.704041  | 1.679667  |
| 24 | 1  | 0 | 3.587231  | 5.083574  | 0.956560  |
| 25 | 6  | 0 | -1.379474 | -1.432292 | -0.040766 |
| 26 | 6  | 0 | -2.417498 | -0.791300 | -0.021412 |
| 27 | 14 | 0 | -3.997024 | 0.161534  | 0.021289  |
| 28 | 6  | 0 | -3.942465 | 1.468575  | -1.336001 |
| 29 | 1  | 0 | -4.866598 | 2.055519  | -1.345510 |
| 30 | 1  | 0 | -3.107715 | 2.158684  | -1.185607 |
| 31 | 1  | 0 | -3.824718 | 1.010506  | -2.321890 |
| 32 | 6  | 0 | -4.151969 | 0.973257  | 1.714893  |
| 33 | 1  | 0 | -5.078419 | 1.552799  | 1.781853  |
| 34 | 1  | 0 | -4.164718 | 0.224639  | 2.511695  |
| 35 | 1  | 0 | -3.316128 | 1.651547  | 1.906896  |
| 36 | 6  | 0 | -5.418847 | -1.039853 | -0.272269 |
| 37 | 1  | 0 | -6.379288 | -0.514746 | -0.251725 |
| 38 | 1  | 0 | -5.325533 | -1.532881 | -1.243760 |
| 39 | 1  | 0 | -5.443322 | -1.816994 | 0.496473  |

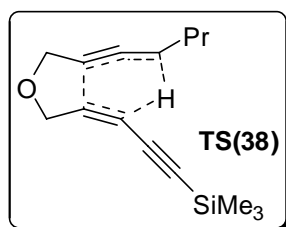

(Nimag=1) -369.7663

| Center Number | Atomic Number | Atomic Type | Coordinates (Angstroms) |   |   |
|---------------|---------------|-------------|-------------------------|---|---|
|               |               |             | X                       | Y | Z |

|    |    |   |           |           |           |
|----|----|---|-----------|-----------|-----------|
| 1  | 6  | 0 | 1.921153  | -1.482072 | 0.042683  |
| 2  | 6  | 0 | 0.730159  | -1.085216 | -0.050951 |
| 3  | 6  | 0 | 2.630039  | -2.767727 | 0.402291  |
| 4  | 1  | 0 | 2.576832  | -3.444683 | -0.464164 |
| 5  | 1  | 0 | 2.155831  | -3.247188 | 1.258691  |
| 6  | 6  | 0 | 4.480245  | -1.512882 | -0.132459 |
| 7  | 1  | 0 | 5.366850  | -1.076696 | 0.326404  |
| 8  | 1  | 0 | 4.758751  | -1.960337 | -1.098260 |
| 9  | 6  | 0 | 3.405542  | -0.491802 | -0.337568 |
| 10 | 6  | 0 | 3.169431  | 0.701091  | -0.652172 |
| 11 | 6  | 0 | 2.034123  | 1.550364  | -0.854179 |
| 12 | 1  | 0 | 1.197704  | 0.796975  | -0.635662 |
| 13 | 1  | 0 | 1.906807  | 1.829507  | -1.906842 |
| 14 | 8  | 0 | 3.975000  | -2.503174 | 0.747193  |
| 15 | 6  | 0 | 1.877494  | 2.773348  | 0.062430  |
| 16 | 6  | 0 | 0.523424  | 3.468485  | -0.114416 |
| 17 | 1  | 0 | 2.686991  | 3.481368  | -0.146080 |
| 18 | 1  | 0 | 2.000567  | 2.455679  | 1.103123  |
| 19 | 6  | 0 | 0.355301  | 4.687946  | 0.796053  |
| 20 | 1  | 0 | 0.408738  | 3.775001  | -1.161399 |
| 21 | 1  | 0 | -0.279553 | 2.749000  | 0.083099  |
| 22 | 1  | 0 | -0.618098 | 5.163564  | 0.648233  |
| 23 | 1  | 0 | 0.430526  | 4.406787  | 1.851077  |
| 24 | 1  | 0 | 1.125586  | 5.440191  | 0.598613  |
| 25 | 6  | 0 | -0.612695 | -0.942353 | -0.048329 |
| 26 | 6  | 0 | -1.832860 | -0.809852 | -0.045904 |
| 27 | 14 | 0 | -3.665138 | -0.645745 | -0.026030 |
| 28 | 6  | 0 | -4.194743 | 0.423151  | -1.487216 |
| 29 | 1  | 0 | -5.283629 | 0.535892  | -1.508927 |
| 30 | 1  | 0 | -3.754278 | 1.422145  | -1.427062 |
| 31 | 1  | 0 | -3.884348 | -0.022649 | -2.436278 |
| 32 | 6  | 0 | -4.168736 | 0.168494  | 1.598750  |
| 33 | 1  | 0 | -5.256050 | 0.285417  | 1.651954  |
| 34 | 1  | 0 | -3.852671 | -0.431816 | 2.456256  |
| 35 | 1  | 0 | -3.718605 | 1.159823  | 1.700145  |
| 36 | 6  | 0 | -4.431133 | -2.363254 | -0.165839 |
| 37 | 1  | 0 | -4.132867 | -2.853630 | -1.096588 |
| 38 | 1  | 0 | -4.119373 | -3.003077 | 0.664204  |
| 39 | 1  | 0 | -5.524246 | -2.301776 | -0.152710 |

---

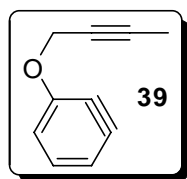

(Nimag=0)

| Center Number | Atomic Number | Atomic Type | Coordinates (Angstroms) |           |           |
|---------------|---------------|-------------|-------------------------|-----------|-----------|
|               |               |             | X                       | Y         | Z         |
| 1             | 6             | 0           | -2.983631               | -0.298654 | 0.798408  |
| 2             | 6             | 0           | -3.034440               | -1.259289 | -0.240682 |
| 3             | 6             | 0           | -1.910875               | -1.095528 | -1.009034 |
| 4             | 6             | 0           | -0.933481               | -0.321101 | -0.975073 |
| 5             | 6             | 0           | -0.840777               | 0.632862  | 0.036471  |
| 6             | 6             | 0           | -1.930032               | 0.610570  | 0.937423  |
| 7             | 1             | 0           | -3.794471               | -0.276323 | 1.519938  |
| 8             | 1             | 0           | -3.833553               | -1.976320 | -0.355240 |
| 9             | 1             | 0           | -1.931412               | 1.322679  | 1.754716  |
| 10            | 8             | 0           | 0.131576                | 1.557538  | 0.208310  |
| 11            | 6             | 0           | 1.281703                | 1.459066  | -0.651108 |
| 12            | 1             | 0           | 1.743678                | 2.446613  | -0.605979 |
| 13            | 1             | 0           | 0.945325                | 1.279261  | -1.678719 |
| 14            | 6             | 0           | 2.224977                | 0.428219  | -0.232870 |
| 15            | 6             | 0           | 3.019814                | -0.408933 | 0.108655  |
| 16            | 6             | 0           | 3.966159                | -1.435068 | 0.524630  |
| 17            | 1             | 0           | 3.840575                | -2.349744 | -0.061433 |
| 18            | 1             | 0           | 4.997025                | -1.091425 | 0.400136  |
| 19            | 1             | 0           | 3.823722                | -1.687908 | 1.579178  |

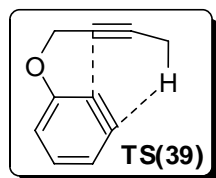

(Nimag=1) -283.0089

| Center Number | Atomic Number | Atomic Type | Coordinates (Angstroms) |           |           |
|---------------|---------------|-------------|-------------------------|-----------|-----------|
|               |               |             | X                       | Y         | Z         |
| 1             | 6             | 0           | -2.746140               | -0.607372 | -0.049126 |
| 2             | 6             | 0           | -1.950911               | -1.756972 | 0.096523  |
| 3             | 6             | 0           | -0.575505               | -1.510330 | 0.154670  |
| 4             | 6             | 0           | -0.122382               | -0.323193 | 0.103878  |
| 5             | 6             | 0           | -0.814265               | 0.858812  | -0.045977 |
| 6             | 6             | 0           | -2.202072               | 0.686306  | -0.117962 |

|    |   |   |           |           |           |
|----|---|---|-----------|-----------|-----------|
| 7  | 1 | 0 | -3.824739 | -0.716475 | -0.114480 |
| 8  | 1 | 0 | -2.399194 | -2.742439 | 0.142406  |
| 9  | 1 | 0 | -2.842162 | 1.553860  | -0.228135 |
| 10 | 8 | 0 | -0.186542 | 2.061183  | -0.139236 |
| 11 | 6 | 0 | 1.215757  | 1.978523  | 0.182747  |
| 12 | 1 | 0 | 1.350754  | 2.314205  | 1.216829  |
| 13 | 1 | 0 | 1.733471  | 2.668875  | -0.484306 |
| 14 | 6 | 0 | 1.734095  | 0.604725  | 0.035001  |
| 15 | 6 | 0 | 2.478318  | -0.361880 | -0.069071 |
| 16 | 6 | 0 | 2.807623  | -1.760477 | -0.126609 |
| 17 | 1 | 0 | 3.426526  | -2.086246 | 0.712469  |
| 18 | 1 | 0 | 1.818090  | -2.275784 | -0.050223 |
| 19 | 1 | 0 | 3.282481  | -2.054305 | -1.065115 |

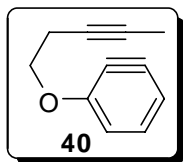

(Nimag=0)

| Center Number | Atomic Number | Atomic Type | Coordinates (Angstroms) |           |           |
|---------------|---------------|-------------|-------------------------|-----------|-----------|
|               |               |             | X                       | Y         | Z         |
| 1             | 6             | 0           | 3.272162                | 1.210517  | 0.506851  |
| 2             | 6             | 0           | 3.979989                | 0.518356  | -0.506686 |
| 3             | 6             | 0           | 3.141339                | -0.440767 | -1.011744 |
| 4             | 6             | 0           | 1.969330                | -0.794422 | -0.770202 |
| 5             | 6             | 0           | 1.237269                | -0.139295 | 0.220079  |
| 6             | 6             | 0           | 1.956084                | 0.898643  | 0.859371  |
| 7             | 1             | 0           | 3.777846                | 2.017033  | 1.028869  |
| 8             | 1             | 0           | 4.996398                | 0.746521  | -0.790564 |
| 9             | 1             | 0           | 1.455790                | 1.458024  | 1.641666  |
| 10            | 8             | 0           | -0.029026               | -0.395079 | 0.605537  |
| 11            | 6             | 0           | -0.705310               | -1.457716 | -0.074382 |
| 12            | 1             | 0           | -0.176223               | -2.398426 | 0.114620  |
| 13            | 1             | 0           | -0.699427               | -1.263246 | -1.151298 |
| 14            | 6             | 0           | -2.132797               | -1.540262 | 0.461359  |
| 15            | 1             | 0           | -2.582299               | -2.455964 | 0.059410  |
| 16            | 1             | 0           | -2.092587               | -1.663745 | 1.549093  |
| 17            | 6             | 0           | -2.967352               | -0.391434 | 0.116707  |
| 18            | 6             | 0           | -3.655577               | 0.551543  | -0.177695 |
| 19            | 6             | 0           | -4.483342               | 1.699608  | -0.528405 |
| 20            | 1             | 0           | -5.214365               | 1.440604  | -1.299899 |
| 21            | 1             | 0           | -5.032557               | 2.069337  | 0.342431  |

22 1 0 -3.871130 2.521868 -0.910140

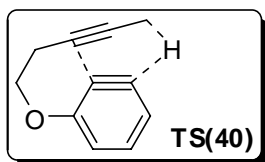

(Nimag=1) -257.2668

| Center Number | Atomic Number | Atomic Type | Coordinates (Angstroms) |           |           |
|---------------|---------------|-------------|-------------------------|-----------|-----------|
|               |               |             | X                       | Y         | Z         |
| 1             | 6             | 0           | -2.948096               | 0.347603  | -0.059157 |
| 2             | 6             | 0           | -2.275592               | 1.579636  | 0.035773  |
| 3             | 6             | 0           | -0.892674               | 1.449382  | 0.067692  |
| 4             | 6             | 0           | -0.272282               | 0.338808  | 0.030032  |
| 5             | 6             | 0           | -0.855100               | -0.913661 | -0.038183 |
| 6             | 6             | 0           | -2.260559               | -0.870563 | -0.091400 |
| 7             | 1             | 0           | -4.033225               | 0.336002  | -0.101266 |
| 8             | 1             | 0           | -2.814991               | 2.518254  | 0.070936  |
| 9             | 1             | 0           | -2.799667               | -1.809667 | -0.149407 |
| 10            | 8             | 0           | -0.223112               | -2.122981 | -0.075445 |
| 11            | 6             | 0           | 2.118917                | -1.342110 | -0.328203 |
| 12            | 1             | 0           | 2.035840                | -1.602537 | -1.388847 |
| 13            | 1             | 0           | 3.123323                | -1.634160 | -0.002512 |
| 14            | 6             | 0           | 1.965574                | 0.108020  | -0.154090 |
| 15            | 6             | 0           | 2.205018                | 1.303335  | -0.039173 |
| 16            | 6             | 0           | 1.885745                | 2.690363  | 0.091575  |
| 17            | 1             | 0           | 2.190245                | 3.288965  | -0.769881 |
| 18            | 1             | 0           | 0.749771                | 2.692279  | 0.130147  |
| 19            | 1             | 0           | 2.261239                | 3.145223  | 1.010845  |
| 20            | 6             | 0           | 1.098832                | -2.170367 | 0.463625  |
| 21            | 1             | 0           | 1.374724                | -3.224063 | 0.421670  |
| 22            | 1             | 0           | 1.078942                | -1.849124 | 1.510919  |

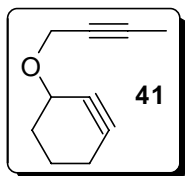

(Nimag=0)

| Center Number | Atomic Number | Atomic Type | Coordinates (Angstroms) |           |           |
|---------------|---------------|-------------|-------------------------|-----------|-----------|
|               |               |             | X                       | Y         | Z         |
| 1             | 6             | 0           | -2.111708               | -0.968610 | -0.236436 |



|    |   |   |           |           |           |
|----|---|---|-----------|-----------|-----------|
| 2  | 6 | 0 | -3.163587 | 0.072199  | 0.200728  |
| 3  | 6 | 0 | -2.814609 | 1.563067  | -0.173515 |
| 4  | 6 | 0 | -1.361965 | 1.604471  | 0.073425  |
| 5  | 6 | 0 | -0.500755 | 0.747245  | 0.146597  |
| 6  | 6 | 0 | -0.661941 | -0.725982 | 0.307013  |
| 7  | 1 | 0 | -2.031796 | -0.990497 | -1.327355 |
| 8  | 1 | 0 | -3.296358 | 0.019816  | 1.286410  |
| 9  | 1 | 0 | -3.406038 | 2.256212  | 0.429590  |
| 10 | 1 | 0 | -2.429307 | -1.965674 | 0.084611  |
| 11 | 1 | 0 | -4.127307 | -0.186944 | -0.250420 |
| 12 | 1 | 0 | -3.037619 | 1.769717  | -1.225004 |
| 13 | 6 | 0 | 1.498837  | -1.751643 | 0.128249  |
| 14 | 1 | 0 | 1.939970  | -2.572271 | -0.442253 |
| 15 | 1 | 0 | 1.407697  | -2.084167 | 1.172842  |
| 16 | 6 | 0 | 2.361925  | -0.571809 | 0.058251  |
| 17 | 6 | 0 | 3.085929  | 0.388740  | 0.001287  |
| 18 | 6 | 0 | 3.925839  | 1.576230  | -0.069594 |
| 19 | 1 | 0 | 4.630687  | 1.517222  | -0.903815 |
| 20 | 1 | 0 | 3.309930  | 2.469416  | -0.210693 |
| 21 | 1 | 0 | 4.501314  | 1.708546  | 0.851150  |
| 22 | 1 | 0 | -0.595919 | -0.988338 | 1.373067  |
| 23 | 8 | 0 | 0.198369  | -1.569560 | -0.431769 |

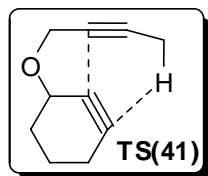

(Nimag=1) -343.8780

| Center Number | Atomic Number | Atomic Type | Coordinates (Angstroms) |           |           |
|---------------|---------------|-------------|-------------------------|-----------|-----------|
|               |               |             | X                       | Y         | Z         |
| 1             | 6             | 0           | 2.078477                | 0.803680  | -0.307471 |
| 2             | 6             | 0           | 2.729845                | -0.518327 | 0.155045  |
| 3             | 6             | 0           | 1.871402                | -1.792678 | -0.137171 |
| 4             | 6             | 0           | 0.435590                | -1.442535 | 0.105451  |
| 5             | 6             | 0           | 0.018250                | -0.280814 | 0.246373  |
| 6             | 6             | 0           | 0.699555                | 1.034768  | 0.352837  |
| 7             | 1             | 0           | 1.923875                | 0.796360  | -1.390644 |
| 8             | 1             | 0           | 2.912231                | -0.465201 | 1.234540  |
| 9             | 1             | 0           | 2.218199                | -2.627787 | 0.478159  |
| 10            | 1             | 0           | 2.736319                | 1.646159  | -0.072497 |
| 11            | 1             | 0           | 3.710570                | -0.621579 | -0.321876 |
| 12            | 1             | 0           | 1.991666                | -2.109304 | -1.179453 |

|    |   |   |           |           |           |
|----|---|---|-----------|-----------|-----------|
| 13 | 6 | 0 | -1.412285 | 1.948344  | 0.053269  |
| 14 | 1 | 0 | -1.983554 | 2.534814  | -0.667068 |
| 15 | 1 | 0 | -1.565357 | 2.375080  | 1.055151  |
| 16 | 6 | 0 | -1.843161 | 0.527277  | 0.047557  |
| 17 | 6 | 0 | -2.570368 | -0.462015 | -0.029945 |
| 18 | 6 | 0 | -2.728290 | -1.885929 | -0.092913 |
| 19 | 1 | 0 | -3.277880 | -2.307706 | 0.751718  |
| 20 | 1 | 0 | -3.170884 | -2.234359 | -1.028737 |
| 21 | 1 | 0 | -1.658602 | -2.253019 | -0.050548 |
| 22 | 1 | 0 | 0.815160  | 1.321764  | 1.409802  |
| 23 | 8 | 0 | -0.040729 | 2.044269  | -0.322093 |

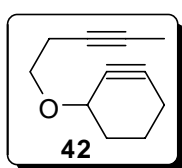

(Nimag=0)

| Center Number | Atomic Number | Atomic Type | Coordinates (Angstroms) |           |           |
|---------------|---------------|-------------|-------------------------|-----------|-----------|
|               |               |             | X                       | Y         | Z         |
| 1             | 6             | 0           | -2.489319               | -0.349718 | 1.066872  |
| 2             | 6             | 0           | -2.618847               | 1.174127  | 0.830060  |
| 3             | 6             | 0           | -2.906028               | 1.595432  | -0.660286 |
| 4             | 6             | 0           | -2.062649               | 0.650615  | -1.421056 |
| 5             | 6             | 0           | -1.520289               | -0.386234 | -1.093843 |
| 6             | 6             | 0           | -1.394592               | -1.101184 | 0.195888  |
| 7             | 1             | 0           | -3.452280               | -0.826250 | 0.859287  |
| 8             | 1             | 0           | -1.697530               | 1.672204  | 1.147146  |
| 9             | 1             | 0           | -2.662190               | 2.650328  | -0.808217 |
| 10            | 1             | 0           | -2.271652               | -0.524903 | 2.126633  |
| 11            | 1             | 0           | -3.423303               | 1.560214  | 1.465681  |
| 12            | 1             | 0           | -3.962443               | 1.468341  | -0.917678 |
| 13            | 1             | 0           | -1.673215               | -2.156351 | 0.121618  |
| 14            | 6             | 0           | 0.003467                | -1.048275 | 0.833167  |
| 15            | 1             | 0           | 0.354297                | -0.013759 | 0.923741  |
| 16            | 1             | 0           | -0.060969               | -1.473458 | 1.838836  |
| 17            | 8             | 0           | 0.956725                | -1.843501 | 0.140015  |
| 18            | 6             | 0           | 1.681029                | -1.178201 | -0.897935 |
| 19            | 1             | 0           | 0.992548                | -0.728528 | -1.623893 |
| 20            | 1             | 0           | 2.230104                | -1.971134 | -1.411182 |
| 21            | 6             | 0           | 2.615616                | -0.162434 | -0.405651 |
| 22            | 6             | 0           | 3.391963                | 0.671672  | -0.014256 |
| 23            | 6             | 0           | 4.333992                | 1.676502  | 0.462949  |

|    |   |   |          |          |          |
|----|---|---|----------|----------|----------|
| 24 | 1 | 0 | 5.350133 | 1.455256 | 0.123788 |
| 25 | 1 | 0 | 4.068166 | 2.674390 | 0.102292 |
| 26 | 1 | 0 | 4.348473 | 1.707851 | 1.556378 |

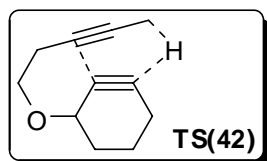

(Nimag=1) -353.9938

| Center Number | Atomic Number | Atomic Type | Coordinates (Angstroms) |           |           |
|---------------|---------------|-------------|-------------------------|-----------|-----------|
|               |               |             | X                       | Y         | Z         |
| 1             | 6             | 0           | 2.261442                | -0.642673 | 0.628566  |
| 2             | 6             | 0           | 2.760561                | 0.406749  | -0.384365 |
| 3             | 6             | 0           | 2.051486                | 1.786572  | -0.244700 |
| 4             | 6             | 0           | 0.590213                | 1.511751  | -0.079621 |
| 5             | 6             | 0           | 0.121522                | 0.396413  | 0.210013  |
| 6             | 6             | 0           | 0.711799                | -0.905825 | 0.588590  |
| 7             | 1             | 0           | 2.517688                | -0.310382 | 1.639691  |
| 8             | 1             | 0           | 2.597586                | 0.038983  | -1.403177 |
| 9             | 1             | 0           | 2.273132                | 2.412846  | -1.113987 |
| 10            | 1             | 0           | 2.786597                | -1.591100 | 0.467340  |
| 11            | 1             | 0           | 3.842503                | 0.532198  | -0.263368 |
| 12            | 1             | 0           | 2.425116                | 2.332834  | 0.629549  |
| 13            | 1             | 0           | 0.400903                | -1.180186 | 1.602727  |
| 14            | 6             | 0           | 0.324755                | -2.056644 | -0.356858 |
| 15            | 1             | 0           | 0.880399                | -1.978324 | -1.294604 |
| 16            | 1             | 0           | 0.586237                | -3.013824 | 0.117340  |
| 17            | 8             | 0           | -1.053455               | -2.078275 | -0.740418 |
| 18            | 6             | 0           | -1.978759               | -1.541712 | 0.196132  |
| 19            | 1             | 0           | -1.798441               | -1.936150 | 1.204959  |
| 20            | 1             | 0           | -2.962644               | -1.890367 | -0.122596 |
| 21            | 6             | 0           | -1.967574               | -0.061790 | 0.197864  |
| 22            | 6             | 0           | -2.428042               | 1.076685  | 0.101983  |
| 23            | 6             | 0           | -2.244007               | 2.480805  | -0.058937 |
| 24            | 1             | 0           | -2.663614               | 2.875114  | -0.987062 |
| 25            | 1             | 0           | -2.579519               | 3.081356  | 0.789555  |
| 26            | 1             | 0           | -1.098692               | 2.551229  | -0.135018 |

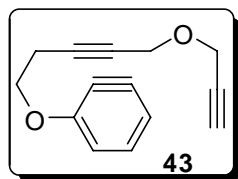

(Nimag=0)

| Center Number | Atomic Number | Atomic Type | Coordinates (Angstroms) |           |           |
|---------------|---------------|-------------|-------------------------|-----------|-----------|
|               |               |             | X                       | Y         | Z         |
| 1             | 6             | 0           | 4.677586                | -1.645051 | -0.738227 |
| 2             | 6             | 0           | 5.407804                | -1.434427 | 0.457568  |
| 3             | 6             | 0           | 4.779536                | -0.433718 | 1.151581  |
| 4             | 6             | 0           | 3.770525                | 0.272450  | 0.950691  |
| 5             | 6             | 0           | 3.023897                | 0.096489  | -0.213913 |
| 6             | 6             | 0           | 3.532903                | -0.912553 | -1.065190 |
| 7             | 1             | 0           | 5.025963                | -2.409166 | -1.426247 |
| 8             | 1             | 0           | 6.293450                | -1.991062 | 0.724988  |
| 9             | 1             | 0           | 3.007303                | -1.110632 | -1.992387 |
| 10            | 8             | 0           | 1.915773                | 0.770986  | -0.584606 |
| 11            | 6             | 0           | 0.156958                | 2.364887  | -0.254079 |
| 12            | 1             | 0           | 0.349533                | 2.731640  | -1.268022 |
| 13            | 1             | 0           | -0.109578               | 3.240008  | 0.349811  |
| 14            | 6             | 0           | -0.964726               | 1.430961  | -0.266906 |
| 15            | 6             | 0           | -1.894073               | 0.666840  | -0.255245 |
| 16            | 6             | 0           | -3.003451               | -0.274000 | -0.278421 |
| 17            | 1             | 0           | -3.621303               | -0.104343 | -1.170143 |
| 18            | 1             | 0           | -2.618092               | -1.303635 | -0.334001 |
| 19            | 6             | 0           | 1.448500                | 1.781573  | 0.314359  |
| 20            | 1             | 0           | 2.209394                | 2.564860  | 0.402838  |
| 21            | 1             | 0           | 1.280730                | 1.342936  | 1.302701  |
| 22            | 8             | 0           | -3.794874               | -0.119948 | 0.902763  |
| 23            | 6             | 0           | -4.856868               | -1.058773 | 0.991446  |
| 24            | 1             | 0           | -4.467166               | -2.086299 | 0.934420  |
| 25            | 1             | 0           | -5.285299               | -0.921711 | 1.986686  |
| 26            | 6             | 0           | -5.900832               | -0.879588 | -0.023552 |
| 27            | 6             | 0           | -6.762440               | -0.734781 | -0.849576 |
| 28            | 1             | 0           | -7.524034               | -0.602755 | -1.579135 |

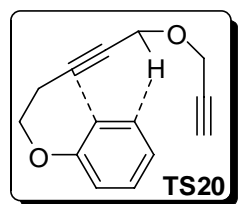

(Nimag=1) -265.9807

| Center Number | Atomic Number | Atomic Type | Coordinates (Angstroms) |           |           |
|---------------|---------------|-------------|-------------------------|-----------|-----------|
|               |               |             | X                       | Y         | Z         |
| 1             | 6             | 0           | -1.659312               | 2.932719  | -0.056451 |
| 2             | 6             | 0           | -0.322906               | 2.588373  | 0.220571  |
| 3             | 6             | 0           | -0.120864               | 1.217075  | 0.280520  |
| 4             | 6             | 0           | -1.023269               | 0.337369  | 0.120432  |
| 5             | 6             | 0           | -2.359991               | 0.592974  | -0.123718 |
| 6             | 6             | 0           | -2.657179               | 1.964793  | -0.220197 |
| 7             | 1             | 0           | -1.930704               | 3.981053  | -0.138260 |
| 8             | 1             | 0           | 0.442371                | 3.341858  | 0.358717  |
| 9             | 1             | 0           | -3.683295               | 2.255814  | -0.415815 |
| 10            | 8             | 0           | -3.355592               | -0.327265 | -0.282417 |
| 11            | 6             | 0           | -1.986647               | -2.400982 | -0.305583 |
| 12            | 1             | 0           | -2.123244               | -2.416023 | -1.392163 |
| 13            | 1             | 0           | -2.058729               | -3.436854 | 0.043388  |
| 14            | 6             | 0           | -0.648417               | -1.883709 | 0.008748  |
| 15            | 6             | 0           | 0.550842                | -1.838123 | 0.252817  |
| 16            | 6             | 0           | 1.778458                | -1.157086 | 0.539203  |
| 17            | 1             | 0           | 1.446130                | -0.064387 | 0.578865  |
| 18            | 1             | 0           | 2.188045                | -1.415162 | 1.526019  |
| 19            | 6             | 0           | -3.135749               | -1.601553 | 0.324241  |
| 20            | 1             | 0           | -4.071095               | -2.141810 | 0.178836  |
| 21            | 1             | 0           | -2.965055               | -1.470340 | 1.398534  |
| 22            | 8             | 0           | 2.750777                | -1.354657 | -0.477404 |
| 23            | 6             | 0           | 4.032296                | -0.827843 | -0.158085 |
| 24            | 1             | 0           | 4.382091                | -1.236470 | 0.801581  |
| 25            | 1             | 0           | 4.698275                | -1.200616 | -0.939324 |
| 26            | 6             | 0           | 4.096078                | 0.635379  | -0.114116 |
| 27            | 6             | 0           | 4.171024                | 1.834440  | -0.079771 |
| 28            | 1             | 0           | 4.227528                | 2.895361  | -0.053482 |

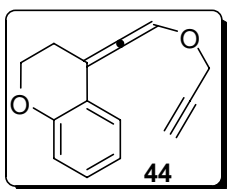

(Nimag=0)

| Center Number | Atomic Number | Atomic Type | Coordinates (Angstroms) |          |           |
|---------------|---------------|-------------|-------------------------|----------|-----------|
|               |               |             | X                       | Y        | Z         |
| 1             | 6             | 0           | -2.938978               | 2.484482 | -0.119441 |
| 2             | 6             | 0           | -1.548852               | 2.645000 | -0.108717 |

|    |   |   |           |           |           |
|----|---|---|-----------|-----------|-----------|
| 3  | 6 | 0 | -0.731075 | 1.526977  | -0.062584 |
| 4  | 6 | 0 | -1.264817 | 0.228215  | -0.020648 |
| 5  | 6 | 0 | -2.666017 | 0.089698  | -0.016823 |
| 6  | 6 | 0 | -3.494737 | 1.214517  | -0.071848 |
| 7  | 1 | 0 | -3.588100 | 3.351956  | -0.160524 |
| 8  | 1 | 0 | -1.112640 | 3.636219  | -0.145642 |
| 9  | 1 | 0 | -4.567667 | 1.064235  | -0.069170 |
| 10 | 8 | 0 | -3.294157 | -1.124519 | 0.024923  |
| 11 | 6 | 0 | -1.162961 | -2.278167 | -0.267713 |
| 12 | 1 | 0 | -1.346138 | -2.393146 | -1.342606 |
| 13 | 1 | 0 | -0.575728 | -3.135976 | 0.064609  |
| 14 | 6 | 0 | -0.410095 | -0.980621 | -0.022656 |
| 15 | 6 | 0 | 0.891429  | -0.958651 | 0.152980  |
| 16 | 6 | 0 | 2.178885  | -0.976171 | 0.361866  |
| 17 | 1 | 0 | 0.347545  | 1.637365  | -0.072619 |
| 18 | 1 | 0 | 2.600847  | -1.057038 | 1.362982  |
| 19 | 6 | 0 | -2.498495 | -2.233554 | 0.461034  |
| 20 | 1 | 0 | -3.101880 | -3.118716 | 0.258712  |
| 21 | 1 | 0 | -2.344444 | -2.151576 | 1.544528  |
| 22 | 8 | 0 | 3.103402  | -0.930310 | -0.664483 |
| 23 | 6 | 0 | 4.431809  | -0.590398 | -0.263797 |
| 24 | 1 | 0 | 4.756030  | -1.241536 | 0.559168  |
| 25 | 1 | 0 | 5.057075  | -0.811778 | -1.130585 |
| 26 | 6 | 0 | 4.587863  | 0.811824  | 0.123396  |
| 27 | 6 | 0 | 4.720568  | 1.962933  | 0.442533  |
| 28 | 1 | 0 | 4.833997  | 2.982114  | 0.722142  |

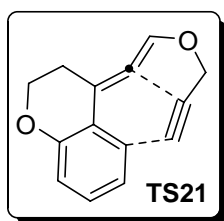

(Nimag=1) -314.8254

| Center Number | Atomic Number | Atomic Type | Coordinates (Angstroms) |           |           |
|---------------|---------------|-------------|-------------------------|-----------|-----------|
|               |               |             | X                       | Y         | Z         |
| 1             | 6             | 0           | -3.074030               | -1.834848 | -0.116628 |
| 2             | 6             | 0           | -1.865831               | -2.284599 | -0.640384 |
| 3             | 6             | 0           | -0.779672               | -1.414995 | -0.723232 |
| 4             | 6             | 0           | -0.882160               | -0.069303 | -0.293204 |
| 5             | 6             | 0           | -2.149574               | 0.370039  | 0.189424  |
| 6             | 6             | 0           | -3.219349               | -0.505957 | 0.291313  |
| 7             | 1             | 0           | -3.921760               | -2.507331 | -0.047388 |

|    |   |   |           |           |           |
|----|---|---|-----------|-----------|-----------|
| 8  | 1 | 0 | -1.769106 | -3.305016 | -0.992557 |
| 9  | 1 | 0 | -4.161640 | -0.133030 | 0.674202  |
| 10 | 8 | 0 | -2.350895 | 1.660668  | 0.583669  |
| 11 | 6 | 0 | -0.010719 | 2.234974  | 0.212667  |
| 12 | 1 | 0 | 0.224377  | 2.320869  | 1.281641  |
| 13 | 1 | 0 | 0.643460  | 2.938042  | -0.312297 |
| 14 | 6 | 0 | 0.247448  | 0.814443  | -0.254876 |
| 15 | 6 | 0 | 1.535379  | 0.350224  | -0.367352 |
| 16 | 6 | 0 | 2.694746  | 0.724422  | -0.924676 |
| 17 | 1 | 0 | 0.139505  | -1.738094 | -1.190527 |
| 18 | 1 | 0 | 2.825723  | 1.321362  | -1.817839 |
| 19 | 6 | 0 | -1.463400 | 2.617501  | -0.015168 |
| 20 | 1 | 0 | -1.711835 | 3.572671  | 0.446823  |
| 21 | 1 | 0 | -1.686301 | 2.673971  | -1.087983 |
| 22 | 8 | 0 | 3.848801  | 0.193005  | -0.447925 |
| 23 | 6 | 0 | 3.540936  | -0.565690 | 0.726146  |
| 24 | 1 | 0 | 4.256575  | -1.382171 | 0.792379  |
| 25 | 1 | 0 | 3.631750  | 0.088674  | 1.599524  |
| 26 | 6 | 0 | 2.112380  | -1.053808 | 0.617378  |
| 27 | 6 | 0 | 1.452523  | -2.035939 | 1.015287  |
| 28 | 1 | 0 | 0.713949  | -2.758117 | 1.267903  |

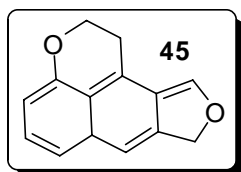

(Nimag=0)

| Center Number | Atomic Number | Atomic Type | Coordinates (Angstroms) |           |           |
|---------------|---------------|-------------|-------------------------|-----------|-----------|
|               |               |             | X                       | Y         | Z         |
| 1             | 6             | 0           | 2.694353                | -2.054203 | -0.367037 |
| 2             | 6             | 0           | 1.453475                | -2.460035 | -0.051533 |
| 3             | 6             | 0           | 0.457101                | -1.485049 | 0.535310  |
| 4             | 6             | 0           | 0.765703                | -0.033981 | 0.172250  |
| 5             | 6             | 0           | 2.165933                | 0.299899  | -0.028428 |
| 6             | 6             | 0           | 3.093066                | -0.663582 | -0.263928 |
| 7             | 1             | 0           | 3.428778                | -2.769147 | -0.723029 |
| 8             | 1             | 0           | 1.160400                | -3.501300 | -0.130487 |
| 9             | 1             | 0           | 4.113432                | -0.370234 | -0.478388 |
| 10            | 8             | 0           | 2.533966                | 1.613225  | -0.139059 |
| 11            | 6             | 0           | 0.208520                | 2.353944  | -0.175453 |
| 12            | 1             | 0           | 0.185607                | 2.618033  | -1.240241 |
| 13            | 1             | 0           | -0.489312               | 3.027520  | 0.335163  |

|    |   |   |           |           |           |
|----|---|---|-----------|-----------|-----------|
| 14 | 6 | 0 | -0.198189 | 0.915908  | 0.024446  |
| 15 | 6 | 0 | -1.579334 | 0.505961  | 0.006248  |
| 16 | 6 | 0 | -2.740790 | 1.181964  | -0.144416 |
| 17 | 1 | 0 | 0.616115  | -1.549328 | 1.633564  |
| 18 | 1 | 0 | -2.938395 | 2.240440  | -0.227259 |
| 19 | 6 | 0 | 1.605048  | 2.567418  | 0.392399  |
| 20 | 1 | 0 | 2.013303  | 3.542270  | 0.126420  |
| 21 | 1 | 0 | 1.586831  | 2.478394  | 1.485773  |
| 22 | 8 | 0 | -3.848926 | 0.390538  | -0.200836 |
| 23 | 6 | 0 | -3.405381 | -0.997029 | -0.128944 |
| 24 | 1 | 0 | -3.937158 | -1.471476 | 0.698420  |
| 25 | 1 | 0 | -3.693203 | -1.482269 | -1.065479 |
| 26 | 6 | 0 | -1.909997 | -0.917432 | 0.071101  |
| 27 | 6 | 0 | -0.989385 | -1.860334 | 0.285156  |
| 28 | 1 | 0 | -1.247448 | -2.913689 | 0.341677  |

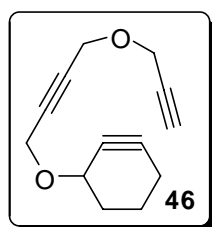

(Nimag=0)

| Center Number | Atomic Number | Atomic Type | Coordinates (Angstroms) |           |           |
|---------------|---------------|-------------|-------------------------|-----------|-----------|
|               |               |             | X                       | Y         | Z         |
| 1             | 6             | 0           | -3.840888               | -0.184771 | -0.614799 |
| 2             | 6             | 0           | -4.514320               | 1.075253  | -0.032995 |
| 3             | 6             | 0           | -3.569949               | 2.332015  | 0.094698  |
| 4             | 6             | 0           | -2.306199               | 1.711041  | 0.525171  |
| 5             | 6             | 0           | -1.849670               | 0.584520  | 0.459459  |
| 6             | 6             | 0           | -2.576343               | -0.684803 | 0.162150  |
| 7             | 1             | 0           | -3.518929               | -0.001311 | -1.644108 |
| 8             | 1             | 0           | -4.909291               | 0.848786  | 0.962827  |
| 9             | 1             | 0           | -3.992217               | 3.056389  | 0.795254  |
| 10            | 1             | 0           | -4.564997               | -1.005027 | -0.643558 |
| 11            | 1             | 0           | -5.370244               | 1.342729  | -0.661607 |
| 12            | 1             | 0           | -3.449424               | 2.836727  | -0.868920 |
| 13            | 6             | 0           | -0.918916               | -2.404519 | -0.029131 |
| 14            | 1             | 0           | -0.726090               | -3.243287 | -0.702263 |
| 15            | 1             | 0           | -1.299014               | -2.817627 | 0.916557  |
| 16            | 6             | 0           | 0.329973                | -1.682533 | 0.213424  |
| 17            | 6             | 0           | 1.380537                | -1.125588 | 0.399661  |
| 18            | 6             | 0           | 2.609997                | -0.395104 | 0.658786  |



|    |   |   |           |           |           |
|----|---|---|-----------|-----------|-----------|
| 19 | 1 | 0 | 2.415843  | 0.683078  | 0.582371  |
| 20 | 1 | 0 | 2.958394  | -0.597331 | 1.683292  |
| 21 | 1 | 0 | -2.865052 | -1.168381 | 1.107044  |
| 22 | 8 | 0 | -1.936174 | -1.635751 | -0.665633 |
| 23 | 8 | 0 | 3.616794  | -0.785846 | -0.277554 |
| 24 | 6 | 0 | 4.871824  | -0.163180 | -0.043071 |
| 25 | 1 | 0 | 5.218523  | -0.371307 | 0.980459  |
| 26 | 1 | 0 | 5.568789  | -0.643602 | -0.733147 |
| 27 | 6 | 0 | 4.872930  | 1.285968  | -0.269406 |
| 28 | 6 | 0 | 4.879116  | 2.473417  | -0.457516 |
| 29 | 1 | 0 | 4.880195  | 3.522641  | -0.627286 |

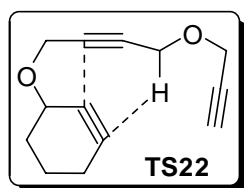

(Nimag=1) -353.1252

| Center Number | Atomic Number | Atomic Type | Coordinates (Angstroms) |           |           |
|---------------|---------------|-------------|-------------------------|-----------|-----------|
|               |               |             | X                       | Y         | Z         |
| 1             | 6             | 0           | -3.188051               | 0.946124  | -0.547860 |
| 2             | 6             | 0           | -2.728745               | 2.282546  | 0.076569  |
| 3             | 6             | 0           | -1.174512               | 2.477560  | 0.115664  |
| 4             | 6             | 0           | -0.577688               | 1.145908  | 0.424533  |
| 5             | 6             | 0           | -1.169876               | 0.057713  | 0.393320  |
| 6             | 6             | 0           | -2.607236               | -0.277612 | 0.198150  |
| 7             | 1             | 0           | -2.862778               | 0.877529  | -1.590207 |
| 8             | 1             | 0           | -3.108085               | 2.344113  | 1.102843  |
| 9             | 1             | 0           | -0.911498               | 3.249475  | 0.844274  |
| 10            | 1             | 0           | -4.280978               | 0.888513  | -0.537559 |
| 11            | 1             | 0           | -3.183880               | 3.111861  | -0.475392 |
| 12            | 1             | 0           | -0.801155               | 2.825889  | -0.853666 |
| 13            | 6             | 0           | -1.853115               | -2.453345 | -0.042705 |
| 14            | 1             | 0           | -1.788585               | -3.253928 | -0.780061 |
| 15            | 1             | 0           | -2.242620               | -2.869115 | 0.897908  |
| 16            | 6             | 0           | -0.515324               | -1.852083 | 0.196278  |
| 17            | 6             | 0           | 0.710284                | -1.811610 | 0.315236  |
| 18            | 6             | 0           | 1.877936                | -1.004219 | 0.552678  |
| 19            | 1             | 0           | 2.348144                | -1.223115 | 1.522260  |
| 20            | 1             | 0           | 1.443402                | 0.039831  | 0.602767  |
| 21            | 1             | 0           | -3.100886               | -0.412231 | 1.173338  |
| 22            | 8             | 0           | -2.744683               | -1.471395 | -0.559893 |
| 23            | 8             | 0           | 2.831294                | -1.112653 | -0.497426 |

|    |   |   |          |           |           |
|----|---|---|----------|-----------|-----------|
| 24 | 6 | 0 | 4.065311 | -0.465813 | -0.219923 |
| 25 | 1 | 0 | 4.485292 | -0.838264 | 0.726447  |
| 26 | 1 | 0 | 4.738571 | -0.771668 | -1.023754 |
| 27 | 6 | 0 | 3.990016 | 0.997447  | -0.171761 |
| 28 | 6 | 0 | 3.949315 | 2.198099  | -0.132261 |
| 29 | 1 | 0 | 3.902273 | 3.259208  | -0.098157 |

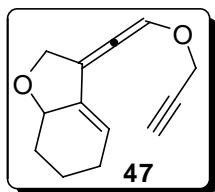

47

(Nimag=0)

| Center Number | Atomic Number | Atomic Type | Coordinates (Angstroms) |           |           |
|---------------|---------------|-------------|-------------------------|-----------|-----------|
|               |               |             | X                       | Y         | Z         |
| 1             | 6             | 0           | 3.811416                | 0.147307  | 0.378070  |
| 2             | 6             | 0           | 3.787773                | 1.617933  | -0.074803 |
| 3             | 6             | 0           | 2.448270                | 2.311426  | 0.243425  |
| 4             | 6             | 0           | 1.250754                | 1.412720  | 0.079832  |
| 5             | 6             | 0           | 1.367529                | 0.111069  | -0.196045 |
| 6             | 6             | 0           | 2.701522                | -0.588920 | -0.351837 |
| 7             | 1             | 0           | 3.632349                | 0.070213  | 1.455606  |
| 8             | 1             | 0           | 3.966976                | 1.656945  | -1.155748 |
| 9             | 1             | 0           | 2.334007                | 3.207905  | -0.378013 |
| 10            | 1             | 0           | 4.782786                | -0.308953 | 0.169370  |
| 11            | 1             | 0           | 4.608210                | 2.168967  | 0.392753  |
| 12            | 1             | 0           | 2.453066                | 2.679134  | 1.279469  |
| 13            | 6             | 0           | 1.131357                | -2.263358 | -0.196245 |
| 14            | 1             | 0           | 0.751256                | -2.972843 | 0.538876  |
| 15            | 1             | 0           | 1.120355                | -2.736795 | -1.189144 |
| 16            | 6             | 0           | 0.344087                | -0.950171 | -0.227076 |
| 17            | 6             | 0           | -0.958936               | -0.836554 | -0.267284 |
| 18            | 6             | 0           | -2.257066               | -0.733246 | -0.359678 |
| 19            | 1             | 0           | 0.267818                | 1.840113  | 0.261599  |
| 20            | 1             | 0           | -2.764311               | -0.700069 | -1.322231 |
| 21            | 1             | 0           | 2.957997                | -0.677248 | -1.421954 |
| 22            | 8             | 0           | 2.463822                | -1.902295 | 0.169617  |
| 23            | 8             | 0           | -3.080257               | -0.665982 | 0.747297  |
| 24            | 6             | 0           | -4.466942               | -0.477503 | 0.461736  |
| 25            | 1             | 0           | -4.816665               | -1.244257 | -0.242054 |
| 26            | 1             | 0           | -4.976960               | -0.641120 | 1.412720  |
| 27            | 6             | 0           | -4.786019               | 0.853525  | -0.055649 |
| 28            | 6             | 0           | -5.056348               | 1.944532  | -0.481313 |

29 1 0 -5.289784 2.911657 -0.855352

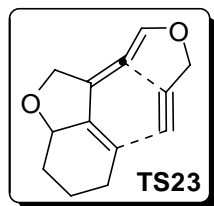

(Nimag=1) -463.1394

| Center Number | Atomic Number | Atomic Type | Coordinates (Angstroms) |           |           |
|---------------|---------------|-------------|-------------------------|-----------|-----------|
|               |               |             | X                       | Y         | Z         |
| 1             | 6             | 0           | -2.938417               | 0.159448  | 0.780317  |
| 2             | 6             | 0           | -3.373822               | -1.021426 | -0.105508 |
| 3             | 6             | 0           | -2.189447               | -1.890461 | -0.585607 |
| 4             | 6             | 0           | -0.909709               | -1.122281 | -0.825025 |
| 5             | 6             | 0           | -0.827856               | 0.218530  | -0.571003 |
| 6             | 6             | 0           | -1.993417               | 1.025640  | -0.035928 |
| 7             | 1             | 0           | -2.414350               | -0.191709 | 1.675107  |
| 8             | 1             | 0           | -3.901053               | -0.622152 | -0.979646 |
| 9             | 1             | 0           | -2.472465               | -2.424933 | -1.500213 |
| 10            | 1             | 0           | -3.807427               | 0.736201  | 1.108659  |
| 11            | 1             | 0           | -4.095535               | -1.647009 | 0.426398  |
| 12            | 1             | 0           | -1.989621               | -2.679545 | 0.151669  |
| 13            | 6             | 0           | -0.104757               | 2.343309  | 0.143249  |
| 14            | 1             | 0           | 0.564373                | 2.696069  | 0.929235  |
| 15            | 1             | 0           | -0.185805               | 3.126472  | -0.627180 |
| 16            | 6             | 0           | 0.333921                | 1.020320  | -0.472451 |
| 17            | 6             | 0           | 1.600913                | 0.544973  | -0.520146 |
| 18            | 6             | 0           | 2.868101                | 0.629963  | -0.886974 |
| 19            | 1             | 0           | -0.121662               | -1.617266 | -1.375984 |
| 20            | 1             | 0           | 3.252578                | 1.174700  | -1.739960 |
| 21            | 1             | 0           | -2.551586               | 1.471281  | -0.877733 |
| 22            | 8             | 0           | -1.389335               | 2.081064  | 0.719021  |
| 23            | 8             | 0           | 3.830371                | -0.097768 | -0.245957 |
| 24            | 6             | 0           | 3.263430                | -0.777322 | 0.881354  |
| 25            | 1             | 0           | 3.881727                | -1.657264 | 1.056911  |
| 26            | 1             | 0           | 3.310077                | -0.114552 | 1.753301  |
| 27            | 6             | 0           | 1.845453                | -1.136516 | 0.619746  |
| 28            | 6             | 0           | 0.884460                | -1.896942 | 0.770361  |
| 29            | 1             | 0           | 0.249347                | -2.700063 | 1.060620  |

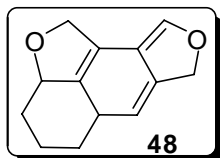

(Nimag=0)

| Center Number | Atomic Number | Atomic Type | Coordinates (Angstroms) |           |           |
|---------------|---------------|-------------|-------------------------|-----------|-----------|
|               |               |             | X                       | Y         | Z         |
| 1             | 6             | 0           | -3.037800               | 0.136546  | 0.549506  |
| 2             | 6             | 0           | -3.037330               | -1.382223 | 0.288256  |
| 3             | 6             | 0           | -1.631147               | -1.997216 | 0.407131  |
| 4             | 6             | 0           | -0.626067               | -1.331520 | -0.577599 |
| 5             | 6             | 0           | -0.759393               | 0.154805  | -0.446565 |
| 6             | 6             | 0           | -2.091573               | 0.834804  | -0.436234 |
| 7             | 1             | 0           | -2.681572               | 0.340695  | 1.565068  |
| 8             | 1             | 0           | -3.438151               | -1.582713 | -0.714178 |
| 9             | 1             | 0           | -1.670469               | -3.075218 | 0.217941  |
| 10            | 1             | 0           | -4.047884               | 0.548216  | 0.467501  |
| 11            | 1             | 0           | -3.714935               | -1.875362 | 0.991557  |
| 12            | 1             | 0           | -1.257621               | -1.863491 | 1.428672  |
| 13            | 6             | 0           | -0.379655               | 2.397838  | 0.019665  |
| 14            | 1             | 0           | -0.140292               | 2.838174  | 0.995351  |
| 15            | 1             | 0           | -0.058664               | 3.104924  | -0.758180 |
| 16            | 6             | 0           | 0.215618                | 1.026935  | -0.161259 |
| 17            | 6             | 0           | 1.570431                | 0.556438  | -0.015500 |
| 18            | 6             | 0           | 2.762220                | 1.129172  | 0.244875  |
| 19            | 1             | 0           | -0.948488               | -1.629465 | -1.590377 |
| 20            | 1             | 0           | 3.030859                | 2.163088  | 0.403884  |
| 21            | 1             | 0           | -2.554521               | 0.834822  | -1.436611 |
| 22            | 8             | 0           | -1.801072               | 2.195468  | -0.067906 |
| 23            | 8             | 0           | 3.804521                | 0.249594  | 0.320611  |
| 24            | 6             | 0           | 3.272019                | -1.085908 | 0.085234  |
| 25            | 1             | 0           | 3.787304                | -1.497371 | -0.786222 |
| 26            | 1             | 0           | 3.508619                | -1.695287 | 0.960802  |
| 27            | 6             | 0           | 1.788376                | -0.889731 | -0.132231 |
| 28            | 6             | 0           | 0.810682                | -1.772453 | -0.378134 |
| 29            | 1             | 0           | 1.019945                | -2.836425 | -0.449720 |

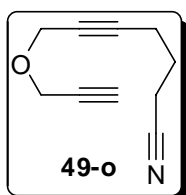

(Nimag=0)

| Center Number | Atomic Number | Atomic Type | Coordinates (Angstroms) |           |           |
|---------------|---------------|-------------|-------------------------|-----------|-----------|
|               |               |             | X                       | Y         | Z         |
| 1             | 6             | 0           | -3.145629               | 1.400555  | -0.227222 |
| 2             | 6             | 0           | -2.647185               | 2.491852  | -0.152671 |
| 3             | 1             | 0           | -2.193588               | 3.450350  | -0.085301 |
| 4             | 6             | 0           | -3.835410               | 0.110469  | -0.319998 |
| 5             | 1             | 0           | -3.797351               | -0.255888 | -1.354887 |
| 6             | 1             | 0           | -4.888068               | 0.258761  | -0.063166 |
| 7             | 6             | 0           | -2.325152               | -1.729798 | 0.068613  |
| 8             | 1             | 0           | -2.248942               | -2.544650 | 0.792387  |
| 9             | 1             | 0           | -2.643304               | -2.167514 | -0.888887 |
| 10            | 6             | 0           | -1.019480               | -1.090361 | -0.097121 |
| 11            | 6             | 0           | 0.067141                | -0.592433 | -0.243930 |
| 12            | 6             | 0           | 1.372140                | 0.041022  | -0.394633 |
| 13            | 6             | 0           | 2.197817                | 0.022952  | 0.905958  |
| 14            | 1             | 0           | 1.226587                | 1.077484  | -0.723919 |
| 15            | 1             | 0           | 1.930426                | -0.459784 | -1.193693 |
| 16            | 6             | 0           | 3.562598                | 0.726010  | 0.764598  |
| 17            | 1             | 0           | 1.637951                | 0.526470  | 1.697927  |
| 18            | 1             | 0           | 2.349668                | -1.010168 | 1.227838  |
| 19            | 1             | 0           | 4.075206                | 0.742853  | 1.730799  |
| 20            | 1             | 0           | 3.426195                | 1.769342  | 0.460512  |
| 21            | 6             | 0           | 4.447126                | 0.081546  | -0.205567 |
| 22            | 7             | 0           | 5.133428                | -0.438216 | -0.973066 |
| 23            | 8             | 0           | -3.356570               | -0.886329 | 0.577961  |

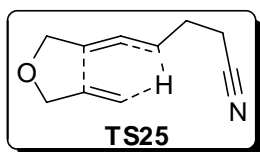

(Nimag=1) -772.3455

| Center Number | Atomic Number | Atomic Type | Coordinates (Angstroms) |           |           |
|---------------|---------------|-------------|-------------------------|-----------|-----------|
|               |               |             | X                       | Y         | Z         |
| 1             | 6             | 0           | -1.669940               | 1.113814  | -0.080283 |
| 2             | 6             | 0           | -0.607694               | 1.765594  | -0.091018 |
| 3             | 1             | 0           | -0.090990               | 2.701810  | -0.048787 |
| 4             | 6             | 0           | -3.160515               | 1.073840  | -0.051677 |
| 5             | 1             | 0           | -3.532551               | 1.302516  | -1.061855 |
| 6             | 1             | 0           | -3.550867               | 1.819518  | 0.642121  |
| 7             | 6             | 0           | -2.941634               | -1.234671 | -0.256129 |
| 8             | 1             | 0           | -3.151021               | -2.148935 | 0.300270  |

|    |   |   |           |           |           |
|----|---|---|-----------|-----------|-----------|
| 9  | 1 | 0 | -3.293739 | -1.362268 | -1.290689 |
| 10 | 6 | 0 | -1.501677 | -0.906283 | -0.248176 |
| 11 | 6 | 0 | -0.284357 | -1.152145 | -0.290826 |
| 12 | 6 | 0 | 0.967107  | -0.515006 | -0.286907 |
| 13 | 6 | 0 | 1.904855  | -0.746984 | 0.900461  |
| 14 | 1 | 0 | 0.505666  | 0.641203  | -0.214925 |
| 15 | 1 | 0 | 1.490127  | -0.537625 | -1.247841 |
| 16 | 6 | 0 | 3.067978  | 0.264633  | 0.960738  |
| 17 | 1 | 0 | 1.337362  | -0.668050 | 1.830972  |
| 18 | 1 | 0 | 2.313022  | -1.760226 | 0.855933  |
| 19 | 1 | 0 | 3.670549  | 0.083029  | 1.855405  |
| 20 | 1 | 0 | 2.682206  | 1.285791  | 1.039192  |
| 21 | 6 | 0 | 3.952968  | 0.198327  | -0.201410 |
| 22 | 7 | 0 | 4.643280  | 0.134487  | -1.123160 |
| 23 | 8 | 0 | -3.655659 | -0.183110 | 0.384212  |

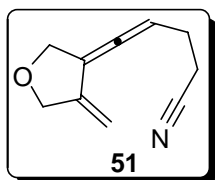

(Nimag=0)

| Center Number | Atomic Number | Atomic Type | Coordinates (Angstroms) |           |           |
|---------------|---------------|-------------|-------------------------|-----------|-----------|
|               |               |             | X                       | Y         | Z         |
| 1             | 6             | 0           | -2.107647               | 0.956851  | -0.042502 |
| 2             | 6             | 0           | -1.634008               | 2.198443  | 0.070782  |
| 3             | 1             | 0           | -2.296294               | 3.043576  | 0.220033  |
| 4             | 6             | 0           | -3.567594               | 0.541269  | -0.001784 |
| 5             | 1             | 0           | -4.046589               | 0.724968  | -0.975869 |
| 6             | 1             | 0           | -4.144109               | 1.046882  | 0.773777  |
| 7             | 6             | 0           | -2.395679               | -1.411301 | -0.316047 |
| 8             | 1             | 0           | -2.120542               | -2.313653 | 0.229598  |
| 9             | 1             | 0           | -2.593807               | -1.674216 | -1.366104 |
| 10            | 6             | 0           | -1.351088               | -0.301562 | -0.235380 |
| 11            | 6             | 0           | -0.055451               | -0.459777 | -0.315506 |
| 12            | 6             | 0           | 1.236555                | -0.626552 | -0.396580 |
| 13            | 6             | 0           | 2.142797                | -0.884472 | 0.786809  |
| 14            | 1             | 0           | -0.571871               | 2.406630  | 0.011453  |
| 15            | 1             | 0           | 1.715672                | -0.583884 | -1.375353 |
| 16            | 6             | 0           | 3.222951                | 0.207636  | 0.976907  |
| 17            | 1             | 0           | 1.551411                | -0.939055 | 1.702721  |
| 18            | 1             | 0           | 2.642061                | -1.850957 | 0.659651  |
| 19            | 1             | 0           | 3.813433                | -0.008551 | 1.872456  |

|    |   |   |           |           |           |
|----|---|---|-----------|-----------|-----------|
| 20 | 1 | 0 | 2.749980  | 1.182334  | 1.128166  |
| 21 | 6 | 0 | 4.140144  | 0.310801  | -0.156609 |
| 22 | 7 | 0 | 4.856912  | 0.375527  | -1.057828 |
| 23 | 8 | 0 | -3.560451 | -0.856349 | 0.287966  |

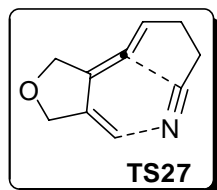

(Nimag=1) -473.6953

| Center Number | Atomic Number | Atomic Type | Coordinates (Angstroms) |           |           |
|---------------|---------------|-------------|-------------------------|-----------|-----------|
|               |               |             | X                       | Y         | Z         |
| 1             | 6             | 0           | -2.832607               | 0.348097  | -0.135305 |
| 2             | 6             | 0           | -1.577536               | -1.618944 | -0.264574 |
| 3             | 1             | 0           | -3.628262               | 0.306339  | 0.621878  |
| 4             | 1             | 0           | -3.109402               | 1.094665  | -0.885227 |
| 5             | 1             | 0           | -1.079666               | -2.141818 | -1.084319 |
| 6             | 1             | 0           | -1.891471               | -2.365589 | 0.481903  |
| 7             | 6             | 0           | -0.711704               | -0.557167 | 0.384760  |
| 8             | 6             | 0           | -1.484115               | 0.618534  | 0.497664  |
| 9             | 6             | 0           | -0.987159               | 1.825722  | 0.896911  |
| 10            | 1             | 0           | -0.133775               | 1.894020  | 1.551562  |
| 11            | 1             | 0           | -1.549520               | 2.740262  | 0.747235  |
| 12            | 6             | 0           | 0.650339                | -0.589347 | 0.460846  |
| 13            | 6             | 0           | 1.760363                | -1.179389 | 0.877413  |
| 14            | 1             | 0           | 1.767173                | -1.883701 | 1.705008  |
| 15            | 6             | 0           | 3.053226                | -0.764285 | 0.223540  |
| 16            | 6             | 0           | 2.678858                | 0.196150  | -0.915649 |
| 17            | 1             | 0           | 3.605965                | -1.628531 | -0.158139 |
| 18            | 1             | 0           | 3.706479                | -0.275294 | 0.956132  |
| 19            | 1             | 0           | 3.461348                | 0.922179  | -1.139433 |
| 20            | 1             | 0           | 2.463086                | -0.365020 | -1.829144 |
| 21            | 6             | 0           | 1.419992                | 0.917781  | -0.517755 |
| 22            | 7             | 0           | 0.894257                | 1.987173  | -0.536011 |
| 23            | 8             | 0           | -2.711212               | -0.923829 | -0.782810 |

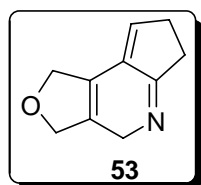

(Nimag=0)

| Center Number | Atomic Number | Atomic Type | Coordinates (Angstroms) |           |           |
|---------------|---------------|-------------|-------------------------|-----------|-----------|
|               |               |             | X                       | Y         | Z         |
| 1             | 6             | 0           | 2.824722                | 0.490587  | 0.000119  |
| 2             | 6             | 0           | 1.745354                | -1.607369 | 0.000073  |
| 3             | 1             | 0           | 3.308211                | 0.924193  | -0.886613 |
| 4             | 1             | 0           | 3.308013                | 0.923600  | 0.887264  |
| 5             | 1             | 0           | 1.673711                | -2.249043 | 0.888195  |
| 6             | 1             | 0           | 1.673354                | -2.249505 | -0.887673 |
| 7             | 6             | 0           | 0.726926                | -0.503612 | 0.000048  |
| 8             | 6             | 0           | 1.338172                | 0.688678  | 0.000076  |
| 9             | 6             | 0           | 0.604965                | 1.994747  | 0.000068  |
| 10            | 1             | 0           | 0.902299                | 2.598192  | -0.869583 |
| 11            | 1             | 0           | 0.902184                | 2.598140  | 0.869795  |
| 12            | 6             | 0           | -0.715131               | -0.554377 | 0.000022  |
| 13            | 6             | 0           | -1.617695               | -1.553445 | 0.000073  |
| 14            | 1             | 0           | -1.380762               | -2.611438 | 0.000140  |
| 15            | 6             | 0           | -3.039599               | -1.043564 | 0.000074  |
| 16            | 6             | 0           | -2.897967               | 0.501710  | -0.000169 |
| 17            | 1             | 0           | -3.589437               | -1.407316 | 0.875502  |
| 18            | 1             | 0           | -3.589573               | -1.407597 | -0.875148 |
| 19            | 1             | 0           | -3.357262               | 0.961763  | -0.877874 |
| 20            | 1             | 0           | -3.357519               | 0.962123  | 0.877209  |
| 21            | 6             | 0           | -1.400296               | 0.759272  | -0.000048 |
| 22            | 7             | 0           | -0.859065               | 1.911325  | -0.000029 |
| 23            | 8             | 0           | 3.012942                | -0.932270 | -0.000379 |

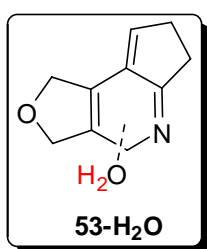

(Nimag=0)

| Center Number | Atomic Number | Atomic Type | Coordinates (Angstroms) |          |           |
|---------------|---------------|-------------|-------------------------|----------|-----------|
|               |               |             | X                       | Y        | Z         |
| 1             | 6             | 0           | -2.337986               | 0.852249 | -0.570987 |
| 2             | 6             | 0           | -0.667035               | 2.318365 | 0.224841  |
| 3             | 1             | 0           | -2.727540               | 0.910276 | -1.597855 |
| 4             | 1             | 0           | -3.105418               | 0.381685 | 0.054621  |
| 5             | 1             | 0           | -0.559723               | 2.626790 | 1.273274  |



|    |   |   |           |           |           |
|----|---|---|-----------|-----------|-----------|
| 6  | 1 | 0 | -0.223076 | 3.102679  | -0.403810 |
| 7  | 6 | 0 | -0.078970 | 0.962785  | -0.044904 |
| 8  | 6 | 0 | -1.026016 | 0.130699  | -0.499753 |
| 9  | 6 | 0 | -0.770705 | -1.301163 | -0.855067 |
| 10 | 1 | 0 | -1.054883 | -1.490063 | -1.900537 |
| 11 | 1 | 0 | -1.430481 | -1.950814 | -0.265500 |
| 12 | 6 | 0 | 1.269143  | 0.474329  | 0.113127  |
| 13 | 6 | 0 | 2.423833  | 1.026094  | 0.532447  |
| 14 | 1 | 0 | 2.545199  | 2.053450  | 0.856962  |
| 15 | 6 | 0 | 3.572876  | 0.045087  | 0.507572  |
| 16 | 6 | 0 | 2.945461  | -1.274081 | -0.015922 |
| 17 | 1 | 0 | 4.012218  | -0.075429 | 1.504553  |
| 18 | 1 | 0 | 4.383478  | 0.400564  | -0.138917 |
| 19 | 1 | 0 | 3.407080  | -1.613946 | -0.945724 |
| 20 | 1 | 0 | 3.037128  | -2.092235 | 0.701975  |
| 21 | 6 | 0 | 1.479169  | -0.947217 | -0.250481 |
| 22 | 7 | 0 | 0.609137  | -1.769394 | -0.682343 |
| 23 | 8 | 0 | -2.060693 | 2.179316  | -0.088915 |
| 24 | 8 | 0 | -3.630746 | -2.037798 | 1.074496  |
| 25 | 1 | 0 | -4.363397 | -2.630710 | 0.879185  |
| 26 | 1 | 0 | -3.511659 | -2.091523 | 2.028293  |

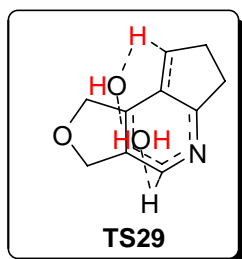

(Nimag=1) -727.2572

| Center Number | Atomic Number | Atomic Type | Coordinates (Angstroms) |           |           |
|---------------|---------------|-------------|-------------------------|-----------|-----------|
|               |               |             | X                       | Y         | Z         |
| 1             | 6             | 0           | 0.582797                | -0.775343 | -0.304418 |
| 2             | 6             | 0           | -0.830618               | -0.747317 | -0.223438 |
| 3             | 6             | 0           | -1.499706               | 0.385516  | -0.630632 |
| 4             | 6             | 0           | -0.805557               | 1.532220  | -1.077852 |
| 5             | 6             | 0           | 1.182836                | 0.367678  | -0.978287 |
| 6             | 6             | 0           | 1.571313                | -1.594881 | 0.238531  |
| 7             | 6             | 0           | 2.688714                | 0.172125  | -1.019329 |
| 8             | 6             | 0           | -1.809302               | -1.751218 | 0.308479  |
| 9             | 6             | 0           | -2.974206               | 0.172221  | -0.424493 |
| 10            | 1             | 0           | 3.174356                | 0.958444  | -0.429607 |
| 11            | 1             | 0           | 3.082044                | 0.258077  | -2.034753 |

|    |   |   |           |           |           |
|----|---|---|-----------|-----------|-----------|
| 12 | 1 | 0 | 1.377437  | -2.592093 | 0.620292  |
| 13 | 1 | 0 | -3.438663 | 0.943113  | 0.201693  |
| 14 | 1 | 0 | -3.514449 | 0.143226  | -1.380863 |
| 15 | 1 | 0 | -1.615381 | -2.030191 | 1.352544  |
| 16 | 1 | 0 | -1.834644 | -2.675060 | -0.286460 |
| 17 | 1 | 0 | -0.496780 | 1.987980  | 0.481064  |
| 18 | 1 | 0 | 0.553044  | 2.917376  | 1.331667  |
| 19 | 8 | 0 | -0.070121 | 2.189360  | 1.463563  |
| 20 | 1 | 0 | 1.346169  | -0.512064 | 1.657536  |
| 21 | 1 | 0 | -1.326825 | 2.366597  | -1.536234 |
| 22 | 8 | 0 | 1.094975  | 0.226749  | 2.354627  |
| 23 | 1 | 0 | 1.759203  | 0.269855  | 3.049650  |
| 24 | 1 | 0 | 0.467159  | 1.327943  | 1.883279  |
| 25 | 7 | 0 | 0.557087  | 1.444911  | -1.352238 |
| 26 | 8 | 0 | -3.088732 | -1.095848 | 0.236842  |
| 27 | 6 | 0 | 2.917636  | -1.235194 | -0.393408 |
| 28 | 1 | 0 | 3.749207  | -1.235269 | 0.318847  |
| 29 | 1 | 0 | 3.186096  | -1.959244 | -1.174154 |

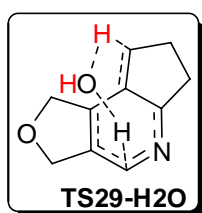

(Nimag=1) -1249.2105

| Center Number | Atomic Number | Atomic Type | Coordinates (Angstroms) |           |           |
|---------------|---------------|-------------|-------------------------|-----------|-----------|
|               |               |             | X                       | Y         | Z         |
| 1             | 6             | 0           | 0.605432                | -0.638211 | -0.298881 |
| 2             | 6             | 0           | -0.807183               | -0.568488 | -0.351765 |
| 3             | 6             | 0           | -1.366421               | 0.684630  | -0.256738 |
| 4             | 6             | 0           | -0.544917               | 1.835853  | -0.134211 |
| 5             | 6             | 0           | 1.301227                | 0.587172  | -0.691425 |
| 6             | 6             | 0           | 1.511316                | -1.464853 | 0.364342  |
| 7             | 6             | 0           | 2.777679                | 0.271864  | -0.823924 |
| 8             | 6             | 0           | -1.874687               | -1.609078 | -0.171902 |
| 9             | 6             | 0           | -2.852266               | 0.534747  | -0.075895 |
| 10            | 1             | 0           | 3.391329                | 1.098374  | -0.461573 |
| 11            | 1             | 0           | 3.047816                | 0.102811  | -1.870698 |
| 12            | 1             | 0           | 1.290211                | -2.470723 | 0.705199  |
| 13            | 1             | 0           | -3.182117               | 0.891531  | 0.910682  |
| 14            | 1             | 0           | -3.430619               | 1.066007  | -0.839228 |
| 15            | 1             | 0           | -1.780114               | -2.138638 | 0.789865  |

|    |   |   |           |           |           |
|----|---|---|-----------|-----------|-----------|
| 16 | 1 | 0 | -1.900888 | -2.360052 | -0.968221 |
| 17 | 1 | 0 | -0.058424 | 1.279838  | 1.335463  |
| 18 | 1 | 0 | 1.142905  | 1.086899  | 2.538078  |
| 19 | 8 | 0 | 0.469773  | 0.583693  | 2.057091  |
| 20 | 1 | 0 | 0.931423  | -0.298181 | 1.581136  |
| 21 | 1 | 0 | -0.976778 | 2.830286  | -0.109583 |
| 22 | 8 | 0 | -3.106813 | -0.870754 | -0.207379 |
| 23 | 6 | 0 | 2.942331  | -1.043946 | 0.006869  |
| 24 | 1 | 0 | 3.567354  | -0.890361 | 0.893321  |
| 25 | 1 | 0 | 3.441666  | -1.817185 | -0.585031 |
| 26 | 7 | 0 | 0.779641  | 1.768249  | -0.587990 |

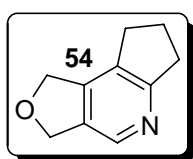

(Nimag=0)

| Center Number | Atomic Number | Atomic Type | Coordinates (Angstroms) |           |           |
|---------------|---------------|-------------|-------------------------|-----------|-----------|
|               |               |             | X                       | Y         | Z         |
| 1             | 6             | 0           | 3.024992                | -0.872087 | 0.250065  |
| 2             | 6             | 0           | 2.818503                | 0.615854  | -0.124210 |
| 3             | 6             | 0           | 1.689828                | -1.582859 | -0.106925 |
| 4             | 1             | 0           | 3.883444                | -1.321638 | -0.251780 |
| 5             | 1             | 0           | 3.196422                | -0.953965 | 1.327231  |
| 6             | 1             | 0           | 3.160759                | 0.824487  | -1.145340 |
| 7             | 1             | 0           | 3.345421                | 1.307340  | 0.536036  |
| 8             | 1             | 0           | 1.462753                | -2.411210 | 0.569824  |
| 9             | 1             | 0           | 1.724354                | -2.002545 | -1.120554 |
| 10            | 6             | 0           | 0.679507                | -0.463797 | -0.042153 |
| 11            | 6             | 0           | 1.318237                | 0.787124  | -0.049948 |
| 12            | 6             | 0           | -0.704327               | -0.464561 | -0.005785 |
| 13            | 6             | 0           | -1.719742               | -1.572821 | 0.017351  |
| 14            | 1             | 0           | -1.677975               | -2.140960 | 0.958162  |
| 15            | 6             | 0           | -2.854742               | 0.498235  | 0.096034  |
| 16            | 1             | 0           | -3.424343               | 1.013801  | -0.682910 |
| 17            | 1             | 0           | -3.279092               | 0.773775  | 1.071462  |
| 18            | 6             | 0           | -1.373269               | 0.759241  | 0.032229  |
| 19            | 6             | 0           | -0.646697               | 1.942948  | 0.023952  |
| 20            | 1             | 0           | -1.140120               | 2.910663  | 0.053085  |
| 21            | 7             | 0           | 0.695917                | 1.963142  | -0.021755 |
| 22            | 8             | 0           | -2.988633               | -0.918137 | -0.112001 |
| 23            | 1             | 0           | -1.607708               | -2.280311 | -0.810583 |

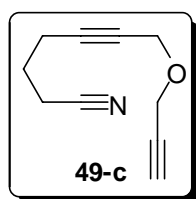

(Nimag=0)

| Center Number | Atomic Number | Atomic Type | Coordinates (Angstroms) |           |           |
|---------------|---------------|-------------|-------------------------|-----------|-----------|
|               |               |             | X                       | Y         | Z         |
| 1             | 6             | 0           | -2.786197               | 1.541070  | -0.154196 |
| 2             | 6             | 0           | -3.776501               | 0.475568  | -0.315003 |
| 3             | 6             | 0           | -3.474648               | -0.829158 | 0.453293  |
| 4             | 1             | 0           | -3.886790               | 0.268645  | -1.384874 |
| 5             | 1             | 0           | -4.734751               | 0.880999  | 0.024543  |
| 6             | 6             | 0           | -2.392399               | -1.724369 | -0.184172 |
| 7             | 1             | 0           | -3.199170               | -0.592411 | 1.483736  |
| 8             | 1             | 0           | -4.404978               | -1.403369 | 0.492471  |
| 9             | 1             | 0           | -2.352636               | -2.667232 | 0.372603  |
| 10            | 1             | 0           | -2.695614               | -1.989722 | -1.204726 |
| 11            | 6             | 0           | -1.058984               | -1.132669 | -0.210406 |
| 12            | 6             | 0           | 0.028296                | -0.617655 | -0.204711 |
| 13            | 6             | 0           | 1.303235                | 0.081906  | -0.223244 |
| 14            | 1             | 0           | 1.120659                | 1.162575  | -0.123573 |
| 15            | 1             | 0           | 1.813450                | -0.083969 | -1.181237 |
| 16            | 6             | 0           | 3.342547                | 0.342158  | 0.973813  |
| 17            | 1             | 0           | 3.797296                | -0.005996 | 1.903801  |
| 18            | 1             | 0           | 3.144460                | 1.418968  | 1.080888  |
| 19            | 6             | 0           | 4.273644                | 0.128787  | -0.139835 |
| 20            | 7             | 0           | -2.045460               | 2.414618  | -0.019959 |
| 21            | 6             | 0           | 5.042605                | -0.045167 | -1.047682 |
| 22            | 1             | 0           | 5.721237                | -0.201272 | -1.850609 |
| 23            | 8             | 0           | 2.123184                | -0.376546 | 0.854943  |

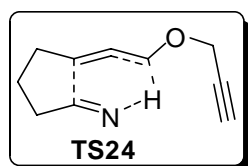

(Nimag=1) -1060.4676

| Center Number | Atomic Number | Atomic Type | Coordinates (Angstroms) |   |   |
|---------------|---------------|-------------|-------------------------|---|---|
|               |               |             | X                       | Y | Z |

|    |   |   |           |           |           |
|----|---|---|-----------|-----------|-----------|
| 1  | 6 | 0 | -1.633927 | 0.997325  | -0.244620 |
| 2  | 6 | 0 | -3.136498 | 1.076555  | -0.212875 |
| 3  | 6 | 0 | -3.696087 | -0.217478 | 0.392306  |
| 4  | 1 | 0 | -3.472275 | 1.193421  | -1.249532 |
| 5  | 1 | 0 | -3.440338 | 1.971694  | 0.332366  |
| 6  | 6 | 0 | -2.834096 | -1.375033 | -0.149899 |
| 7  | 1 | 0 | -3.608105 | -0.180302 | 1.481882  |
| 8  | 1 | 0 | -4.752070 | -0.350515 | 0.148854  |
| 9  | 1 | 0 | -2.935762 | -2.282473 | 0.448773  |
| 10 | 1 | 0 | -3.135521 | -1.624267 | -1.174369 |
| 11 | 6 | 0 | -1.433674 | -0.891113 | -0.152768 |
| 12 | 6 | 0 | -0.197031 | -1.100449 | -0.118844 |
| 13 | 6 | 0 | 0.999349  | -0.385956 | -0.198967 |
| 14 | 1 | 0 | 0.397075  | 0.757881  | -0.311149 |
| 15 | 1 | 0 | 1.582160  | -0.502298 | -1.119744 |
| 16 | 6 | 0 | 2.919889  | 0.505334  | 0.869950  |
| 17 | 1 | 0 | 3.350733  | 0.517700  | 1.872971  |
| 18 | 1 | 0 | 2.584304  | 1.523397  | 0.634758  |
| 19 | 6 | 0 | 3.934482  | 0.082801  | -0.099591 |
| 20 | 7 | 0 | -0.669742 | 1.709724  | -0.326535 |
| 21 | 6 | 0 | 4.774362  | -0.258512 | -0.889195 |
| 22 | 1 | 0 | 5.516233  | -0.562845 | -1.586814 |
| 23 | 8 | 0 | 1.802643  | -0.378788 | 0.954346  |

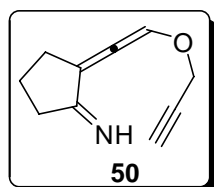

(Nimag=0)

| Center Number | Atomic Number | Atomic Type | Coordinates (Angstroms) |           |           |
|---------------|---------------|-------------|-------------------------|-----------|-----------|
|               |               |             | X                       | Y         | Z         |
| 1             | 6             | 0           | -2.297018               | 0.869904  | -0.245398 |
| 2             | 6             | 0           | -3.698651               | 0.294566  | -0.144051 |
| 3             | 6             | 0           | -3.504920               | -1.098016 | 0.481922  |
| 4             | 1             | 0           | -4.107592               | 0.206520  | -1.158408 |
| 5             | 1             | 0           | -4.358590               | 0.957519  | 0.416136  |
| 6             | 6             | 0           | -2.137931               | -1.571099 | -0.058423 |
| 7             | 1             | 0           | -3.458159               | -1.011459 | 1.571844  |
| 8             | 1             | 0           | -4.312557               | -1.791335 | 0.240133  |
| 9             | 1             | 0           | -1.650377               | -2.315840 | 0.571639  |
| 10            | 1             | 0           | -2.257463               | -2.010918 | -1.056172 |
| 11            | 6             | 0           | -1.330335               | -0.286170 | -0.173636 |

|    |   |   |           |           |           |
|----|---|---|-----------|-----------|-----------|
| 12 | 6 | 0 | -0.028746 | -0.161653 | -0.179855 |
| 13 | 6 | 0 | 1.271233  | -0.031684 | -0.222691 |
| 14 | 1 | 0 | -1.042523 | 2.273701  | -0.412650 |
| 15 | 1 | 0 | 1.817162  | -0.058063 | -1.163790 |
| 16 | 6 | 0 | 3.324087  | 0.680287  | 0.728157  |
| 17 | 1 | 0 | 3.739424  | 0.769328  | 1.733357  |
| 18 | 1 | 0 | 3.208450  | 1.691985  | 0.319826  |
| 19 | 6 | 0 | 4.226848  | -0.099104 | -0.118895 |
| 20 | 7 | 0 | -2.052465 | 2.111208  | -0.357680 |
| 21 | 6 | 0 | 4.980306  | -0.730729 | -0.810235 |
| 22 | 1 | 0 | 5.644469  | -1.294099 | -1.419807 |
| 23 | 8 | 0 | 2.039471  | 0.075799  | 0.915035  |

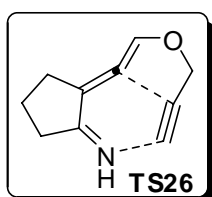

(Nimag=1) -431.6646

| Center Number | Atomic Number | Atomic Type | Coordinates (Angstroms) |           |           |
|---------------|---------------|-------------|-------------------------|-----------|-----------|
|               |               |             | X                       | Y         | Z         |
| 1             | 6             | 0           | 3.006882                | -0.946707 | 0.311691  |
| 2             | 6             | 0           | 2.779259                | 0.577430  | 0.273672  |
| 3             | 6             | 0           | 1.587376                | -1.548879 | 0.435789  |
| 4             | 1             | 0           | 3.460464                | -1.272056 | -0.629462 |
| 5             | 1             | 0           | 3.667827                | -1.261803 | 1.121125  |
| 6             | 1             | 0           | 3.556564                | 1.131064  | -0.254363 |
| 7             | 1             | 0           | 2.714832                | 0.989787  | 1.288693  |
| 8             | 1             | 0           | 1.295893                | -1.646843 | 1.489576  |
| 9             | 1             | 0           | 1.502244                | -2.543375 | -0.010052 |
| 10            | 6             | 0           | 0.705272                | -0.521106 | -0.254355 |
| 11            | 6             | 0           | 1.426376                | 0.713699  | -0.403696 |
| 12            | 6             | 0           | -0.650159               | -0.560192 | -0.379008 |
| 13            | 6             | 0           | -1.709475               | -1.282384 | -0.740173 |
| 14            | 1             | 0           | -1.727416               | -2.051298 | -1.501314 |
| 15            | 6             | 0           | -2.808424               | 0.056126  | 0.737737  |
| 16            | 1             | 0           | -3.738710               | 0.621251  | 0.734450  |
| 17            | 1             | 0           | -2.655251               | -0.406103 | 1.718848  |
| 18            | 6             | 0           | -1.621189               | 0.907865  | 0.406209  |
| 19            | 7             | 0           | 0.976793                | 1.829147  | -0.894377 |
| 20            | 1             | 0           | 0.113962                | 1.659375  | -1.410462 |
| 21            | 6             | 0           | -1.166028               | 2.058874  | 0.465787  |

|    |   |   |           |           |           |
|----|---|---|-----------|-----------|-----------|
| 22 | 1 | 0 | -0.827373 | 3.062490  | 0.557919  |
| 23 | 8 | 0 | -2.937490 | -0.976860 | -0.245781 |

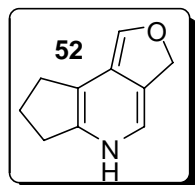

(Nimag=0)

| Center Number | Atomic Number | Atomic Type | Coordinates (Angstroms) |           |           |
|---------------|---------------|-------------|-------------------------|-----------|-----------|
|               |               |             | X                       | Y         | Z         |
| 1             | 6             | 0           | 3.046250                | -0.894523 | 0.200007  |
| 2             | 6             | 0           | 2.797822                | 0.608728  | -0.095551 |
| 3             | 6             | 0           | 1.698773                | -1.615398 | -0.082216 |
| 4             | 1             | 0           | 3.871195                | -1.300207 | -0.388676 |
| 5             | 1             | 0           | 3.308062                | -1.016333 | 1.253930  |
| 6             | 1             | 0           | 3.154085                | 0.896967  | -1.093577 |
| 7             | 1             | 0           | 3.304737                | 1.264138  | 0.622096  |
| 8             | 1             | 0           | 1.497665                | -2.408030 | 0.646513  |
| 9             | 1             | 0           | 1.690834                | -2.093250 | -1.071600 |
| 10            | 6             | 0           | 0.690334                | -0.499101 | -0.018219 |
| 11            | 6             | 0           | 1.299327                | 0.708743  | -0.025938 |
| 12            | 6             | 0           | -0.754100               | -0.564816 | -0.010203 |
| 13            | 6             | 0           | -1.683907               | -1.539421 | -0.035048 |
| 14            | 1             | 0           | -1.598439               | -2.613272 | -0.074334 |
| 15            | 6             | 0           | -2.927502               | 0.389764  | 0.060932  |
| 16            | 1             | 0           | -3.487406               | 0.797329  | -0.786512 |
| 17            | 1             | 0           | -3.419720               | 0.702261  | 0.988398  |
| 18            | 6             | 0           | -1.452832               | 0.721143  | 0.029265  |
| 19            | 6             | 0           | -0.797258               | 1.892083  | 0.019287  |
| 20            | 1             | 0           | -1.277008               | 2.862035  | 0.040009  |
| 21            | 7             | 0           | 0.607886                | 1.910106  | -0.067173 |
| 22            | 1             | 0           | 1.092126                | 2.755390  | 0.188631  |
| 23            | 8             | 0           | -2.986598               | -1.057622 | -0.013571 |

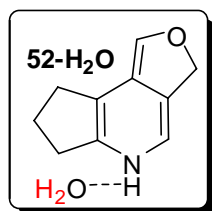

(Nimag=0)

| Center | Atomic | Atomic | Coordinates (Angstroms) |  |  |
|--------|--------|--------|-------------------------|--|--|
|--------|--------|--------|-------------------------|--|--|

| Number | Number | Type | X         | Y         | Z         |
|--------|--------|------|-----------|-----------|-----------|
| 1      | 6      | 0    | 2.922766  | -0.904175 | -0.419565 |
| 2      | 6      | 0    | 2.648455  | 0.598398  | -0.694431 |
| 3      | 6      | 0    | 1.553551  | -1.623582 | -0.567964 |
| 4      | 1      | 0    | 3.684864  | -1.312572 | -1.085460 |
| 5      | 1      | 0    | 3.283792  | -1.022236 | 0.604440  |
| 6      | 1      | 0    | 2.896711  | 0.882846  | -1.725432 |
| 7      | 1      | 0    | 3.224933  | 1.255187  | -0.034202 |
| 8      | 1      | 0    | 1.428828  | -2.422867 | 0.169933  |
| 9      | 1      | 0    | 1.439953  | -2.089646 | -1.556272 |
| 10     | 6      | 0    | 0.557087  | -0.506167 | -0.393587 |
| 11     | 6      | 0    | 1.164250  | 0.703921  | -0.474974 |
| 12     | 6      | 0    | -0.883124 | -0.567972 | -0.257865 |
| 13     | 6      | 0    | -1.812118 | -1.540518 | -0.179579 |
| 14     | 1      | 0    | -1.730704 | -2.615056 | -0.209770 |
| 15     | 6      | 0    | -3.041066 | 0.393739  | -0.014274 |
| 16     | 1      | 0    | -3.661023 | 0.776127  | -0.831146 |
| 17     | 1      | 0    | -3.465391 | 0.734548  | 0.935963  |
| 18     | 6      | 0    | -1.573145 | 0.721025  | -0.168497 |
| 19     | 6      | 0    | -0.918537 | 1.889789  | -0.248024 |
| 20     | 1      | 0    | -1.391665 | 2.861324  | -0.190889 |
| 21     | 7      | 0    | 0.473600  | 1.903476  | -0.462570 |
| 22     | 1      | 0    | 0.980661  | 2.747290  | -0.247780 |
| 23     | 8      | 0    | -3.104673 | -1.055980 | -0.041376 |
| 24     | 8      | 0    | 1.215852  | 0.068679  | 2.869726  |
| 25     | 1      | 0    | 0.967121  | -0.014323 | 1.937910  |
| 26     | 1      | 0    | 0.428569  | -0.193290 | 3.356460  |

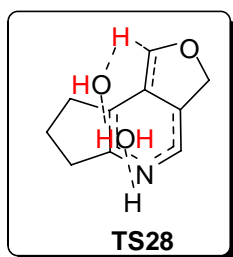

(Nimag=1) -1128.8274

| Center Number | Atomic Number | Atomic Type | Coordinates (Angstroms) |           |           |
|---------------|---------------|-------------|-------------------------|-----------|-----------|
|               |               |             | X                       | Y         | Z         |
| 1             | 6             | 0           | 0.638207                | -0.879332 | -0.191243 |
| 2             | 6             | 0           | -0.781031               | -0.835838 | -0.146390 |
| 3             | 6             | 0           | -1.395925               | 0.288410  | -0.652950 |
| 4             | 6             | 0           | 0.567630                | 1.156021  | -1.514026 |



|    |   |   |           |           |           |
|----|---|---|-----------|-----------|-----------|
| 5  | 6 | 0 | 1.270326  | 0.083992  | -1.064071 |
| 6  | 6 | 0 | 1.630532  | -1.464035 | 0.580619  |
| 7  | 6 | 0 | 2.741027  | -0.257858 | -1.073383 |
| 8  | 6 | 0 | -1.762763 | -1.738160 | 0.555942  |
| 9  | 6 | 0 | -2.876445 | 0.272802  | -0.348783 |
| 10 | 1 | 0 | 3.402450  | 0.609610  | -0.989138 |
| 11 | 1 | 0 | 3.038805  | -0.832823 | -1.962553 |
| 12 | 1 | 0 | 1.615812  | -2.399051 | 1.123937  |
| 13 | 1 | 0 | -3.096736 | 0.974606  | 0.466467  |
| 14 | 1 | 0 | -3.474985 | 0.587400  | -1.207267 |
| 15 | 1 | 0 | -1.657798 | -1.653676 | 1.647697  |
| 16 | 1 | 0 | -1.625969 | -2.796556 | 0.312113  |
| 17 | 1 | 0 | -0.579978 | 2.149402  | 0.070384  |
| 18 | 1 | 0 | 0.068309  | 3.318419  | 1.067471  |
| 19 | 8 | 0 | -0.300678 | 2.428323  | 1.075253  |
| 20 | 1 | 0 | 1.225181  | -0.168869 | 1.638081  |
| 21 | 1 | 0 | 1.045399  | 1.956787  | -2.073770 |
| 22 | 8 | 0 | 1.028691  | 0.735904  | 2.191266  |
| 23 | 1 | 0 | 1.856361  | 1.025268  | 2.591651  |
| 24 | 1 | 0 | 0.392517  | 1.619376  | 1.616679  |
| 25 | 6 | 0 | -3.135391 | -1.193890 | 0.074840  |
| 26 | 1 | 0 | -3.462984 | -1.768293 | -0.795966 |
| 27 | 1 | 0 | -3.913211 | -1.283201 | 0.835875  |
| 28 | 8 | 0 | 2.920216  | -1.094365 | 0.095756  |
| 29 | 7 | 0 | -0.770858 | 1.358577  | -1.223312 |

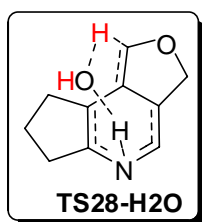

(Nimag=1) -605.7378

| Center Number | Atomic Number | Atomic Type | Coordinates (Angstroms) |           |           |
|---------------|---------------|-------------|-------------------------|-----------|-----------|
|               |               |             | X                       | Y         | Z         |
| 1             | 6             | 0           | 0.638005                | -0.682088 | -0.288270 |
| 2             | 6             | 0           | -0.786054               | -0.585821 | -0.321365 |
| 3             | 6             | 0           | -1.293856               | 0.689986  | -0.248493 |
| 4             | 6             | 0           | 0.752779                | 1.697553  | -0.655215 |
| 5             | 6             | 0           | 1.358173                | 0.486979  | -0.775519 |
| 6             | 6             | 0           | 1.558054                | -1.452004 | 0.396405  |
| 7             | 6             | 0           | 2.807080                | 0.078104  | -0.816214 |
| 8             | 6             | 0           | -1.855205               | -1.623458 | -0.096593 |

|    |   |   |           |           |           |
|----|---|---|-----------|-----------|-----------|
| 9  | 6 | 0 | -2.784271 | 0.662512  | -0.003876 |
| 10 | 1 | 0 | 3.507243  | 0.859162  | -0.512005 |
| 11 | 1 | 0 | 3.122838  | -0.318780 | -1.790909 |
| 12 | 1 | 0 | 1.490913  | -2.457589 | 0.785973  |
| 13 | 1 | 0 | -2.994293 | 0.936427  | 1.038787  |
| 14 | 1 | 0 | -3.316842 | 1.382242  | -0.630334 |
| 15 | 1 | 0 | -1.795319 | -2.032181 | 0.923992  |
| 16 | 1 | 0 | -1.783231 | -2.476866 | -0.777599 |
| 17 | 1 | 0 | -0.020811 | 1.346158  | 1.287659  |
| 18 | 1 | 0 | 1.137851  | 1.181856  | 2.486112  |
| 19 | 8 | 0 | 0.429163  | 0.704300  | 2.031118  |
| 20 | 1 | 0 | 0.835437  | -0.189987 | 1.565681  |
| 21 | 1 | 0 | 1.293844  | 2.627733  | -0.812198 |
| 22 | 8 | 0 | 2.875552  | -1.010632 | 0.152387  |
| 23 | 6 | 0 | -3.162385 | -0.809445 | -0.299507 |
| 24 | 1 | 0 | -3.480819 | -0.898641 | -1.341582 |
| 25 | 1 | 0 | -3.982235 | -1.170457 | 0.324637  |
| 26 | 7 | 0 | -0.549459 | 1.841095  | -0.194911 |

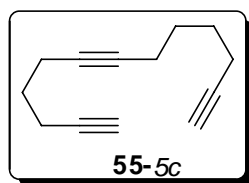

(Nimag=0)

| Center Number | Atomic Number | Atomic Type | Coordinates (Angstroms) |           |           |
|---------------|---------------|-------------|-------------------------|-----------|-----------|
|               |               |             | X                       | Y         | Z         |
| 1             | 6             | 0           | -3.513386               | 1.642754  | -0.127086 |
| 2             | 6             | 0           | -2.768021               | 2.579831  | -0.014968 |
| 3             | 1             | 0           | -2.095664               | 3.396674  | 0.079663  |
| 4             | 6             | 0           | -4.473164               | 0.546887  | -0.241443 |
| 5             | 6             | 0           | -4.126669               | -0.735076 | 0.549590  |
| 6             | 1             | 0           | -4.610962               | 0.296049  | -1.300198 |
| 7             | 1             | 0           | -5.443021               | 0.917848  | 0.108824  |
| 8             | 6             | 0           | -3.118309               | -1.682388 | -0.133268 |
| 9             | 1             | 0           | -3.766338               | -0.464772 | 1.545391  |
| 10            | 1             | 0           | -5.055232               | -1.298335 | 0.687194  |
| 11            | 1             | 0           | -3.088790               | -2.617506 | 0.438293  |
| 12            | 1             | 0           | -3.500161               | -1.951009 | -1.126569 |
| 13            | 6             | 0           | -1.756549               | -1.169216 | -0.266646 |
| 14            | 6             | 0           | -0.629951               | -0.758577 | -0.381893 |
| 15            | 6             | 0           | 0.723880                | -0.225106 | -0.503836 |
| 16            | 6             | 0           | 1.541264                | -0.333455 | 0.801351  |

|    |   |   |          |           |           |
|----|---|---|----------|-----------|-----------|
| 17 | 1 | 0 | 0.664848 | 0.828694  | -0.804851 |
| 18 | 1 | 0 | 1.239607 | -0.746221 | -1.318311 |
| 19 | 6 | 0 | 2.941328 | 0.287399  | 0.716328  |
| 20 | 1 | 0 | 0.981180 | 0.164127  | 1.598439  |
| 21 | 1 | 0 | 1.615803 | -1.387720 | 1.090723  |
| 22 | 1 | 0 | 3.382319 | 0.311263  | 1.717155  |
| 23 | 1 | 0 | 2.869556 | 1.329722  | 0.386706  |
| 24 | 6 | 0 | 3.907437 | -0.469834 | -0.220503 |
| 25 | 1 | 0 | 3.519539 | -0.475327 | -1.244702 |
| 26 | 1 | 0 | 3.966501 | -1.519726 | 0.091061  |
| 27 | 6 | 0 | 5.251861 | 0.099723  | -0.233724 |
| 28 | 6 | 0 | 6.352610 | 0.584974  | -0.230214 |
| 29 | 1 | 0 | 7.326831 | 1.008738  | -0.230943 |

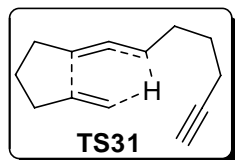

(Nimag=1) -963.4188

| Center<br>Number | Atomic<br>Number | Atomic<br>Type | Coordinates (Angstroms) |           |           |
|------------------|------------------|----------------|-------------------------|-----------|-----------|
|                  |                  |                | X                       | Y         | Z         |
| 1                | 6                | 0              | -2.072607               | 1.215953  | -0.099026 |
| 2                | 6                | 0              | -0.909223               | 1.669882  | -0.116218 |
| 3                | 1                | 0              | -0.284287               | 2.538144  | -0.046570 |
| 4                | 6                | 0              | -3.546555               | 1.392916  | -0.012254 |
| 5                | 6                | 0              | -4.231995               | 0.121842  | 0.508153  |
| 6                | 1                | 0              | -3.921508               | 1.625335  | -1.016867 |
| 7                | 1                | 0              | -3.773736               | 2.256018  | 0.620564  |
| 8                | 6                | 0              | -3.634178               | -1.072187 | -0.256900 |
| 9                | 1                | 0              | -4.025833               | 0.008075  | 1.576709  |
| 10               | 1                | 0              | -5.316366               | 0.174671  | 0.381871  |
| 11               | 1                | 0              | -3.878649               | -2.022006 | 0.225890  |
| 12               | 1                | 0              | -4.048284               | -1.108773 | -1.272018 |
| 13               | 6                | 0              | -2.174004               | -0.882660 | -0.324917 |
| 14               | 6                | 0              | -0.984027               | -1.229991 | -0.416685 |
| 15               | 6                | 0              | 0.330977                | -0.752203 | -0.427234 |
| 16               | 6                | 0              | 1.264871                | -1.092348 | 0.738809  |
| 17               | 1                | 0              | -0.011677               | 0.479987  | -0.307819 |
| 18               | 1                | 0              | 0.815056                | -0.798178 | -1.406903 |
| 19               | 6                | 0              | 2.530653                | -0.226386 | 0.806321  |
| 20               | 1                | 0              | 0.704034                | -0.976891 | 1.670928  |
| 21               | 1                | 0              | 1.550736                | -2.149389 | 0.679454  |

|    |   |   |          |           |           |
|----|---|---|----------|-----------|-----------|
| 22 | 1 | 0 | 3.052434 | -0.434369 | 1.745090  |
| 23 | 1 | 0 | 2.259755 | 0.833667  | 0.831280  |
| 24 | 6 | 0 | 3.514953 | -0.468246 | -0.358339 |
| 25 | 1 | 0 | 3.038500 | -0.231173 | -1.315523 |
| 26 | 1 | 0 | 3.775036 | -1.532962 | -0.399838 |
| 27 | 6 | 0 | 4.740625 | 0.316658  | -0.240373 |
| 28 | 6 | 0 | 5.742891 | 0.971840  | -0.124506 |
| 29 | 1 | 0 | 6.630507 | 1.547421  | -0.027246 |

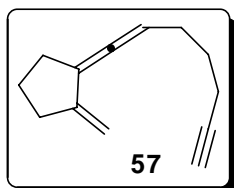

(Nimag=0)

| Center Number | Atomic Number | Atomic Type | Coordinates (Angstroms) |           |           |
|---------------|---------------|-------------|-------------------------|-----------|-----------|
|               |               |             | X                       | Y         | Z         |
| 1             | 6             | 0           | -3.135003               | -0.639444 | -0.130630 |
| 2             | 6             | 0           | -4.265334               | 0.357183  | -0.333966 |
| 3             | 6             | 0           | -3.553716               | 1.713957  | -0.493059 |
| 4             | 1             | 0           | -4.899124               | 0.374508  | 0.561962  |
| 5             | 1             | 0           | -4.905230               | 0.096735  | -1.179486 |
| 6             | 6             | 0           | -2.337300               | 1.601208  | 0.445652  |
| 7             | 1             | 0           | -3.212510               | 1.833571  | -1.526302 |
| 8             | 1             | 0           | -4.195709               | 2.564486  | -0.253756 |
| 9             | 1             | 0           | -1.514972               | 2.266702  | 0.179156  |
| 10            | 1             | 0           | -2.632151               | 1.838676  | 1.475107  |
| 11            | 6             | 0           | -1.952004               | 0.124825  | 0.355351  |
| 12            | 6             | 0           | -0.771611               | -0.367074 | 0.641797  |
| 13            | 6             | 0           | 0.403715                | -0.864070 | 0.916690  |
| 14            | 1             | 0           | 0.608342                | -1.190296 | 1.938214  |
| 15            | 6             | 0           | 1.540209                | -1.014304 | -0.071685 |
| 16            | 1             | 0           | 1.192214                | -0.736756 | -1.070887 |
| 17            | 1             | 0           | 1.831576                | -2.072019 | -0.117752 |
| 18            | 6             | 0           | 2.767595                | -0.172747 | 0.311293  |
| 19            | 1             | 0           | 2.493966                | 0.886030  | 0.334662  |
| 20            | 1             | 0           | 3.098043                | -0.432792 | 1.322156  |
| 21            | 6             | 0           | 3.940633                | -0.374952 | -0.669170 |
| 22            | 1             | 0           | 4.219346                | -1.435197 | -0.694181 |
| 23            | 1             | 0           | 3.617169                | -0.119441 | -1.685212 |
| 24            | 6             | 0           | 5.117921                | 0.419289  | -0.330924 |
| 25            | 6             | 0           | 6.077955                | 1.081791  | -0.036769 |
| 26            | 1             | 0           | 6.928528                | 1.664899  | 0.218479  |

|    |   |   |           |           |           |
|----|---|---|-----------|-----------|-----------|
| 27 | 6 | 0 | -3.196727 | -1.952863 | -0.366344 |
| 28 | 1 | 0 | -2.344006 | -2.599924 | -0.192792 |
| 29 | 1 | 0 | -4.103480 | -2.415968 | -0.738787 |

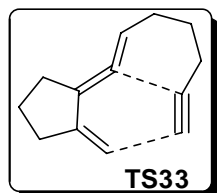

(Nimag=1) -510.4890

| Center Number | Atomic Number | Atomic Type | Coordinates (Angstroms) |           |           |
|---------------|---------------|-------------|-------------------------|-----------|-----------|
|               |               |             | X                       | Y         | Z         |
| 1             | 6             | 0           | 2.963432                | -0.794000 | 1.027347  |
| 2             | 6             | 0           | 3.151168                | 0.308851  | -0.038286 |
| 3             | 6             | 0           | 1.782577                | -1.643188 | 0.506685  |
| 4             | 1             | 0           | 3.868567                | -1.382288 | 1.196417  |
| 5             | 1             | 0           | 2.684113                | -0.334793 | 1.980434  |
| 6             | 1             | 0           | 3.863297                | -0.013650 | -0.808600 |
| 7             | 1             | 0           | 3.536359                | 1.244547  | 0.376675  |
| 8             | 1             | 0           | 1.202588                | -2.109403 | 1.305142  |
| 9             | 1             | 0           | 2.138998                | -2.451016 | -0.146464 |
| 10            | 6             | 0           | 0.965629                | -0.650451 | -0.316333 |
| 11            | 6             | 0           | 1.770244                | 0.468579  | -0.649896 |
| 12            | 6             | 0           | 1.273953                | 1.586248  | -1.265061 |
| 13            | 1             | 0           | 0.390165                | 1.533298  | -1.884341 |
| 14            | 1             | 0           | 1.894603                | 2.468362  | -1.390786 |
| 15            | 6             | 0           | -0.383813               | -0.685793 | -0.451295 |
| 16            | 6             | 0           | -1.447031               | -1.306607 | -0.924686 |
| 17            | 1             | 0           | -1.262726               | -2.051175 | -1.702470 |
| 18            | 6             | 0           | -2.889134               | -1.193158 | -0.487317 |
| 19            | 6             | 0           | -2.299676               | 0.634121  | 1.223516  |
| 20            | 1             | 0           | -3.087246               | -2.018569 | 0.212633  |
| 21            | 1             | 0           | -3.536910               | -1.383535 | -1.349379 |
| 22            | 1             | 0           | -2.770375               | 1.420894  | 1.823021  |
| 23            | 1             | 0           | -2.038746               | -0.179838 | 1.909284  |
| 24            | 6             | 0           | -1.083319               | 1.192372  | 0.589973  |
| 25            | 6             | 0           | -0.366371               | 2.156354  | 0.303548  |
| 26            | 1             | 0           | -0.002962               | 3.157406  | 0.311464  |
| 27            | 6             | 0           | -3.301017               | 0.127107  | 0.168696  |
| 28            | 1             | 0           | -3.419576               | 0.902489  | -0.594679 |
| 29            | 1             | 0           | -4.280011               | -0.005353 | 0.640301  |

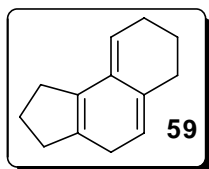

(Nimag=0)

---

| Center Number | Atomic Number | Atomic Type | Coordinates (Angstroms) |           |           |
|---------------|---------------|-------------|-------------------------|-----------|-----------|
|               |               |             | X                       | Y         | Z         |
| 1             | 6             | 0           | -3.256408               | -1.119234 | -0.180866 |
| 2             | 6             | 0           | -3.173537               | 0.386927  | 0.174775  |
| 3             | 6             | 0           | -1.823272               | -1.673329 | 0.026589  |
| 4             | 1             | 0           | -4.003792               | -1.652231 | 0.410566  |
| 5             | 1             | 0           | -3.537754               | -1.227159 | -1.231819 |
| 6             | 1             | 0           | -3.526177               | 0.585736  | 1.197027  |
| 7             | 1             | 0           | -3.787142               | 1.009088  | -0.486674 |
| 8             | 1             | 0           | -1.551448               | -2.408646 | -0.737212 |
| 9             | 1             | 0           | -1.717054               | -2.177319 | 0.996425  |
| 10            | 6             | 0           | -0.959151               | -0.431261 | -0.018819 |
| 11            | 6             | 0           | -1.699887               | 0.687587  | 0.060157  |
| 12            | 6             | 0           | -1.112468               | 2.061189  | 0.097182  |
| 13            | 1             | 0           | -1.399821               | 2.567919  | 1.033233  |
| 14            | 1             | 0           | -1.557612               | 2.684719  | -0.694379 |
| 15            | 6             | 0           | 0.501638                | -0.405018 | -0.066175 |
| 16            | 6             | 0           | 1.259001                | -1.525749 | -0.040748 |
| 17            | 1             | 0           | 0.767841                | -2.493917 | -0.022170 |
| 18            | 6             | 0           | 2.763379                | -1.521717 | -0.013253 |
| 19            | 6             | 0           | 2.623167                | 0.972460  | -0.338110 |
| 20            | 1             | 0           | 3.153438                | -1.784833 | -1.008324 |
| 21            | 1             | 0           | 3.120916                | -2.311413 | 0.657649  |
| 22            | 1             | 0           | 3.018978                | 1.948013  | -0.042036 |
| 23            | 1             | 0           | 2.833774                | 0.857951  | -1.410681 |
| 24            | 6             | 0           | 1.124781                | 0.934662  | -0.130545 |
| 25            | 6             | 0           | 0.384428                | 2.051113  | -0.043200 |
| 26            | 1             | 0           | 0.877899                | 3.018994  | -0.088957 |
| 27            | 6             | 0           | 3.324981                | -0.161617 | 0.419886  |
| 28            | 1             | 0           | 3.162730                | -0.030226 | 1.495709  |
| 29            | 1             | 0           | 4.405317                | -0.122762 | 0.250395  |

---

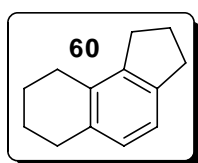

(Nimag=0)

| Center<br>Number | Atomic<br>Number | Atomic<br>Type | Coordinates (Angstroms) |           |           |
|------------------|------------------|----------------|-------------------------|-----------|-----------|
|                  |                  |                | X                       | Y         | Z         |
| 1                | 6                | 0              | -2.756195               | -1.380455 | -0.343008 |
| 2                | 6                | 0              | -2.570191               | 1.100187  | -0.011486 |
| 3                | 6                | 0              | -1.273555               | -1.597676 | -0.018670 |
| 4                | 1                | 0              | -3.323835               | -2.285220 | -0.104577 |
| 5                | 1                | 0              | -2.876515               | -1.207839 | -1.419751 |
| 6                | 1                | 0              | -2.848324               | 1.939265  | 0.634360  |
| 7                | 1                | 0              | -2.902191               | 1.374464  | -1.022242 |
| 8                | 1                | 0              | -0.840273               | -2.322337 | -0.716078 |
| 9                | 1                | 0              | -1.186713               | -2.056744 | 0.976206  |
| 10               | 6                | 0              | -0.451584               | -0.321088 | -0.036719 |
| 11               | 6                | 0              | -1.058394               | 0.948071  | -0.017336 |
| 12               | 6                | 0              | 0.947703                | -0.387451 | -0.044169 |
| 13               | 6                | 0              | 1.823154                | -1.625144 | -0.066670 |
| 14               | 1                | 0              | 1.829338                | -2.069360 | -1.071463 |
| 15               | 6                | 0              | 3.223394                | -1.079868 | 0.309969  |
| 16               | 6                | 0              | 3.206293                | 0.409804  | -0.109762 |
| 17               | 1                | 0              | 4.036366                | -1.643346 | -0.152950 |
| 18               | 1                | 0              | 3.354345                | -1.146917 | 1.394216  |
| 19               | 1                | 0              | 3.824248                | 1.038078  | 0.537598  |
| 20               | 1                | 0              | 3.587906                | 0.534231  | -1.131579 |
| 21               | 6                | 0              | 1.735994                | 0.764594  | -0.056947 |
| 22               | 6                | 0              | 1.134900                | 2.019941  | -0.046305 |
| 23               | 1                | 0              | 1.732584                | 2.925905  | -0.049480 |
| 24               | 6                | 0              | -3.304472               | -0.172751 | 0.420792  |
| 25               | 1                | 0              | -3.169564               | -0.331429 | 1.498019  |
| 26               | 1                | 0              | -4.379595               | -0.060150 | 0.250045  |
| 27               | 6                | 0              | -0.254813               | 2.096589  | -0.020185 |
| 28               | 1                | 0              | -0.735242               | 3.070487  | 0.002742  |
| 29               | 1                | 0              | 1.484058                | -2.407598 | 0.617911  |

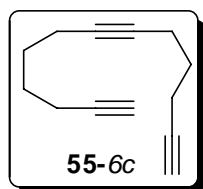

(Nimag=0)

| Center<br>Number | Atomic<br>Number | Atomic<br>Type | Coordinates (Angstroms) |          |          |
|------------------|------------------|----------------|-------------------------|----------|----------|
|                  |                  |                | X                       | Y        | Z        |
| 1                | 6                | 0              | -2.824218               | 1.717068 | 0.133642 |

|    |   |   |           |           |           |
|----|---|---|-----------|-----------|-----------|
| 2  | 6 | 0 | -2.658913 | 2.589173  | -0.678215 |
| 3  | 1 | 0 | -2.494553 | 3.352902  | -1.397981 |
| 4  | 6 | 0 | -3.074835 | 0.674965  | 1.126458  |
| 5  | 1 | 0 | -3.697575 | 1.110304  | 1.915859  |
| 6  | 1 | 0 | -2.129276 | 0.390338  | 1.600402  |
| 7  | 6 | 0 | -1.982253 | -1.292740 | -1.204553 |
| 8  | 1 | 0 | -1.785917 | -2.190634 | -1.801503 |
| 9  | 1 | 0 | -2.514173 | -0.598262 | -1.864667 |
| 10 | 6 | 0 | -0.695480 | -0.712069 | -0.822404 |
| 11 | 6 | 0 | 0.377436  | -0.257987 | -0.513653 |
| 12 | 6 | 0 | 1.673463  | 0.301197  | -0.136565 |
| 13 | 6 | 0 | 2.507612  | -0.644469 | 0.747768  |
| 14 | 1 | 0 | 1.518701  | 1.250872  | 0.391123  |
| 15 | 1 | 0 | 2.242651  | 0.543838  | -1.040608 |
| 16 | 6 | 0 | 3.871281  | -0.047491 | 1.152614  |
| 17 | 1 | 0 | 1.947261  | -0.875456 | 1.658529  |
| 18 | 1 | 0 | 2.664919  | -1.589173 | 0.220572  |
| 19 | 1 | 0 | 4.364122  | -0.726068 | 1.857198  |
| 20 | 1 | 0 | 3.714997  | 0.894389  | 1.692433  |
| 21 | 6 | 0 | 4.769999  | 0.193539  | 0.025854  |
| 22 | 6 | 0 | 5.503716  | 0.381320  | -0.908831 |
| 23 | 1 | 0 | 6.154679  | 0.549350  | -1.731527 |
| 24 | 6 | 0 | -3.788302 | -0.583936 | 0.569858  |
| 25 | 1 | 0 | -4.521525 | -0.267138 | -0.178773 |
| 26 | 1 | 0 | -4.360791 | -1.031264 | 1.389189  |
| 27 | 6 | 0 | -2.893075 | -1.686563 | -0.014665 |
| 28 | 1 | 0 | -2.268199 | -2.113252 | 0.776889  |
| 29 | 1 | 0 | -3.553909 | -2.492789 | -0.350987 |

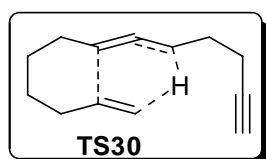

(Nimag=1) -1051.9782

| Center Number | Atomic Number | Atomic Type | Coordinates (Angstroms) |          |           |
|---------------|---------------|-------------|-------------------------|----------|-----------|
|               |               |             | X                       | Y        | Z         |
| 1             | 6             | 0           | -1.292432               | 1.259552 | -0.111975 |
| 2             | 6             | 0           | -0.149506               | 1.745680 | -0.249211 |
| 3             | 1             | 0           | 0.404805                | 2.659235 | -0.352706 |
| 4             | 6             | 0           | -2.725297               | 1.538980 | 0.163530  |
| 5             | 1             | 0           | -2.942707               | 2.536689 | -0.237027 |
| 6             | 1             | 0           | -2.836327               | 1.617444 | 1.252783  |



|    |   |   |           |           |           |
|----|---|---|-----------|-----------|-----------|
| 7  | 6 | 0 | -2.493336 | -1.654235 | -0.245253 |
| 8  | 1 | 0 | -2.459274 | -2.626440 | 0.258075  |
| 9  | 1 | 0 | -2.669624 | -1.864105 | -1.308205 |
| 10 | 6 | 0 | -1.163818 | -1.017227 | -0.122216 |
| 11 | 6 | 0 | 0.072188  | -1.138593 | -0.125076 |
| 12 | 6 | 0 | 1.321212  | -0.527440 | -0.187815 |
| 13 | 6 | 0 | 2.255886  | -0.582616 | 1.017914  |
| 14 | 1 | 0 | 0.815165  | 0.675129  | -0.263152 |
| 15 | 1 | 0 | 1.839555  | -0.630650 | -1.144376 |
| 16 | 6 | 0 | 3.437231  | 0.406739  | 0.920553  |
| 17 | 1 | 0 | 1.685463  | -0.356924 | 1.923551  |
| 18 | 1 | 0 | 2.651805  | -1.596512 | 1.132072  |
| 19 | 1 | 0 | 4.010430  | 0.368135  | 1.853115  |
| 20 | 1 | 0 | 3.054915  | 1.430251  | 0.836648  |
| 21 | 6 | 0 | 4.340402  | 0.141469  | -0.197016 |
| 22 | 6 | 0 | 5.080956  | -0.090028 | -1.116455 |
| 23 | 1 | 0 | 5.736999  | -0.290622 | -1.927711 |
| 24 | 6 | 0 | -3.779178 | 0.549559  | -0.352614 |
| 25 | 1 | 0 | -3.708376 | 0.462873  | -1.443317 |
| 26 | 1 | 0 | -4.763833 | 0.977376  | -0.137628 |
| 27 | 6 | 0 | -3.675804 | -0.836448 | 0.287240  |
| 28 | 1 | 0 | -3.597481 | -0.732205 | 1.375992  |
| 29 | 1 | 0 | -4.592533 | -1.402037 | 0.092240  |

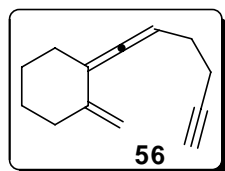

(Nimag=0)

| Center Number | Atomic Number | Atomic Type | Coordinates (Angstroms) |           |           |
|---------------|---------------|-------------|-------------------------|-----------|-----------|
|               |               |             | X                       | Y         | Z         |
| 1             | 6             | 0           | -1.681549               | 1.127790  | -0.068867 |
| 2             | 6             | 0           | -1.230523               | 2.314528  | -0.486064 |
| 3             | 1             | 0           | -1.698640               | 3.238413  | -0.162586 |
| 4             | 6             | 0           | -2.874532               | 0.985579  | 0.854655  |
| 5             | 1             | 0           | -3.367015               | 1.954062  | 0.976697  |
| 6             | 1             | 0           | -2.510752               | 0.684500  | 1.847047  |
| 7             | 6             | 0           | -2.026688               | -1.271331 | -0.891890 |
| 8             | 1             | 0           | -1.485426               | -2.211887 | -1.012836 |
| 9             | 1             | 0           | -2.452509               | -1.016252 | -1.871840 |
| 10            | 6             | 0           | -1.058430               | -0.162253 | -0.492408 |
| 11            | 6             | 0           | 0.241237                | -0.333914 | -0.515867 |

|    |   |   |           |           |           |
|----|---|---|-----------|-----------|-----------|
| 12 | 6 | 0 | 1.532978  | -0.525875 | -0.527130 |
| 13 | 6 | 0 | 2.336594  | -1.051518 | 0.640524  |
| 14 | 1 | 0 | -0.382005 | 2.394191  | -1.155703 |
| 15 | 1 | 0 | 2.095011  | -0.285201 | -1.429308 |
| 16 | 6 | 0 | 3.416149  | -0.057464 | 1.135431  |
| 17 | 1 | 0 | 1.667413  | -1.279841 | 1.473394  |
| 18 | 1 | 0 | 2.832098  | -1.985309 | 0.351645  |
| 19 | 1 | 0 | 3.893962  | -0.470788 | 2.030707  |
| 20 | 1 | 0 | 2.933810  | 0.877781  | 1.439266  |
| 21 | 6 | 0 | 4.447809  | 0.233130  | 0.143270  |
| 22 | 6 | 0 | 5.295768  | 0.458255  | -0.679909 |
| 23 | 1 | 0 | 6.046867  | 0.663495  | -1.402731 |
| 24 | 6 | 0 | -3.872718 | -0.076747 | 0.363380  |
| 25 | 1 | 0 | -4.339840 | 0.267168  | -0.567548 |
| 26 | 1 | 0 | -4.677366 | -0.193586 | 1.096317  |
| 27 | 6 | 0 | -3.174072 | -1.419054 | 0.119202  |
| 28 | 1 | 0 | -2.776634 | -1.801912 | 1.067241  |
| 29 | 1 | 0 | -3.891115 | -2.161598 | -0.245724 |

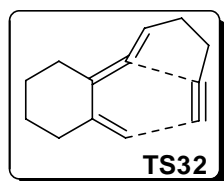

(Nimag=1) -522.2569

| Center Number | Atomic Number | Atomic Type | Coordinates (Angstroms) |           |           |
|---------------|---------------|-------------|-------------------------|-----------|-----------|
|               |               |             | X                       | Y         | Z         |
| 1             | 6             | 0           | -1.092226               | 0.831828  | -0.543615 |
| 2             | 6             | 0           | -0.341705               | 1.911883  | -0.946039 |
| 3             | 1             | 0           | -0.777024               | 2.906783  | -0.934826 |
| 4             | 6             | 0           | -2.479705               | 1.060492  | 0.042092  |
| 5             | 1             | 0           | -3.006798               | 1.814780  | -0.549155 |
| 6             | 1             | 0           | -2.360884               | 1.486961  | 1.048203  |
| 7             | 6             | 0           | -1.287502               | -1.676998 | -0.004816 |
| 8             | 1             | 0           | -0.634200               | -2.364095 | 0.537589  |
| 9             | 1             | 0           | -1.609576               | -2.211544 | -0.909299 |
| 10            | 6             | 0           | -0.484251               | -0.454478 | -0.450047 |
| 11            | 6             | 0           | 0.861947                | -0.586130 | -0.573615 |
| 12            | 6             | 0           | 1.985538                | -1.119450 | -1.004025 |
| 13            | 6             | 0           | 3.264572                | -0.893468 | -0.235817 |
| 14            | 1             | 0           | 0.530080                | 1.786153  | -1.570912 |
| 15            | 1             | 0           | 2.023266                | -1.671995 | -1.941720 |
| 16            | 6             | 0           | 2.910121                | -0.114933 | 1.045422  |

|    |   |   |           |           |           |
|----|---|---|-----------|-----------|-----------|
| 17 | 1 | 0 | 3.761821  | -1.838924 | 0.007497  |
| 18 | 1 | 0 | 3.968784  | -0.319288 | -0.850986 |
| 19 | 1 | 0 | 3.790907  | 0.383033  | 1.461842  |
| 20 | 1 | 0 | 2.536396  | -0.812491 | 1.802492  |
| 21 | 6 | 0 | 1.853691  | 0.871975  | 0.738744  |
| 22 | 6 | 0 | 1.304727  | 1.976630  | 0.680195  |
| 23 | 1 | 0 | 1.141418  | 3.007409  | 0.896891  |
| 24 | 6 | 0 | -3.324742 | -0.212828 | 0.150165  |
| 25 | 1 | 0 | -3.630636 | -0.542488 | -0.850715 |
| 26 | 1 | 0 | -4.243131 | 0.000399  | 0.706142  |
| 27 | 6 | 0 | -2.525203 | -1.328190 | 0.827455  |
| 28 | 1 | 0 | -2.219798 | -1.000078 | 1.828694  |
| 29 | 1 | 0 | -3.142199 | -2.222604 | 0.961674  |

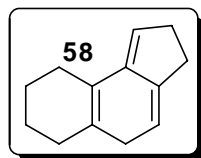

(Nimag=0)

| Center Number | Atomic Number | Atomic Type | Coordinates (Angstroms) |           |           |
|---------------|---------------|-------------|-------------------------|-----------|-----------|
|               |               |             | X                       | Y         | Z         |
| 1             | 6             | 0           | -2.770869               | -1.394179 | -0.366662 |
| 2             | 6             | 0           | -2.530028               | 1.081640  | -0.007780 |
| 3             | 6             | 0           | -1.300552               | -1.626941 | -0.002140 |
| 4             | 1             | 0           | -3.359650               | -2.287634 | -0.136660 |
| 5             | 1             | 0           | -2.857119               | -1.229584 | -1.447761 |
| 6             | 1             | 0           | -2.774904               | 1.904003  | 0.675928  |
| 7             | 1             | 0           | -2.840489               | 1.431193  | -1.003902 |
| 8             | 1             | 0           | -0.855041               | -2.345089 | -0.699152 |
| 9             | 1             | 0           | -1.231080               | -2.094665 | 0.989823  |
| 10            | 6             | 0           | -0.473465               | -0.357566 | -0.004101 |
| 11            | 6             | 0           | -1.032449               | 0.872469  | -0.012866 |
| 12            | 6             | 0           | 0.983950                | -0.481239 | 0.013439  |
| 13            | 6             | 0           | 1.760581                | -1.585151 | 0.068515  |
| 14            | 1             | 0           | 1.399747                | -2.605509 | 0.111699  |
| 15            | 6             | 0           | 3.232690                | -1.251235 | 0.082625  |
| 16            | 6             | 0           | 3.273094                | 0.301042  | -0.033238 |
| 17            | 1             | 0           | 3.768157                | -1.738544 | -0.740592 |
| 18            | 1             | 0           | 3.712337                | -1.602998 | 1.004381  |
| 19            | 1             | 0           | 3.826902                | 0.756276  | 0.791791  |
| 20            | 1             | 0           | 3.764982                | 0.616187  | -0.957724 |
| 21            | 6             | 0           | 1.814982                | 0.726493  | -0.026227 |

|    |   |   |           |           |           |
|----|---|---|-----------|-----------|-----------|
| 22 | 6 | 0 | 1.277401  | 1.949179  | -0.054171 |
| 23 | 1 | 0 | 1.899750  | 2.839677  | -0.083360 |
| 24 | 6 | 0 | -3.322428 | -0.173433 | 0.372076  |
| 25 | 1 | 0 | -3.245078 | -0.339860 | 1.453358  |
| 26 | 1 | 0 | -4.384388 | -0.029143 | 0.150056  |
| 27 | 6 | 0 | -0.213088 | 2.142244  | -0.035700 |
| 28 | 1 | 0 | -0.497370 | 2.758895  | 0.832555  |
| 29 | 1 | 0 | -0.525677 | 2.746851  | -0.903065 |

---
